# Supplementary material for: Landscape of Epstein-Barr virus gene expression and perturbations in cancer
Source: Research Square preprint supplement (doi:10.21203/rs.3.rs-3911441/v1), 2024-02-02
Supplement: Supplementary file 1 [file 386908f7731bfaad0367b443.xlsx]

## Sheet: Cells
Designation	PatientID	# total cell	Epithelial cell	Epi%	EBV- Epi	EBV+ Epi	EBV- NonEpi	EBV+ NonEpi	EBV+Epi (%)	EBV+NonEpi (%)
scNPC1	NPC_dir1	6723	1194	0.177599	484	710	5389	140	0.5946	0.025321
scNPC2	NPC_dir2	6914	118	0.0170668	2	116	5573	1223	0.9831	0.179959
scNPC3	NPC_dir3	10674	371	0.0347574	371	0	10303	0	0	0
scNPC4	NPC_dir4	2423	113	0.0466364	104	9	2296	12	0.0796	0.00519931
scNPC5	NPC_dir5	7262	213	0.0293308	5	208	3559	3490	0.9765	0.495106
scNPC6	NPC_dir6	8374	444	0.0530213	214	230	7834	96	0.518	0.0121059
scNPC7	NPC_dir7	7896	71	0.00899189	67	4	7825	0	0.0563	0
scNPC8	NPC_dir8	13207	98	0.00742031	70	28	13101	8	0.2857	0.000610268
scNPC9	NPC_dir9	3462	169	0.0488157	102	67	3263	30	0.3964	0.00911023
scNPC10	NPC_dir10	4637	239	0.0515419	235	4	4394	4	0.0167	0.000909504
scNPC11	NPC_dir11	12884	4801	0.372633	2981	1820	7185	898	0.3791	0.111097
scNPC12	NPC_dir12	12650	2263	0.178893	1652	611	9752	635	0.27	0.0611341
scNPC13	NPC_dir13	8765	2866	0.326982	1887	979	5698	201	0.3416	0.0340736
scNPC14	NPC_dir14	22955	1500	0.0653452	1140	360	21361	94	0.24	0.00438126
scNPC15	NPC_dir15	18684	200	0.0107043	199	1	18478	6	0.005	0.000324605
scNT1	NonNPC_dir1	15304	574	0.0375065	574	0	14730	0	0	0
scNPC16	NPC33_sep	6059	122	0.0201353	90	32	5932	5	0.2623	0.000842176
scNPC17	NPC36_sep	3492	164	0.0469645	41	123	3278	50	0.75	0.015024
scNPC18	NPC46_sep	5291	534	0.100926	92	442	4065	692	0.8277	0.14547
scNPC19	NPC47_sep	5243	3631	0.692542	2352	1279	1581	31	0.3522	0.0192308
scNPC20	NPC49_sep	3166	199	0.0628553	199	0	2967	0	0	0
scNPC21	NPC50_sep	816	396	0.485294	372	24	397	23	0.0606	0.0547619
scNPC22	NPC51_sep	4532	294	0.064872	294	0	4238	0	0	0
scNT2	N52_sep	13046	166	0.0127242	166	0	12880	0	0	0
scNT3	N53_sep	6345	51	0.00803783	51	0	6294	0	0	0
scNT4	N54_sep	7775	142	0.0182637	142	0	7633	0	0	0
scNT5	N55_sep	23428	81	0.0034574	81	0	23347	1	0	4.28302e-05
scNT6	N57_sep	10723	157	0.0146414	157	0	10566	0	0	0
scNPC23	NPC58_sep	13381	5905	0.441297	3084	2821	6990	486	0.4777	0.065008
scNPC24	NPC59_sep	9422	160	0.0169815	146	14	9253	9	0.0875	0.000971712
scNPC25	NPC60_sep	9110	174	0.0190999	141	33	8906	30	0.1897	0.00335721
scNT7	N61_sep	3955	100	0.0252845	100	0	3855	0	0	0
scNPC26	NPC62_sep	13595	428	0.0314822	147	281	12704	463	0.6565	0.0351637
scNPC27	NPC63_sep	10467	54	0.00515907	54	0	10413	0	0	0
scNPC28	NPC64_sep	9512	194	0.0203953	104	90	9249	69	0.4639	0.00740502
scNPC29	NPC65_sep	12538	282	0.0224916	229	1	12285	23	0.0043	0.0018687
scNPC30	NPC66_sep	7422	113	0.015225	56	57	7244	65	0.5044	0.00889315
scNT8	N68_sep	7264	0	0	0	0	7264	0	0	0
scNPC31	NPC69_sep	11606	18	0.00155092	14	4	11583	5	0.2222	0.000431481
scNPC32	P1802_PriTis	12611	967	0.0766791	448	519	11496	148	0.5367	0.0127104
scNPC33	P1805_PriTis	8285	215	0.0259505	117	98	8062	8	0.4558	0.000991326
scNPC34	P1806_PriTis	12185	39	0.00320066	24	15	12143	3	0.3846	0.000246995
scNPC35	P1807_PriTis	10497	90	0.00857388	40	50	10387	20	0.5556	0.00192178
scNPC36	P1808_PriTis	11927	192	0.0160979	184	8	11732	3	0.0417	0.000255646
scNPC37	P1810_PriTis	6588	219	0.0332423	93	126	6337	32	0.5753	0.00502434
scNPC38	P1811_PriTis	5164	69	0.0133617	46	23	5093	2	0.3333	0.000392542
scNPC39	P1813_PriTis	7082	732	0.103361	225	507	6030	320	0.6926	0.0503937
scNPC40	P1815_PriTis	9098	497	0.0546274	393	104	8586	15	0.2093	0.00174398
scNPC41	P1816_PriTis	8787	1622	0.184591	695	927	7025	140	0.5715	0.0195394
scNPC42	Patient01	2610	195	0.0747126	195	0	2415	0	0	0
scNPC43	Patient02	4329	119	0.027489	91	28	4196	14	0.2353	0.00332542
scNPC44	Patient03	6324	98	0.0154965	81	17	6226	0	0.1735	0
scNPC45	Patient04	5373	37	0.00688628	37	0	5333	3	0	0.000562219
scNPC46	Patient05	4189	99	0.0236333	57	42	4075	15	0.4242	0.00366748
scNPC47	Patient06	5843	181	0.0309772	181	0	5662	0	0	0
scNPC48	Patient07	4613	100	0.0216779	95	5	4513	0	0.05	0
scNPC49	Patient08	1924	16	0.00831601	11	5	1906	2	0.3125	0.00104822
scNPC50	Patient09	8787	163	0.0185501	154	9	8622	2	0.0552	0.000231911
scNPC51	Patient10	6629	0	0	0	0	6629	0	0	0
scNT9_1	Patient11_rep1	5788	52	0.00898411	52	0	5736	0	0	0
scNT9_2	Patient11_rep2	5818	76	0.0130629	76	0	5742	0	0	0
scNT10	Patient12	7468	57	0.00763257	57	0	7411	0	0	0
scNT11	Patient13	5183	45	0.00868223	45	0	5138	1	0	0.00019459
scNPC52	Patient14	4018	0	0	0	0	4016	2	0	0.00049776

## Sheet: EBV+ cells
Designation	PatientID	#total EBV+ cell	EBV+ Epi	EBV+ B	EBV+ T	EBV+ NK	EBV+ Mye	EBV+ CAFs/Endo
scNPC1	NPC_dir1	0.126432	0.59464	0.0228401	0.0286645	0	0.0140515	0
scNPC2	NPC_dir2	0.193665	0.983051	0.18972	0.161066	0.148936	0.240838	0
scNPC3	NPC_dir3	0	0	0	0	0	0	0
scNPC4	NPC_dir4	0.00866694	0.079646	0	0.00699301	0	0.00138696	0
scNPC5	NPC_dir5	0.509226	0.976526	0.473029	0.477152	0.471591	0.713504	0
scNPC6	NPC_dir6	0.03893	0.518018	0.0139211	0.0114689	0.00601504	0.0133211	0.0406504
scNPC7	NPC_dir7	0.000506586	0.056338	0	0	0	0	0
scNPC8	NPC_dir8	0.00272583	0.285714	0.000764234	0.000611933	0	0	0
scNPC9	NPC_dir9	0.0280185	0.39645	0.0108969	0.00850822	0	0.0123457	0
scNPC10	NPC_dir10	0.00172525	0.0167364	0	0.00113701	0	0	0
scNPC11	NPC_dir11	0.210959	0.379088	0.115776	0.11102	0	0.108403	0
scNPC12	NPC_dir12	0.098498	0.269996	0.0472441	0.060669	0	0.0714286	0.0551724
scNPC13	NPC_dir13	0.134626	0.341591	0.0243446	0.0417223	0.0226244	0.02849	0.0740741
scNPC14	NPC_dir14	0.0197778	0.24	0.00511632	0.00369372	0	0.00370714	0
scNPC15	NPC_dir15	0.000374652	0.005	0.00041834	0.000165098	0	0	0
scNT1	NonNPC_dir1	0	0	0	0	0	0	0
scNPC16	NPC33_sep	0.00610662	0.262295	0.00146306	0.00070028	0	0	0
scNPC17	NPC36_sep	0.0495418	0.75	0.0183346	0.0149347	0.0104167	0.00316456	0
scNPC18	NPC46_sep	0.214326	0.827715	0.151173	0.144741	0	0.135714	0.24
scNPC19	NPC47_sep	0.249857	0.352245	0.0258621	0.0147569	0.0403226	0.0319149	0
scNPC20	NPC49_sep	0	0	0	0	0	0	0
scNPC21	NPC50_sep	0.057598	0.0606061	0.0584615	0.0421053	0	0	0
scNPC22	NPC51_sep	0	0	0	0	0	0	0
scNT2	N52_sep	0	0	0	0	0	0	0
scNT3	N53_sep	0	0	0	0	0	0	0
scNT4	N54_sep	0	0	0	0	0	0	0
scNT5	N55_sep	4.2684e-05	0	6.04705e-05	0	0	0	0
scNT6	N57_sep	0	0	0	0	0	0	0
scNPC23	NPC58_sep	0.247141	0.492972	0.0335052	0.0366771	0	0.113622	0.047619
scNPC24	NPC59_sep	0.0024411	0.0875	0.000963391	0.00071736	0	0.00103842	0.0137931
scNPC25	NPC60_sep	0.00691548	0.189655	0.00174749	0.00367079	0.00107411	0.00595238	0.0134409
scNT7	N61_sep	0	0	0	0	0	0	0
scNPC26	NPC62_sep	0.054726	0.656542	0.0189222	0.0436859	0.0227273	0.0205479	0.0277778
scNPC27	NPC63_sep	0	0	0	0	0	0	0
scNPC28	NPC64_sep	0.0167157	0.463918	0.0107172	0.00532403	0.00320513	0.0173502	0.00534759
scNPC29	NPC65_sep	0.00191418	0.0035461	0.00253165	0.00143472	0	0	0
scNPC30	NPC66_sep	0.0164376	0.504425	0.0198525	0.00510313	0.004914	0.00917431	0
scNT8	N68_sep	0	0	0	0	0	0	0
scNPC31	NPC69_sep	0.000775461	0.222222	0.000712504	0.000186463	0	0	0
scNPC32	P1802_PriTis	0.0528903	0.536711	0.00978179	0.0124014	0	0.017301	0
scNPC33	P1805_PriTis	0.0127942	0.455814	0.000288517	0.00174303	0	0	0
scNPC34	P1806_PriTis	0.00150956	0.384615	0.000540541	0.00021046	0	0	0
scNPC35	P1807_PriTis	0.00666857	0.555556	0.00178317	0.00201803	0	0	0
scNPC36	P1808_PriTis	0.000922277	0.0416667	0.000539665	0.000202388	0	0	0
scNPC37	P1810_PriTis	0.023983	0.575342	0.0031264	0.00617602	0	0.00518135	0
scNPC38	P1811_PriTis	0.00484121	0	0	0.000439464	0	0	0
scNPC39	P1813_PriTis	0.116775	0.692623	0.0381818	0.0519337	0.0251799	0.069541	0
scNPC40	P1815_PriTis	0.0130798	0.209256	0	0.00189146	0	0.00442478	0
scNPC41	P1816_PriTis	0.121429	0.571517	0.0078329	0.014244	0.00904977	0.0824261	0
scNPC42	Patient01	0	0	0	0	0	0	0
scNPC43	Patient02	0.00970201	0.235294	0.0011655	0.00505051	0	0	0
scNPC44	Patient03	0.00268817	0.173469	0	0	0	0	0
scNPC45	Patient04	0.000558347	0	0	0.00199336	0	0	0
scNPC46	Patient05	0.0136071	0.424242	0.00396432	0.00267094	0	0.01	0
scNPC47	Patient06	0	0	0	0	0	0	0
scNPC48	Patient07	0.00108389	0.05	0	0	0	0	0
scNPC49	Patient08	0.00363825	0.3125	0	0.00203459	0	0	0
scNPC50	Patient09	0.00125185	0.0552147	0.000304692	0.000191791	0	0	0
scNPC51	Patient10	0	0	0	0	0	0	0
scNT9_1	Patient11_rep1	0	0	0	0	0	0	0
scNT9_2	Patient11_rep2	0	0	0	0	0	0	0
scNT10	Patient12	0	0	0	0	0	0	0
scNT11	Patient13	0.000192938	0	0.000354233	0	0	0	0
scNPC52	Patient14	0.00049776	0	0.000617665	0.000508906	0	0	0
