# Supplementary material for: Landscape of Epstein-Barr virus gene expression and perturbations in cancer
Source: Research Square preprint supplement (doi:10.21203/rs.3.rs-3911441/v1), 2024-02-02
Supplement: Supplementary file 2 [file 55431adc10057ff0efe35980.xlsx]

## Sheet: House-keeping genes tpm
Sample ID	Designation	RPL11	RPS27A	EEF1B2	RPL9	EEF1A1	ACTB	RPL7A	RPS13	GAPDH	RPLP0	RPL23	RPL38	HPRT1
SRR5908786	NPC1	874.053	880.647	795.625	899.911	6756.67	1908.91	2053.43	866.456	3640.62	2402.47	423.484	304.892	82.2309
SRR5908766	NPC2	1575.94	1509.47	1023.01	3243.72	8989.57	1405.03	3568.08	2344.99	2973.29	5834.37	949.526	716.336	74.2202
SRR5908804	NPC3	568.355	1714.29	684.45	931.481	5602.92	1161.79	1233.65	1368.38	2816.15	2500.3	382.79	286.147	51.8758
SRR5908757	NPC4	1247.72	860.76	662.584	580.001	9350.89	2147.19	1356.63	462.987	4990.88	2966.6	441.069	266.805	70.6119
SRR5908775	NPC5	657.121	682.966	437.251	458.504	6369.21	4000.67	1716.87	636.586	2970.16	1318.91	257.72	288.749	67.6574
SRR5908803	NPC6	1338.36	975.028	782.172	1093.06	8016.07	2529.58	1958.84	896.116	3518.01	2757.47	478.952	262.446	40.9863
SRR5908853	NPC7	1783.9	1133.34	612.5	1303.64	9937.09	3859.91	1739.82	1027.33	4782.82	3683.81	472.762	355.609	100.169
SRR5908771	NPC8	1926.38	1771.15	1290.99	1182.46	9401.43	4810.44	2826.69	921.21	3132.3	2992.59	501.095	399.149	96.6124
SRR5908841	NPC9	1269.88	730.427	679.371	939.289	5733.92	3118.43	2314.84	663.128	3813.51	2113.05	321.252	218.992	50.2864
SRR5908837	NPC10	1709.42	2402.35	985.368	1508.08	9132.01	2992.6	1583.92	1215.72	3003.23	4338.37	499.384	301.021	54.8856
SRR5908763	NPC11	2568.23	1492.79	1392.25	1910.18	13767.5	2401.74	4021.44	1453.28	6648.61	5356.59	1152.74	668.845	89.2089
SRR5908794	NPC12	678.399	1096.19	772.156	861.673	5401.17	2421.42	1134.55	797.413	1895.99	1888.06	300.843	208.146	47.4926
SRR5908813	NPC13	2262.14	1823.71	1492.3	2874.85	13606	2271.28	4240.62	1672.5	4512.24	6901.9	595.389	533.814	111.725
SRR5908758	NPC14	2018.67	1459.42	1245.12	1738.47	11876.9	4166.13	1664.11	1354.07	3821.98	3717.4	524.201	392.049	99.9673
SRR5908747	NPC15	1429.99	1519.29	1068.18	1229.77	10128.1	3915.05	1562.65	1139.1	3465.45	2866.23	416.271	310.949	81.2514
SRR5908762	NPC16	724.02	616.552	487.39	766.401	4337.22	2018.06	984.174	369.901	1346.24	1353.9	250.86	227.249	48.0383
SRR5908754	NPC17	2749.87	1680.97	1024.66	2191.44	13330.2	3017.22	2969.46	1652.46	5400.84	6001.74	645.797	516.564	64.9893
SRR5908795	NPC18	957.523	676.84	462.331	757.741	4097.42	3660.59	1868.89	539.372	2454.33	1402.43	261.98	201.679	45.6119
SRR5908811	NPC19	1220.65	1027.56	638.974	908.624	7380.79	2605.5	3034.86	620.545	4095.44	3115.73	376.539	245.731	69.1067
SRR5908834	NPC20	1195.32	886.316	998.949	908.664	6233.48	3920.28	2338.65	699.081	3861.78	2451.33	388.861	251.585	83.2578
SRR5908836	NPC21	927.411	422.16	487.676	681.172	4416.54	2980.4	1494.43	438.956	1959.23	1151.56	216.331	171.334	49.1
SRR5908833	NPC22	1121.91	735.816	559.963	749.367	4893.66	2871.2	1361.68	401.744	1538.27	1205.97	296.582	220.877	45.6892
SRR5908846	NPC23	1397.1	742.392	486.143	715.737	3457.29	2530.39	1562.91	476.315	3667.78	1782.69	249.603	213.104	47.1829
SRR5908781	NPC24	1104.78	576.577	452.275	541.986	4094.17	3593.02	1184.44	382.921	2760.94	1924.09	317.486	273.358	63.2815
SRR5908800	NPC25	1158.42	1071.85	949.756	1642.96	7280.27	3395.21	2538.46	930.451	3159.68	2795.26	476.618	586.27	84.6496
SRR5908819	NPC26	552.161	725.921	727.884	658.074	6005	2608.6	1932.77	598.273	5228.83	1811.19	261.393	229.99	152.719
SRR5908815	NPC27	3046.8	1752.16	980.641	2670.56	7800.54	1242.49	3945.93	626.543	9112.44	3784.61	665.088	584.502	38.4509
SRR5908840	NPC28	1976.17	1528.7	839.815	1410.37	11695.4	1947.41	3130.81	1172.2	10803.6	5735.23	830.541	470.84	49.3671
SRR5908796	NPC29	1313.35	564.351	712.202	684.23	9238.08	3064.49	1729.55	901.771	5562.69	3533.19	418.759	255.426	54.7812
SRR5908848	NPC30	753.519	853.816	701.288	859.166	7102.08	2949.48	2097.08	621.033	4180	2268.11	333.125	217.751	84.01
SRR5908806	NPC31	1186.14	608.158	360.408	794.167	5218.69	2794.24	1825.87	527.511	9327.78	2416.28	255.35	251.97	53.0884
SRR5908825	NPC32	1729.84	1056.96	806.667	1100.16	7474.53	3239.36	2253.9	862.752	4322.13	2700.95	387.671	341.648	57.0673
SRR5908850	NPC33	878.254	1076.88	877.798	1488.83	6695.11	1673.34	1579.8	862.525	4905.15	2638.14	608.322	445.634	68.3874
SRR5908760	NPC34	1199.15	790.291	610.703	1097.67	5598	4024.8	1691.42	709.936	2319.41	1414.82	372.938	222.865	47.6128
SRR5908807	NPC35	716.091	1066.31	617.197	1104.21	6098.04	2349.97	1887.73	694.204	2472.29	1504.88	363.288	238.839	46.9736
SRR5908764	NPC36	1166.46	872.457	535.031	732.101	6020.56	3938.68	1639.66	398.772	2923.65	2092.89	339.101	239.155	46.3694
SRR5908856	NPC37	1110.45	1234.62	764.227	1326.72	12476.8	3226.07	1991.76	851.437	4747.59	3614.67	482.203	347.299	83.5019
SRR5908808	NPC38	1221.95	958.846	480.874	977.887	6128.33	1417.57	1342.14	614.669	4277.99	2778.07	604.612	388.963	44.5176
SRR5908789	NPC39	1507.6	972.458	921.686	1145.88	8294.34	4462.85	2605.41	824.459	3880.29	2504.93	415.353	305.317	91.6802
SRR5908798	NPC40	1727.58	1063.08	495.907	1325.43	8490.3	4026.72	1613.86	486.859	4157.23	3720.51	566.037	338.096	55.9751
SRR5908810	NPC41	2302.5	1121.06	831.09	1360.47	5875.76	4724.84	3318.81	813.351	3513.04	2894.59	563.376	473.078	76.4502
SRR5908767	NPC42	1190.13	1206.9	977.323	1306.72	7521.28	2189.53	2884.99	1091.55	10414.2	2569.86	636.049	575.468	91.2351
SRR5908809	NPC43	688.865	767.566	734.171	818.4	6344.92	3397.58	1039.57	657.04	5202.72	2508.71	377.946	223.904	88.9603
SRR5908799	NPC44	1247.71	870.265	664.056	826.644	5212.24	4402.7	1374.5	558.372	1811.89	1322.06	312.142	191.78	60.3923
SRR5908791	NPC45	1251.46	1416.36	614.298	826.821	5233.84	4220.63	901.215	608.677	4786.19	2332.91	390.322	239.791	61.7087
SRR5908788	NPC46	2192.83	2783.51	651.561	1761.96	13451.6	4014.22	2025.1	665.762	6566.7	4470.12	789.372	545.141	96.0178
SRR5908784	NPC47	1431.48	868.303	697.958	897.78	7328.12	6394.31	1794.26	683.376	2389.98	1624.46	382.448	238.55	68.3404
SRR5908845	NPC48	686.262	781.926	723.484	900.973	5887.34	2604.26	1902.62	364.616	4910.99	1903.27	375.053	287.778	63.2009
SRR5908797	NPC49	1235.5	803.466	653.525	731.382	6236.71	2699.91	1976.18	666.792	5665.72	2880.4	303.16	259.126	78.5288
SRR5908814	NPC50	840.427	812.917	519.688	1173.2	5030.95	4700.24	2095.91	511.859	4022.11	2205.66	354.49	283.808	81.6391
SRR5908854	NPC51	1048.34	1068.02	576.81	964.2	4192.64	3790.38	1751.96	499.92	2864.54	2015.34	442.62	307.98	77.5672
SRR5908802	NPC52	1509.15	1550.95	1327.01	1254.7	9543.52	4679.82	2069.57	754.044	4962.32	3893.96	512.901	365.552	63.2494
SRR5908756	NPC53	1658.42	1320.2	533.395	1622.7	9841.35	2194.33	3068.48	1050.33	13043.1	4032.01	655.112	451.386	71.8893
SRR5908790	NPC54	1497.91	1086.13	746.403	813.372	7796.59	4835.33	1453.61	755.832	2075.65	1853.89	372.171	255.375	73.6155
SRR5908769	NPC55	908.65	1137.18	385.532	1406.55	7406.24	2579.46	2684.33	932.466	8659.21	3384.84	308.154	423.665	58.3431
SRR5908776	NPC56	980.809	957.663	421.351	659.881	6583.05	5189.58	2806.29	441.918	3421.02	1508.93	424.426	358.12	69.3685
SRR5908849	NPC57	1152.13	890.083	614.436	1010.49	6431.33	2829.35	1970.76	689.333	5034.31	3115.96	318.22	241.836	57.516
SRR5908818	NPC58	1508.77	893.274	644.598	1288.32	7267.79	3018.57	2514.85	876.374	5527.93	2408.13	361.763	340.927	83.3304
SRR5908820	NPC59	1046.26	1053.53	578.307	1235.43	8259.85	3837.72	2505.99	824.448	4522.19	1825.56	601.229	362.306	74.9399
SRR5908821	NPC60	971.314	549.204	548.156	724.264	5157.94	3181.98	1603.26	536.59	2177.2	1140.06	280.814	171.216	50.4706
SRR5908829	NPC61	1476.43	1226.22	875.944	1542.21	9647.36	3298.13	3390.59	1087.24	5322.66	2834.42	519.608	389.258	117.355
SRR5908826	NPC62	1155.93	680.072	425.514	898.339	3752.24	3548.59	1762.73	649.778	2114.35	1018.94	333.511	373.506	45.6006
SRR5908773	NPC63	1310.01	855.198	772.567	739.919	6988.96	3057.44	1847.33	959.432	6343.65	3370.97	333.882	272.606	83.3716
SRR5908753	NPC64	1726.39	900.666	762.312	947.616	6453.69	4051.6	3003.2	428.114	4720.91	1923.99	326.758	305.285	72.6371
SRR5908759	NPC65	1563.61	992.754	885.8	1305.37	5546.51	3302.93	1558.7	538.522	5468.7	3899.72	430.98	379.536	106.386
SRR5908774	NPC66	1357.27	1626.55	928.135	1365.13	13305	2465.37	2220.92	1383.81	8337.34	6201.81	524.769	776.897	106.846
SRR5908827	NPC67	1085.15	1059.97	842.723	1018.37	8090.15	2869.41	1630.04	837.293	3915.91	2916.46	391.248	302.112	63.9413
SRR5908782	NPC68	1094.4	662.513	601.49	670.379	5187.17	3429.09	1611.05	545.737	2342.1	1277.73	279.932	228.161	67.4983
SRR5908779	NPC69	982.153	770.984	487.504	604.765	5194.49	3718.95	1255.79	467.747	2455.32	1598.3	334.846	244.152	46.5537
SRR5908839	NPC70	798.405	834.736	529.184	872.446	7290.14	3759.42	1253.84	804.525	5703.18	2085.68	291.96	351.157	65.9786
SRR5908855	NPC71	621.191	569.693	636.407	462.104	4623.07	2958.61	1100.34	465.797	1416.05	951.447	193.37	225.967	58.5744
SRR5908748	NPC72	1091.86	1102.45	1029.61	1248.41	9465.84	4043.72	3492.65	867.296	6859.92	5043.33	473.254	374.76	85.3707
SRR5908787	NPC73	977.51	1308.11	1872.5	1521.42	13506.9	2811.4	2183.69	1447.48	5556.44	8141.24	552.293	525.28	81.1733
SRR5908750	NPC74	1196.65	726.029	581.203	771.932	5657.21	3206.92	2124.96	642.279	2653.9	1565.21	321.399	239.468	52.1345
SRR5908777	NPC75	869.713	771.467	589.484	679.611	7629.69	5725.31	1804.67	503.243	3516.93	1506.13	287.375	217.812	69.3208
SRR5908844	NPC76	1487.64	1162.79	703.156	974.954	7027.22	4900.39	2316.22	743.839	2113.56	1649.67	414.606	307.331	84.9394
SRR5908859	NPC77	853.552	607.189	385.027	596.7	5915.04	2632.7	1244.44	743.608	10327.5	2824.85	470.208	290.569	109.587
SRR5908749	NPC78	862.835	991.151	744.987	1054.17	7041.12	3827.37	2272.52	440.753	4453.02	2475.01	451.263	317.741	62.1859
SRR5908780	NPC79	747.408	775.733	473.703	517.389	4009.34	4887.19	988.77	480.172	4816.4	1350.21	249.799	255.393	76.5779
SRR5908768	NPC80	1607.1	1120.47	680.298	679.78	6189.35	2101.57	2617.97	919.12	9118.7	3392.89	431.806	698.197	113.227
SRR5908783	NPC81	1241.79	771.48	410.468	923.212	3925.5	2282.46	874.813	423.782	5853.43	1790.39	335.853	268.866	73.2565
SRR5908830	NPC82	1223.8	986.781	652.378	736.817	7140.1	4691.63	1730	731.539	5873.72	2019.2	383.96	247.786	101.564
SRR5908778	NPC83	1365.51	762.695	464.131	713.879	6163.12	4035.45	1581.17	506.105	4345.29	1542.17	309.251	243.934	68.2135
SRR5908843	NPC84	1382.74	1015.67	822.693	1071.08	7629.92	4595.52	2080.12	689.067	2459.12	1757.01	391.524	306.238	64.6878
SRR5908805	NPC85	1973.61	1280.79	1000.75	1886.96	11988.6	2421.9	3740.93	1475.31	4614.97	3137.11	552.848	447.58	53.9898
SRR5908851	NPC86	689.258	823.453	621.544	752.103	6369.04	3215.73	1898.15	673.169	2897.11	1504.87	430.577	229.203	68.8433
SRR5908822	NPC87	1002.72	829.917	790.193	1175.38	5421.33	3068.13	2026.36	534.621	1421.51	1777.14	359.665	255.01	58.8237
SRR5908752	NPC88	1193.5	1224.42	540.246	938.446	5590.82	3878.97	1396.28	604.921	2826.44	2134.75	415.449	320.912	69.3619
SRR5908765	NPC89	1606.93	1025.95	769.798	1293.2	8507.99	2206.14	3010.04	819.428	8104.98	3536.23	551.648	389.203	70.0719
SRR5908761	NPC90	729.901	991.828	744.122	1031.94	5609.12	1878.83	1912.19	726.503	4182.16	2268.42	407.536	297.171	64.2916
SRR5908823	NPC91	1263.89	1223.88	563.677	1278.19	6339.4	4519.73	2691.86	980.669	5478.6	2420.46	337.305	325.581	98.2627
SRR5908755	NPC92	718.571	1114.71	724.465	1101.3	6972.4	3231.42	2767.74	728.406	3936.28	2376.46	397.801	321.314	58.3455
SRR5908772	NPC93	751.223	740.511	294.597	587.186	2219.1	1890.93	766.621	328.452	3151.84	1127.42	200.034	144.692	31.1205
SRR5908857	NPC94	738.2	660.485	487.605	647.617	5024.68	3020.64	1177.48	440.753	1722.49	1190.38	257.363	172.249	45.4609
SRR5908751	NPC95	983.51	772.058	427.74	509.144	5007.41	3049.31	926.756	547.671	7228.78	2902.69	254.98	229.85	67.8196
SRR5908793	NPC96	1479.06	1116.92	852.369	660.029	4587.16	3058.89	2484.54	463.61	6942.97	1329.53	381.935	322.47	87.2766
SRR5908852	NPC97	1673.55	1639.03	841.113	1041.92	4247.1	5146.46	2624.63	741.223	3598.75	3800.54	519.047	402.221	113.013
SRR5908816	NPC98	1223.47	787.796	517.386	890.441	5342.19	2623.55	1452.75	508.648	1477.84	1656.88	310.705	250.361	48.6709
SRR5908831	NPC99	1291.8	770.902	583.644	822.653	5732.76	2951.04	1478.58	605.017	1182.42	1132.66	312.847	212.4	43.0375
SRR5908801	NPC100	941.215	720.303	782.023	670.262	6625.26	3594.16	1536.96	607.356	2955.63	1919.24	270.707	189.18	55.497
SRR5908847	NPC101	732.333	757.753	473.689	572.174	5566.73	3629.46	1112.77	517.955	5820.62	1506.32	316.202	251.253	98.7393
SRR5908817	NPC102	1123.88	704.082	515.756	647.066	5626.63	5720.4	1311.89	530.559	3222.71	1299.52	295.993	200.636	48.2677
SRR5908824	NPC103	1604.92	1176.59	757.02	761.512	7701.2	4398.92	1926.74	699.861	1974.12	1593.71	346.896	267.626	60.8824
SRR5908812	NPC104	2005.32	1320.6	1029.21	1292.77	9069.86	6163.29	2002.09	1028.55	2863.95	2230.57	504.014	396.205	81.4327
SRR5908792	NPC105	905.237	680.933	496.713	584.247	5864.51	5682.23	1261.19	393.947	2776.91	1206.08	270.455	203.598	61.7013
SRR5908835	NPC106	1100.16	1464.1	486.03	1505.4	6039.76	4115.79	1439.94	424.093	3145.59	1879.54	391.039	331.546	38.1119
TCGA.BR.8686.01A	GAC1	759.873	277.18	285.24	425.668	3376.14	4390.28	745.364	446.721	709.157	848.865	200.764	331.804	52.9361
TCGA.HU.A4G6.01A	GAC2	1360.41	686.762	577.733	692.991	2952.27	3508.45	3023.86	583.851	2221.74	1264.54	320.685	454.739	121.768
TCGA.BR.A4J4.01A	GAC3	369.827	294.406	209	382.704	2132.06	5279.91	924.388	287.049	3002.91	1074.16	165.756	330.801	64.6626
TCGA.HU.A4H0.01A	GAC4	723.3	535.42	407.143	456.509	3059.61	4988.34	1011.69	426.49	3257.86	973.257	325.618	267.77	145.609
TCGA.D7.A4YX.01A	GAC5	1429.3	581.939	577.906	866.388	5004.85	6877.65	2340.24	832.835	3260.32	1423.74	299.987	475.983	152.691
TCGA.VQ.A923-01A	GAC6	555.565	276.91	209.27	380.491	2167.3	6020.37	554.115	294.037	925.286	616.505	162.232	183.561	61.3722
TCGA.BR.8589.01A	GAC7	1137.05	418.771	449.522	648.384	4312.03	4215.4	1477.96	529.174	3563.88	2213.04	291.675	380.238	106.782
TCGA.BR.4253.01A	GAC8	1036.95	446.464	616.834	547.9	5288.64	4686.65	835.273	771.864	2871.45	1022.34	233.443	223.472	188.892
TCGA.VQ.A8PF-01A	GAC9	767.71	444.454	364.555	500.034	3568.47	7458.39	1113.79	428.634	2258.89	916.429	199.069	222.496	64.4197
TCGA.VQ.AA69-01A	GAC10	658.578	373.029	360.863	538.053	4537.64	7235.12	1081.61	398.473	6909.6	1697.77	226.766	228.399	145.482
TCGA.CD.5801.01A	GAC11	771.151	625.55	367.408	536.568	2586.69	5304.62	1272.9	434.261	3197.46	950.277	269.534	313.678	56.1488
TCGA.HU.8608.01A	GAC12	708.983	365.256	399.986	431.817	3812.84	6690.88	1067.21	338.728	3578.29	1073.17	196.589	184.224	77.7608
TCGA.D7.8573.01A	GAC13	942.358	386.887	373.988	439.693	3101.67	5096.3	1267.86	499.69	3564.16	1266.03	211.962	703.132	119.614
TCGA.D7.5577.01A	GAC14	935.933	552.319	437.599	640.113	3221.28	6169.43	1416.48	708.849	3854.96	1132.21	262.63	289.312	80.2829
TCGA.BR.8381.01A	GAC15	1098.15	459.668	399.748	717.88	3733.55	5977.8	1498.93	545.124	2377.5	1891.37	281.45	361.834	79.5405
TCGA.BR.6455.01A	GAC16	1146.23	481.251	621.471	893.109	6633.76	4440.84	1976.01	1078.78	5031.13	2018.02	293.054	282.448	95.3905
TCGA.BR.8366.01A	GAC17	1174.89	433.736	394.671	696.56	4162.89	9241.48	1345.09	463.149	3300.73	1351.53	278.371	421.094	61.4919
TCGA.BR.6707.01A	GAC18	1585.05	621.626	529.906	970.251	2835.78	3397.52	2291.81	872.389	3391.44	1518.26	523.388	490.086	95.9556
TCGA.VQ.A91W.01A	GAC19	704.805	357.411	290.021	420.349	3491.91	5136.24	909.733	362.117	2663.25	1099.51	217.129	236.498	64.2423
TCGA.HU.A4G2.01A	GAC20	1321.51	676.517	591.143	899.229	3556.25	3587.57	1594.18	986.812	2472.51	1703.11	320.138	353.742	114.235
TCGA.B7.5818-01A	GAC21	1182.84	404.694	316.648	684.299	3272.6	4651.45	1091.94	567.496	6799.64	1367.38	439.768	493.815	89.0109
TCGA.BR.7196.01A	GAC22	905.268	411.564	337.395	529.264	3892.42	5868.21	918.665	440.446	1960.47	1122.31	283.909	256.36	53.0781
TCGA.FP.7998.01A	GAC23	642.681	231.865	239.16	342.493	3244.76	6309.13	814.601	220.107	2050.38	790.994	129.64	215.014	64.1948
TCGA.FP.7916.01A	GAC24	621.55	290.322	257.808	345.61	2602.66	7039.08	719.997	282.559	1924.91	705.409	163.987	265.122	57.7037
TCGA.BR.6706.01A	GAC25	931.561	392.037	285.547	503.2	3093.19	6740.13	768.694	399.857	2735.98	933.371	258.529	247.651	54.8483
TCGA.D7.A6EZ-01A	GAC26	683.881	303.124	264.849	419.324	1812.7	4981.75	1306.13	323.825	4331.09	907.79	181.548	436.915	174.271
TCGA.CG.5722.01A	GAC27	944.159	563.438	551.045	992.757	3250.01	4519.61	1188.14	701.2	3837.53	1720.36	387.598	473.426	47.7022
TCGA.BR.7958.01A	GAC28	913.318	328.232	288.017	437.884	2366.37	7814.89	1044.16	309.6	2323.95	890.637	183.399	424.011	52.1791
TCGA.D7.8570.01A	GAC29	444.056	267.643	234.576	321.081	1861.62	5010.96	772.111	247.92	1564.08	727.149	139.632	232.471	47.5068
TCGA.B7.A5TK.01A	GAC30	994.377	429.915	250.031	498.332	2615.46	9196	1221.78	440.721	2134.15	843.673	209.845	379.77	128.241
SRR5227642	eBL1	2758.88	1113.79	1754.87	1285.6	10082.4	3720.96	4804.3	948.552	6290	3865.78	803.597	987.125	67.5288
SRR5227624	eBL2	4456.08	1699.86	3606.29	2105.72	9611.53	3079.89	6816.28	2118.44	4294.25	3754.67	1149.17	1400.56	175.762
SRR5227631	eBL3	1180.11	462.215	950.697	475.932	4940.71	2796.08	1820.21	449.469	1834.99	1286.75	475.355	456.807	53.9702
SRR5227640	eBL4	2135.76	609.443	1562.77	856.298	7638.01	2974.61	3607.27	745.035	3447.43	2464.3	444.671	691.348	93.1556
SRR5227621	eBL5	2337.34	917.02	1353.81	790.619	6328.43	5540.2	3086.79	813.263	4458.9	2049.67	871	718.325	96.2118
SRR5227635	eBL6	1974.93	683.853	1353.41	702.861	6642.18	4663.39	3128.34	655.815	5466.52	2136.71	593.539	576.347	103.194
SRR5227637	eBL7	2628.69	877.586	1853.58	1057.83	9318.94	3554.59	3253.86	1053.74	4027.43	2681.39	818.672	819.735	73.1444
SRR5227620	eBL8	1875.59	635.686	1047.1	713.419	5203.22	4636.16	2389.38	611.762	3327.94	1536.59	514.877	452.134	90.4574
SRR5227625	eBL9	2473.99	1074.41	1693.44	1056.42	7978.27	4558.27	4011.77	1212.67	4860.37	3010.23	691.77	967.888	120.094
SRR5227638	eBL10	1914.07	949.5	1831.96	1070.82	8658.27	8009.71	3113.55	883.978	4108.61	2437.28	802.233	574.943	131.928
SRR5227639	eBL11	1077.41	327.946	736.601	363.475	2955.2	3079.43	1726.36	316.655	1914.87	842.612	349.578	285.494	37.9928
SRR5227627	eBL12	1188.87	516.736	884.534	551.096	4055.74	2938.36	1807.8	523.247	2162.27	1156.24	455.916	371.518	59.7353
SRR5227630	eBL13	3226.07	2113.33	2984.96	2341.55	8634.71	3324.76	5341.05	2152.27	6022.6	4134.03	1420.71	1533.57	181.771
SRR5227636	eBL14	1805.41	781.752	996.215	877.965	6221.95	6051.45	2682.55	637.681	4687.41	2053.68	503.997	525.074	104.901
SRR5227633	eBL15	978.522	350.999	554.938	421.738	3043.08	2811.82	1012.91	371.886	1684.13	753.709	255.653	218.874	57.0716
SRR5227632	eBL16	1117.65	445.669	745.384	396.86	3809.88	4368.55	1473.28	450.348	3609.75	1065.19	371.973	300.049	89.9654
SRR387432	sBL1	2215.74	859.021	1218.46	1004.56	6523.7	6261.54	2674.68	925.485	5257.41	2890.68	518.23	276.844	179.76
SRR387437	sBL2	3438.68	1285.04	1599.37	2212.41	6261.96	6553.27	3094.42	1652.4	3818.97	2352.77	978.399	328.552	176.647
SRR387427	sBL3	3748.5	2000.14	1360.02	2724.68	4649.82	8392.09	3294.86	2092.62	5231.82	2825.21	1228.06	567.835	100.596
SRR387430	sBL4	4017.74	1346.42	1985.01	2396.73	8408.44	4878.06	3117.17	1342.19	3575.24	2536.52	1149.86	408.311	199.445
