# Supplementary material for: Landscape of Epstein-Barr virus gene expression and perturbations in cancer
Source: Research Square preprint supplement (doi:10.21203/rs.3.rs-3911441/v1), 2024-02-02
Supplement: Supplementary file 4 [file 9db21490ec557ce3ec53bbd7.xlsx]

## Sheet: EBV_gene_cpm_Epi_AsBulk
Designation	PatientID	LMP-2A/LMP-2B/BNRF1	BCRF1	EBNA-3A	EBNA-1/3B/3C	BWRF1	EBNA-LP/EBNA-2	BHLF1	BHRF1	BFLF1/BFLF2	BFRF1/BFRF2/BFRF3	BOLF1/BPLF1	BORF1/BORF2	BaRF1/BMRF1/BMRF2	BSLF1/BSLF2/BMLF1	BSRF1	BLLF3	BLRF1/BLRF2	BLLF1/BLLF2	BZLF2	BRLF1/BZLF1	BRRF1	BRRF2	BKRF2/BKRF3/BKRF4	BBLF4	BBRF1/BBRF2	BBLF2/BBLF3	BBRF3	BGLF3/3.5/4/5/BBLF1	BGRF1/BDRF1	BDLF3.5/4/BGLF1/2	BDLF1/2/3	BcLF1	BcRF1/BTRF1	BXLF1/2	BXRF1/BVRF1	BVLF1	BVRF2/BdRF1	BILF2	RPMS1/BAREs	LF3	BILF1/LF1/LF2	BALF5	BALF3/4	BALF2	BALF1	BARF1	LMP-1/BNLF2a/BNLF2b	EBVcpm_EpiUMI
scNPC1	P01	0.327605	0.0163803	0	0.262084	0	0	0	0	0	0	0	0	0	0	0	0	0	0	0	0	0	0.0163803	0.0327605	0	0	0	0	0	0	0	0	0	0	0	0	0	0	0	27.4533	0.065521	0	0	0.0491408	0	0	0.180183	3.11225	31.5156
scNPC2	P02	9.25518	0	0	0.793301	0	0	0	0	0	0	0	0	0	0	0	0	0	0	0	0.264434	0	0	0	0	0	0	0	0	0	0	0	0	0	0	0	0	0	0	157.603	0	0.528868	0.264434	0.264434	0	0	1.85104	1164.83	1335.66
scNPC4	P04	0	0	0	0.650773	0	0	0	0	0	0	0	0	0	0	0	0	0	0	0	0	0	0	0	0	0	0	0	0	0	0	0.325387	0	0	0	0	0	0	0	2.92848	0	0	0	0.325387	0	0	0	0	4.23003
scNPC5	P05	9.05156	0.210501	0	0.210501	0	0	0	0	0	0	0	0	0	0	0	0	0	0	0	0.842006	0	0.210501	0	0	0	0	0	0	0	0	0	0	0	0	0	0	0	0	48.2048	1.05251	0.842006	0	2.31552	0.210501	2.31552	1.05251	4950.15	5016.67
scNPC6	P06	9.12175	0	0	0	0	0	0	0	0	0	0	0	0	0	0	0	0	0	0	0	0	0	0	0	0	0	0	0	0	0	0	0	0	0	0	0	0	0	102.843	0	0	0	0.357716	0	0.178858	0.894289	18.4224	131.818
scNPC7	P07	1.48244	0	0	0	0	0	0	0	0	0	0	0	0	0	0	0	0	0	0	0	0	0	0	0	0	0	0	0	0	0	0	0	0	0	0	0	0	0	4.44733	0	0	0	0	0	0	0	1.48244	7.41222
scNPC8	P08	0	0	0	0	0	0	0	0	0	0	0	0	0	0	0	0	0	0	0	0	0	0	0	0	0	0	0	0	0	0	0	0	0	0	0	0	0	0	71.2852	0	0	0	0	0	0	0	0	71.2852
scNPC9	P09	0	0	0	0	0	0	0	0	0	0	0	0	0	0	0	0	0	0	0	0	0	0	0	0	0	0	0	0	0	0	0	0	0	0	0	0	0	0	88.7823	0	0.77202	0	0.38601	0	0	0.77202	1.15803	91.8704
scNPC10	P10	0	0	0	0	0	0	0	0	0	0	0	0	0	0	0	0	0	0	0	0	0	0	0	0	0	0	0	0	0	0	0	0	0	0	0	0	0	0	5.40584	0	0	0	0	0	0	0	0	5.40584
scNPC11	P11	2.10739	0	0.0236785	0.355178	0.0236785	0	0	0	0	0	0	0	0	0	0	0	0	0	0	0	0	0.0473571	0	0	0	0	0	0	0	0	0.0236785	0.0236785	0	0	0	0	0	0	78.1392	0.0473571	0.0710356	0.0236785	0.544606	0.0236785	0.0236785	0.213107	5.91963	87.6106
scNPC12	P12	9.88284	0	0.0468381	0.515219	0	0	0	0	0	0	0	0	0	0	0	0	0	0	0	0	0	0	0	0	0	0.0936762	0	0	0	0	0	0	0	0.0468381	0	0	0	0	18.8289	1.03044	5.66741	0	0.0936762	0	0	0.0936762	8.29034	44.5899
scNPC13	P13	6.81391	0	0	0.123143	0	0	0	0.123143	0	0	0	0	0	0	0	0	0	0	0	0.0410477	0	0	0	0	0	0	0	0	0	0	0	0	0	0	0	0	0	0	73.3522	0.123143	0.123143	0	0.164191	0	0.0410477	0.205238	8.25058	89.3608
scNPC14	P14	0.542719	0	0	0.197352	0	0	0	0	0	0	0	0	0	0	0	0	0	0	0	0	0	0	0	0	0	0	0	0	0	0	0	0	0	0	0	0	0	0	44.0589	0.0493381	0	0.0493381	0.0493381	0.0493381	0	0.0986761	1.72683	46.8218
scNPC15	P15	0	0	0	0	0	0	0	0	0	0	0	0	0	0	0	0	0	0	0	0	0	0	0	0	0	0	0	0	0	0	0	0	0	0	0	0	0	0	0	0	0	0	0	0	0	0	0.739268	0.739268
scNPC16	NPC33	0	0	0	0	0	0	0	0	0	0	0	0	0	0	0	0	0	0	0	0	0	0	0	0	0	0	0	0	0	0	0	0	0	0	0	0	0	0	125.238	0	0	0	0	0	0	0	0	125.238
scNPC17	NPC36	4.85937	0	0	0	0	0	0	0	0	0	0	0	0	0	0	0	0	0	0	0.441761	0	0	0	0	0	0	0	0	0	0	0	0	0	0	0	0	0	0	105.139	0.441761	0	0.441761	0.441761	0	0	0	358.268	470.034
scNPC18	NPC46	6.95479	0	0	0.204553	0	0	0	0	0	0	0	0	0	0	0	0	0	0	0	0.613658	0	0	0	0	0	0	0	0	0	0	0	0	0	0	0	0	0	0	78.5483	0	0.204553	0	0	0	0.204553	0	4749.92	4836.65
scNPC19	NPC47	0.775497	0	0	0.897944	0	0	0	0	0	0	0	0	0	0	0	0	0.0408156	0	0	0.0408156	0	0	0	0	0	0	0	0	0	0	0	0	0	0	0	0	0	0.0408156	71.8355	1.63263	0.122447	0.0408156	0.163263	0.0816313	0	0.285709	61.8357	137.794
scNPC21	NPC50	0	0	0	0	0	0	0	0	0	0	0	0	0	0	0	0	0	0	0	0	0	0	0	0	0	0	0	0	0	0	0	0	0	0	0	0	0	0	21.7402	0	0	0	0	0	0	5.43505	402.194	429.369
scNPC23	NPC58	1.76387	0	0	0.352774	0	0	0	0	0	0	0	0	0	0	0	0	0	0	0	0.0371341	0	0	0.018567	0	0	0	0	0	0	0	0	0	0	0	0	0	0	0.0371341	108.209	0.111402	0.18567	0.111402	0.278505	0.0371341	0	0.222804	4.04761	115.413
scNPC24	NPC59	1.5691	0	0	0	0	0	0	0	0	0	0	0	0	0	0	0	0	0	0	0	0	0	0	0	0	0	0	0	0	0	0	0	0	0	0	0	0	0	7.06094	0	0.392275	0	0	0	0	0	14.1219	23.1442
scNPC25	NPC60	1.32848	0	0	0.442827	0	0	0	0	0	0	0	0	0	0	0	0	0	0	0	0	0	0	0	0	0	0	0	0	0	0	0	0	0	0	0	0	0	0	25.684	0	0	0	0	0	0	0	46.0541	73.5094
scNPC26	NPC62	50.1562	0	0	0.194404	0	0	0	0	0	0	0	0	0	0	0	0	0	0	0	0	0	0	0	0	0	0	0	0	0	0	0	0	0	0	0	0	0	0	117.031	0.777616	0.583212	0.388808	0.777616	0	0.194404	0	25.0781	195.182
scNPC28	NPC64	1.78538	0	0	0	0	0	0	0	0	0	0	0	0	0	0	0	0	0	0	0.198375	0	0	0.198375	0	0	0	0	0	0	0	0	0	0	0	0	0	0	0	40.0718	0.198375	0	0	0	0	0	0.595126	2.57888	45.6263
scNPC29	NPC65	0	0	0	0	0	0	0	0	0	0	0	0	0	0	0	0	0	0	0	0	0	0	0	0	0	0	0	0	0	0	0	0	0	0	0	0	0	0	0.258973	0	0	0	0	0	0	0	0.517947	0.77692
scNPC30	NPC66	0	0	0	0	0	0	0	0	0	0	0	0	0	0	0	0	0	0	0	0	0	0	0	0	0	0	0	0	0	0	0	0	0	0	0	0	0	0	64.9961	0	0	0	0	0	0	0	152.199	217.195
scNPC31	NPC69	0	0	0	0	0	0	0	0	0	0	0	0	0	0	0	0	0	0	0	0	0	0	0	0	0	0	0	0	0	0	0	0	0	0	0	0	0	0	37.6098	0	0	0	0	0	0	0	0	37.6098
scNPC32	scNPC1802_Epi	2.72344	0	0	0.179963	0	0	0	0	0	0	0	0	0	0	0	0	0	0	0	0.0839827	0	0	0.0119975	0	0	0	0	0	0	0	0	0	0	0.0119975	0	0	0.0119975	0	7.51046	0	0.215956	0.0719852	0.239951	0.0119975	0.0239951	0.119975	34.3609	45.5786
scNPC33	scNPC1805_Epi	0.502474	0	0	0.0218467	0	0.0436934	0	0	0	0	0	0.0218467	1.72589	0	0	0	0.0218467	0	0	0.39324	0	0	0	0	0	0	0	0	0	0	0	0	0	0	0	0	0	0	5.96415	0	0.0436934	0	0.152927	0.305854	0.305854	0.109233	72.2907	81.9032
scNPC34	scNPC1806_Epi	0.0837245	0	0	0	0	0	0	0	0	0	0	0	0	0	0	0	0	0	0	0.111633	0	0	0	0	0	0	0	0	0	0	0	0	0	0	0	0	0	0	0.279082	0	0.0279082	0	0	0	0	0	1.50704	2.00939
scNPC35	scNPC1807_Epi	0.886947	0.0211178	0	0	0	0	0	0	0	0	0	0	0.0211178	0	0	0	0	0	0	1.07701	0	0	0	0	0	0	0	0	0	0	0	0	0	0	0	0	0	0	1.81613	0	0.0422356	0.0211178	0	0	0.0422356	0.0211178	52.0976	56.0466
scNPC36	scNPC1808_Epi	0.0498933	0	0	0	0	0	0	0	0	0	0	0	0	0	0	0	0	0	0	0.0166311	0	0	0	0	0	0	0	0	0	0	0	0	0	0	0	0	0	0	0.332622	0	0	0	0	0	0	0	0.532195	0.931341
scNPC37	scNPC1810_Epi	0.373824	0	0	0	0	0	0	0	0	0	0	0	0	0	0	0	0	0	0	0	0	0	0	0	0	0	0	0	0	0	0	0	0	0	0	0	0	0	5.28027	0	0	0.046728	0.093456	0	0	0	29.9994	35.7937
scNPC38	scNPC1811_Epi	0.306137	0	0	0	0	0	0	0	0	0	0	0	0	0	0	0	0	0	0	0	0	0	0	0	0	0	0	0	0	0	0	0	0	0	0	0	0	0	0.918411	0	0.131202	0	0.131202	0.0437339	0	0	0.962145	2.49283
scNPC39	scNPC1813_Epi	3.09876	0	0	0.0893874	0	0	0.0297958	0	0	0	0	0	0	0	0	0	0	0	0	0.148979	0	0	0	0	0	0	0	0	0	0	0	0	0	0	0	0	0	0	25.4754	0	0.119183	0.208571	0.476733	0.0297958	0.0893874	0.297958	295.872	325.936
scNPC40	scNPC1815_Epi	0.435	0.02175	0.02175	0.0435	0	0	0	0	0	0	0	0	0	0	0	0	0	0	0	0	0	0	0	0	0	0	0	0	0	0	0	0	0	0	0	0	0	0	2.523	0	0.10875	0.02175	0.06525	0	0	0.02175	0.15225	3.41475
scNPC41	scNPC1816_Epi	7.69681	0	0	0.304129	0	0	0	0	0	0	0	0	0.0233946	0	0.0233946	0	0	0	0	0.0701837	0	0.0233946	0.0233946	0	0	0	0	0	0	0	0	0	0	0	0	0	0	0.187157	51.8658	0.0233946	1.12294	0.397708	1.02936	0.163762	0.0467891	0.374313	41.5955	104.971
scNPC43	Patient02	1.70634	0	0	0.426585	0	0	0	0	0	0	0	0	0	0	0	0	0	0	0	0	0	0	0	0	0	0	0	0	0	0	0	0	0	0	0	0	0	0	21.3292	0	0.85317	0.85317	0	0	0.426585	0	2.13292	27.728
scNPC44	Patient03	4.81393	0	0	0	0	0	0	0	0	0	0	0	0	0	0	0	0	0	0	0	0	0	0	0	0	0	0	0	0	0	0	0	0	0	0	0	0	0	67.395	0	0	3.20928	1.60464	0	0	0	51.3485	128.371
scNPC45	Patient04	0	0	0	0	0	0	0	0	0	0	0	0	0	0	0	0	0	0	0	0	0	0	0	0	0	0	0	0	0	0	0	0	0	0	0	0	0	0	0	0	0	0	0	0	0	0	0	0
scNPC46	Patient05	2.56616	0	0	0	0	0	0	0	0	0	0	0	0	0	0	0	0	0	0	0	0	0	0	0	0	0	0	0	0	0	0	0	0	0	0	0	0	0	73.3922	0	0.513232	0.513232	0.513232	0	0	0	59.535	137.033
scNPC48	Patient07	0	0	0	0	0	0	0	0	0	0	0	0	0	0	0	0	0	0	0	0	0	0	0	0	0	0	0	0	0	0	0	0	0	0	0	0	0	0	12.1476	0	0	0	0	0	0	0	0	12.1476
scNPC49	Patient08	45.0086	0	0	0	0	0	0	0	0	0	0	0	0	0	0	0	0	0	0	0	0	0	0	0	0	0	0	0	0	0	0	0	0	0	0	0	0	0	120.023	0	0	0	15.0029	0	0	0	360.068	540.103
scNPC50	Patient09	2.17551	0	0	0	0	0	0	0	0	0	0	0	0	0	0	0	0	0	0	0	0	0	0	0	0	0	0	0	0	0	0	0	0	0	0	0	0	0	8.70202	0	0	0.310787	0.310787	0	0	0	3.41865	14.9178
scNPC52	Patient14	0	0	0	0	0	0	0	0	0	0	0	0	0	0	0	0	0	0	0	0	0	0	0	0	0	0	0	0	0	0	0	0	0	0	0	0	0	0	0	0	0	0	0	0	0	0	0	0
