# Supplementary material for: Landscape of Epstein-Barr virus gene expression and perturbations in cancer
Source: Research Square preprint supplement (doi:10.21203/rs.3.rs-3911441/v1), 2024-02-02
Supplement: Supplementary file 5 [file cad8887efd31e021f6ad03ea.xlsx]

## Sheet: Overview
Type	Name	Abbreviation	Samples	EBV+	Designation	Reference	Sequencing Library	Source
Cancer	gastric adenocarcinoma	GAC	453	30	TCGA_Stomach	phs000178	polyA+	Primary tumor
Cancer	nasopharyngeal carcinoma	NPC	113	106	GSE102349	DOI: 10.1158/1541-7786.MCR-17-0134	polyA+	Primary tumor
Cancer	endemic Burkitt’s lymphoma	eBL	21	16	PRJNA369585	DOI: 10.1158/1541-7786.MCR-16-0305	stranded polyA+	Fine needle aspiration
Cancer	sporadic Burkitt’s lymphoma	sBL	28	4	SRP009316	https://doi.org/10.1038/nature11378	polyA+	Primary tumor
Cell line	EBV lymphoma cell lines	ECL	13	5	SRP009316	https://doi.org/10.1038/nature11378	polyA+	Tissue culture
Cell line	C666-1	ECL	1	1	SRR8133536	https://www.ncbi.nlm.nih.gov//bioproject/PRJNA501807	polyA+	Tissue culture
Cell line	lymphoblastoid cell line	LCL	47	47	PRJEB3366	https://doi.org/10.1016/j.chom.2012.06.008	polyA+	Tissue culture

## Sheet: NPC
Designation	Sample ID	Reads	EBV reads	EBV ppm	BamHI-A/I reads	% BamHI-A/I	% EBV mapped reads
NPC1	SRR5908786	115657450	130847	1131.33	128643	0.983156	0.980052
NPC2	SRR5908766	108731134	118995	1094.4	115109	0.967343	0.980593
NPC3	SRR5908804	133013444	137166	1031.22	86283	0.629041	0.952003
NPC4	SRR5908757	111513820	111545	1000.28	109274	0.979641	0.974224
NPC5	SRR5908775	123262192	117682	954.73	111464	0.947163	0.981034
NPC6	SRR5908803	126191384	102205	809.92	99016	0.968798	0.977576
NPC7	SRR5908853	131416738	101711	773.96	100092	0.984082	0.983555
NPC8	SRR5908771	126794644	96944	764.57	87892	0.906627	0.977187
NPC9	SRR5908841	117376214	77767	662.54	75088	0.965551	0.977639
NPC10	SRR5908837	130758340	71310	545.36	64546	0.905147	0.978589
NPC11	SRR5908763	121953658	59034	484.07	57863	0.980164	0.982267
NPC12	SRR5908794	119616024	56537	472.65	56174	0.993579	0.977801
NPC13	SRR5908813	107366556	47474	442.17	46363	0.976598	0.981665
NPC14	SRR5908758	112527654	47972	426.31	38991	0.812787	0.985759
NPC15	SRR5908747	126305732	51209	405.44	47122	0.92019	0.978255
NPC16	SRR5908762	115957936	46445	400.53	43071	0.927355	0.975173
NPC17	SRR5908754	108440508	42631	393.13	41775	0.979921	0.981844
NPC18	SRR5908795	99660004	38755	388.87	37273	0.96176	0.981699
NPC19	SRR5908811	128277112	48184	375.62	44424	0.921966	0.973195
NPC20	SRR5908834	103422596	36995	357.71	36077	0.975186	0.980743
NPC21	SRR5908836	103086746	34702	336.63	32205	0.928044	0.97923
NPC22	SRR5908833	105425234	35343	335.24	31617	0.894576	0.979205
NPC23	SRR5908846	132859184	44209	332.75	41255	0.933181	0.979577
NPC24	SRR5908781	132661704	41683	314.21	37588	0.901759	0.963756
NPC25	SRR5908800	96371060	29347	304.52	25635	0.873513	0.983682
NPC26	SRR5908819	142416762	42083	295.49	38454	0.913766	0.97735
NPC27	SRR5908815	101978048	29282	287.14	24214	0.826924	0.977849
NPC28	SRR5908840	115716660	32511	280.95	31254	0.961336	0.97024
NPC29	SRR5908796	113664140	30691	270.01	30343	0.988661	0.979019
NPC30	SRR5908848	107528878	27477	255.53	24341	0.885868	0.976013
NPC31	SRR5908806	133838886	34011	254.12	32267	0.948722	0.97752
NPC32	SRR5908825	114493080	28464	248.61	24532	0.861861	0.969088
NPC33	SRR5908850	131577182	32111	244.05	29659	0.92364	0.979306
NPC34	SRR5908760	106860834	25126	235.13	23746	0.945077	0.978908
NPC35	SRR5908807	117418530	27601	235.07	26625	0.964639	0.973855
NPC36	SRR5908764	104332678	24009	230.12	21655	0.901953	0.973592
NPC37	SRR5908856	110357204	25256	228.86	24298	0.962068	0.982025
NPC38	SRR5908808	94857988	21453	226.16	20868	0.972731	0.979394
NPC39	SRR5908789	106307158	23945	225.24	19909	0.831447	0.972632
NPC40	SRR5908798	124097488	27402	220.81	27101	0.989015	0.97987
NPC41	SRR5908810	129230322	27532	213.05	26735	0.971052	0.985966
NPC42	SRR5908767	134263378	28586	212.91	27857	0.974498	0.979898
NPC43	SRR5908809	128011736	26909	210.21	26629	0.989595	0.976615
NPC44	SRR5908799	115473060	22452	194.43	20148	0.897381	0.975085
NPC45	SRR5908791	118974310	22496	189.08	18228	0.810277	0.970846
NPC46	SRR5908788	121328438	22803	187.94	22343	0.979827	0.983426
NPC47	SRR5908784	100615566	18720	186.05	16779	0.896314	0.978247
NPC48	SRR5908845	105063260	19504	185.64	18886	0.968314	0.976728
NPC49	SRR5908797	124740070	22218	178.11	20214	0.909803	0.975455
NPC50	SRR5908814	107280032	18777	175.03	17886	0.952548	0.98028
NPC51	SRR5908854	120758178	20811	172.34	20344	0.97756	0.984889
NPC52	SRR5908802	106911808	18301	171.18	17333	0.947107	0.976227
NPC53	SRR5908756	92074098	15760	171.17	14795	0.938769	0.976638
NPC54	SRR5908790	122246014	20441	167.21	19267	0.942566	0.981543
NPC55	SRR5908769	123890646	20541	165.8	20057	0.976437	0.979027
NPC56	SRR5908776	142460440	22790	159.97	10605	0.465336	0.950963
NPC57	SRR5908849	100263560	15981	159.39	14571	0.91177	0.974089
NPC58	SRR5908818	131362742	20865	158.83	19111	0.915936	0.97891
NPC59	SRR5908820	134665894	21367	158.67	20444	0.956803	0.978166
NPC60	SRR5908821	116617434	18377	157.58	16271	0.8854	0.967103
NPC61	SRR5908829	126785818	19720	155.54	18911	0.958976	0.970702
NPC62	SRR5908826	116856326	18038	154.36	16265	0.901708	0.983436
NPC63	SRR5908773	122591898	18514	151.02	17901	0.96689	0.974373
NPC64	SRR5908753	120425860	17990	149.39	17618	0.979322	0.974574
NPC65	SRR5908759	113581440	16478	145.08	15226	0.92402	0.971498
NPC66	SRR5908774	106763088	15268	143.01	14647	0.959327	0.976963
NPC67	SRR5908827	105736192	15043	142.27	14400	0.957256	0.977899
NPC68	SRR5908782	103330384	13588	131.5	11772	0.866353	0.979243
NPC69	SRR5908779	122538144	16111	131.48	15178	0.942089	0.978763
NPC70	SRR5908839	127517906	16396	128.58	15775	0.962125	0.977248
NPC71	SRR5908855	128666256	16455	127.89	15717	0.95515	0.977076
NPC72	SRR5908748	132616334	16901	127.44	16141	0.955032	0.962562
NPC73	SRR5908787	105929714	13278	125.35	12991	0.978385	0.985573
NPC74	SRR5908750	115079272	14283	124.11	9050	0.63362	0.964291
NPC75	SRR5908777	135057596	16739	123.94	10564	0.631101	0.967624
NPC76	SRR5908844	106305038	13130	123.51	11368	0.865804	0.968722
NPC77	SRR5908859	98884604	12209	123.47	9191	0.752805	0.976893
NPC78	SRR5908749	137641578	16628	120.81	15881	0.955076	0.981838
NPC79	SRR5908780	126166660	14135	112.03	13802	0.976441	0.97866
NPC80	SRR5908768	135754802	15182	111.83	14932	0.983533	0.980805
NPC81	SRR5908783	137723952	14419	104.69	12649	0.877245	0.977314
NPC82	SRR5908830	120479966	12454	103.37	4719	0.378914	0.934259
NPC83	SRR5908778	126403402	12828	101.48	12271	0.956579	0.980203
NPC84	SRR5908843	114470394	11413	99.7	9723	0.851923	0.978794
NPC85	SRR5908805	139555418	13373	95.83	13033	0.974576	0.973327
NPC86	SRR5908851	125390636	11932	95.16	8506	0.712873	0.968001
NPC87	SRR5908822	105409686	10017	95.03	9772	0.975542	0.97788
NPC88	SRR5908752	91763496	8129	88.59	7782	0.957313	0.976756
NPC89	SRR5908765	126656606	10666	84.21	10300	0.965685	0.979104
NPC90	SRR5908761	92129292	7437	80.72	6959	0.935727	0.979312
NPC91	SRR5908823	127023754	9978	78.55	7138	0.715374	0.959473
NPC92	SRR5908755	132410112	10323	77.96	5390	0.522135	0.967095
NPC93	SRR5908772	93512626	6779	72.49	6629	0.977873	0.98471
NPC94	SRR5908857	104651110	7082	67.67	4370	0.617057	0.959248
NPC95	SRR5908751	134376616	9088	67.63	8617	0.948173	0.972473
NPC96	SRR5908793	119331780	7906	66.25	7226	0.913989	0.967498
NPC97	SRR5908852	112720712	7260	64.41	1775	0.24449	0.962315
NPC98	SRR5908816	108755954	6094	56.03	5528	0.907122	0.977057
NPC99	SRR5908831	95132466	5049	53.07	4762	0.943157	0.981525
NPC100	SRR5908801	125987460	6582	52.24	3206	0.487086	0.966061
NPC101	SRR5908847	118715586	4955	41.74	4494	0.906963	0.972099
NPC102	SRR5908817	134516744	5292	39.34	1151	0.217498	0.889642
NPC103	SRR5908824	119863286	3301	27.54	3204	0.970615	0.978903
NPC104	SRR5908812	121156680	2549	21.04	1838	0.721067	0.955607
NPC105	SRR5908792	115588098	1795	15.53	1579	0.879666	0.959161
NPC106	SRR5908835	101400450	1460	14.4	1113	0.762329	0.964626
NPC107	SRR5908842	119334530	1129	9.46	491	/	/
NPC108	SRR5908832	93634376	865	9.24	784	/	/
NPC109	SRR5908858	119384118	1076	9.01	1041	/	/
NPC110	SRR5908785	102897692	405	3.94	347	/	/
NPC111	SRR5908828	126229998	81	0.64	45	/	/
NPC112	SRR5908838	106166620	35	0.33	29	/	/
NPC113	SRR5908770	116449062	28	0.24	28	/	/

## Sheet: GAC
Designation	Sample ID	Reads	EBV reads	EBV ppm	BamHI-A/I reads	% BamHI-A/I	% EBV mapped reads
GAC1	TCGA-BR-8686-01A	112158292	37123	330.99	35969	0.968914	0.973352
GAC2	TCGA-HU-A4G6-01A	254580050	57737	226.79	54773	0.948664	0.982189
GAC3	TCGA-BR-A4J4-01A	211141594	44648	211.46	41660	0.933077	0.98003
GAC4	TCGA-HU-A4H0-01A	233088508	47477	203.69	45972	0.9683	0.978999
GAC5	TCGA-D7-A4YX-01A	209367314	40451	193.21	39841	0.98492	0.982539
GAC6	TCGA-VQ-A923-01A	194415242	37012	190.38	36408	0.983681	0.983607
GAC7	TCGA-BR-8589-01A	111821864	21192	189.52	20085	0.947763	0.97785
GAC8	TCGA-BR-4253-01A	150800106	27805	184.38	26161	0.940874	0.955007
GAC9	TCGA-VQ-A8PF-01A	188998018	22260	117.78	21528	0.967116	0.982726
GAC10	TCGA-VQ-AA69-01A	194962240	21213	108.81	20477	0.965304	0.980704
GAC11	TCGA-CD-5801-01A	111668452	11979	107.27	11162	0.931797	0.985647
GAC12	TCGA-HU-8608-01A	181145010	18473	101.98	18169	0.983544	0.973607
GAC13	TCGA-D7-8573-01A	191227878	18919	98.93	17498	0.92489	0.979265
GAC14	TCGA-D7-5577-01A	112177588	10270	91.55	9500	0.925024	0.981538
GAC15	TCGA-BR-8381-01A	137108060	12545	91.5	10697	0.85269	0.965195
GAC16	TCGA-BR-6455-01A	190979924	17305	90.61	16495	0.953193	0.983748
GAC17	TCGA-BR-8366-01A	210959470	18653	88.42	14429	0.773548	0.973285
GAC18	TCGA-BR-6707-01A	117938736	9863	83.63	9434	0.956504	0.983712
GAC19	TCGA-VQ-A91W-01A	248131510	20420	82.3	18604	0.911068	1
GAC20	TCGA-HU-A4G2-01A	230720318	18348	79.52	15430	0.840964	0.989106
GAC21	TCGA-B7-5818-01A	124828410	9080	72.74	8759	0.964648	0.981944
GAC22	TCGA-BR-7196-01A	186682036	12468	66.79	11131	0.892765	0.973628
GAC23	TCGA-FP-7998-01A	207239674	13343	64.38	12058	0.903695	0.967762
GAC24	TCGA-FP-7916-01A	197193838	10051	50.97	9651	0.960203	0.970553
GAC25	TCGA-BR-6706-01A	189933200	9520	50.12	7924	0.832353	0.961778
GAC26	TCGA-D7-A6EZ-01A	161856134	7809	48.25	7184	0.919964	0.980774
GAC27	TCGA-CG-5722-01A	130342242	4190	32.15	3459	0.825537	0.96541
GAC28	TCGA-BR-7958-01A	80810816	2517	31.15	2323	0.922924	0.973479
GAC29	TCGA-D7-8570-01A	198683432	4369	21.99	3609	0.826047	0.965769
GAC30	TCGA-B7-A5TK-01A	179271256	2745	15.31	2364	0.861202	1
GAC31	TCGA-BR-8676-01A	89854204	355	3.95	49	/	/

## Sheet: eBL
Designation	Sample ID	Reads	EBV reads	EBV ppm	BamHI-A/I reads	% BamHI-A/I	% EBV mapped reads	Forward BamHI-A/I reads	Reverse BamHI-A/I reads	% Forward reads in BamHI A/I
eBL1	SRR5227642	21214496	9962	469.58	4383	0.439972	0.973576	4375	8	99,82%
eBL2	SRR5227624	25913800	10157	391.95	9881	0.972827	0.990743	9881	0	100,00%
eBL3	SRR5227631	101374540	34411	339.44	31807	0.924327	0.981815	31744	63	99,80%
eBL4	SRR5227640	23165034	5576	240.71	5253	0.942073	0.990971	5247	6	99,89%
eBL5	SRR5227621	17209056	2991	173.8	1015	0.339351	0.899534	918	97	90,44%
eBL6	SRR5227635	23109100	3129	135.4	3055	0.97635	0.992337	3051	4	99,87%
eBL7	SRR5227637	21423994	1938	90.46	1746	0.900929	0.981481	1744	2	99,89%
eBL8	SRR5227620	19457072	1459	74.99	1414	0.969157	0.99726	1414	0	100,00%
eBL9	SRR5227625	21936878	1606	73.21	1546	0.96264	0.983931	1546	0	100,00%
eBL10	SRR5227638	22199612	1342	60.45	1302	0.970194	0.991137	1302	0	100,00%
eBL11	SRR5227639	18983586	924	48.67	865	0.936147	0.986985	863	2	99,77%
eBL12	SRR5227627	25634856	1173	45.76	1076	0.917306	0.988115	1074	2	99,81%
eBL13	SRR5227630	99209938	4160	41.93	3576	0.859615	0.978994	3570	6	99,83%
eBL14	SRR5227636	20286884	714	35.2	564	0.789916	0.964286	559	5	99,11%
eBL15	SRR5227633	21443554	604	28.17	560	0.927152	0.990164	560	0	100,00%
eBL16	SRR5227632	22923910	420	18.32	341	0.811905	0.981132	341	0	100,00%
eBL17	SRR5227634	19306696	170	8.81	136	/	/	136	0	/
eBL18	SRR5227641	19931600	95	4.77	10	/	/	8	2	/
eBL19	SRR5227628	18654922	65	3.48	27	/	/	27	0	/
eBL20	SRR5227629	20739942	42	2.03	36	/	/	36	0	/
eBL21	SRR5227622	21356292	11	0.52	0	/	/	0	0	/

## Sheet: sBL
Designation	Sample ID	Reads	EBV reads	EBV ppm	BamHI-A/I reads	% BamHI-A/I	% EBV mapped reads
sBL1	SRR387432	186797498	93780	502.04	90323	0.963137	0.976281
sBL2	SRR387437	128606856	31723	246.67	30771	0.96999	0.984538
sBL3	SRR387427	118169772	27696	234.37	25883	0.934539	0.988663
sBL4	SRR387430	152817648	22832	149.41	18776	0.822355	0.968117
sBL5	SRR387447	143597070	107	0.75	27	/	/
sBL6	SRR387428	149442200	99	0.66	25	/	/
sBL7	SRR387448	182167370	115	0.63	12	/	/
sBL8	SRR387434	123603342	73	0.59	10	/	/
sBL9	SRR387431	41260994	22	0.53	16	/	/
sBL10	SRR387439	38086700	20	0.53	0	/	/
sBL11	SRR387443	171011836	89	0.52	10	/	/
sBL12	SRR387433	120110750	58	0.48	44	/	/
sBL13	SRR387444	144334984	62	0.43	33	/	/
sBL14	SRR387438	165108312	66	0.4	12	/	/
sBL15	SRR387441	160805072	64	0.4	14	/	/
sBL16	SRR387445	185293302	71	0.38	14	/	/
sBL17	SRR387435	128246034	43	0.34	20	/	/
sBL18	SRR387429	116280992	28	0.24	7	/	/
sBL19	SRR387426	154232640	35	0.23	21	/	/
sBL20	SRR387436	118850446	25	0.21	12	/	/
sBL21	SRR387442	113621940	18	0.16	9	/	/
sBL22	SRR387418	152283912	22	0.14	2	/	/
sBL23	SRR387440	150375188	21	0.14	13	/	/
sBL24	SRR387406	163006586	12	0.07	0	/	/
sBL25	SRR387446	165710932	5	0.03	2	/	/
sBL26	SRR387405	163289232	4	0.02	0	/	/
sBL27	SRR387407	190618152	4	0.02	0	/	/
sBL28	SRR387404	137178280	2	0.01	0	/	/

## Sheet: ECL
Designation	Sample ID	Name	Reads	EBV reads	EBV ppm	BamHI-A/I reads	% BamHI-A/I	% EBV mapped reads
ECL1	SRR387401	Daudi	220998438	63105	285.55	12263	0.194327	0.924838
ECL2	SRR8133536	C666-1	148765376	38886	261.391	34855	0.896338	0.977524
ECL3	SRR387394	Raji	41650616	7993	191.91	162	0.0202677	0.927287
ECL4	SRR387396	Namalwa	54999456	10427	189.58	960	0.0920687	0.926612
ECL5	SRR387403	BL58	248052978	37592	151.55	712	0.0189402	0.893936
ECL6	SRR387393	BL41	49870028	6724	134.83	339	0.0504164	0.94759
ECL7	SRR387392	Gumbus	51061602	88	1.72	54	/	/
ECL8	SRR387400	CA46	114944946	87	0.76	47	/	/
ECL9	SRR387399	BL30	194978608	62	0.32	30	/	/
ECL10	SRR387402	BL2	184615534	49	0.27	35	/	/
ECL11	SRR387293	Thomas	55541934	13	0.23	2	/	/
ECL12	SRR387395	Ramos	53813394	12	0.22	2	/	/
ECL13	SRR387398	BL70	48743402	3	0.06	1	/	/
ECL14	SRR387397	EW	52110516	0	0	0	/	/

## Sheet: LCL
Designation	Sample ID	Reads	EBV reads	EBV ppm	BamHI-A/I reads	% BamHI-A/I	% EBV mapped reads
LCL1	ERR188073	58064208	983951	16945.9	23757	0.0241445	0.840063
LCL2	ERR188063	113968444	1483098	13013.2	40634	0.0273981	0.855026
LCL3	ERR188060	28031042	272430	9718.87	7627	0.0279962	0.779872
LCL4	ERR188049	50456420	460105	9118.86	12640	0.027472	0.838356
LCL5	ERR188032	60769830	406767	6693.57	21177	0.0520617	0.866417
LCL6	ERR188044	71634372	460376	6426.75	17617	0.0382665	0.855882
LCL7	ERR188023	71779740	443151	6173.76	17627	0.0397765	0.834571
LCL8	ERR188066	92660318	495748	5350.17	18241	0.0367949	0.852029
LCL9	ERR188028	41369892	211448	5111.16	9974	0.04717	0.854952
LCL10	ERR188043	81192646	405636	4995.97	19362	0.0477324	0.86318
LCL11	ERR188065	60758832	303020	4987.26	14474	0.0477658	0.874518
LCL12	ERR188062	44992848	222028	4934.74	5187	0.0233619	0.884468
LCL13	ERR188061	59307948	281526	4746.85	44643	0.158575	0.87093
LCL14	ERR188064	36564076	173087	4733.8	7376	0.0426144	0.876767
LCL15	ERR188056	71087404	319322	4491.96	12581	0.0393991	0.86138
LCL16	ERR188029	79554018	325994	4097.77	13965	0.0428382	0.851971
LCL17	ERR188045	62414726	251406	4027.99	15261	0.0607026	0.834734
LCL18	ERR188024	46708792	184543	3950.93	18965	0.102767	0.852114
LCL19	ERR188046	60575262	237840	3926.36	11253	0.0473133	0.882255
LCL20	ERR188047	73971478	272357	3681.92	15909	0.0584123	0.801912
LCL21	ERR188068	45769316	167343	3656.23	7893	0.0471666	0.883506
LCL22	ERR188033	52890838	187878	3552.18	10265	0.0546365	0.870658
LCL23	ERR188070	59943186	211804	3533.41	12245	0.0578129	0.865263
LCL24	ERR188055	70884394	226409	3194.06	11895	0.0525377	0.873221
LCL25	ERR188058	54462978	165657	3041.64	5670	0.0342273	0.880307
LCL26	ERR188057	74134846	214146	2888.6	6253	0.0291997	0.842423
LCL27	ERR188038	55762952	155178	2782.82	7689	0.0495495	0.883498
LCL28	ERR188042	50438826	140356	2782.7	14646	0.104349	0.868364
LCL29	ERR188041	78832278	197031	2499.37	10931	0.0554786	0.863274
LCL30	ERR188052	69739518	160888	2306.98	7078	0.0439933	0.824871
LCL31	ERR188025	69165690	159034	2299.32	4402	0.0276796	0.855347
LCL32	ERR188034	32591754	69453	2131	2012	0.0289692	0.874086
LCL33	ERR188021	63538948	126883	1996.93	6698	0.0527888	0.869553
LCL34	ERR188054	69818424	139162	1993.2	6281	0.0451344	0.824288
LCL35	ERR188027	56865226	106056	1865.04	11960	0.112771	0.866529
LCL36	ERR188053	46339716	82497	1780.27	3640	0.0441228	0.850555
LCL37	ERR188036	68276034	107972	1581.4	8712	0.0806876	0.843029
LCL38	ERR188072	63745718	100799	1581.27	5676	0.0563101	0.884321
LCL39	ERR188071	39638158	57961	1462.25	5934	0.102379	0.859031
LCL40	ERR188050	60272072	78507	1302.54	6697	0.0853045	0.893092
LCL41	ERR188040	53670580	63557	1184.21	4554	0.0716522	0.90742
LCL42	ERR188059	56202904	65954	1173.5	4272	0.0647724	0.899326
LCL43	ERR188069	48344686	55419	1146.33	3494	0.063047	0.885856
LCL44	ERR188067	83669952	82501	986.03	18259	0.221319	0.902326
LCL45	ERR188048	66568848	64563	969.87	3555	0.0550625	0.898253
LCL46	ERR188051	40388936	39110	968.33	2194	0.0560982	0.907893
LCL47	ERR188037	42097744	34349	815.93	5247	0.152756	0.902619

## Sheet: scNPC
Study no.	Designation	ID	Method	# total cell_[200,9000genes/cell)	# EBV+ cell	TotalUMIcount	EpiUMI	NonEpiUMI	AverageUMI/cell	#EBV_UMI (all)	EBERish/Ab	EBVcpm_totalUMI	EBVcpm_EpiUMI	EBVcpm_EBV+EpiUMI	Notes
1	scNPC1	P1	3' v2	6723	850	107266586	61049111	46217475	15955.2	2275	+	21.2088	31.5156	41.0953	scNPC: single cell Nasopharyngeal carcinoma
1	scNPC2	P2	3' v2	6914	1339	46581701	3781665	42800036	6737.3	6939	+	148.964	1335.66	1356.86	scNT: single cell non-tumor
1	scNPC3	P3	3' v2	10674	0	68881591			6453.21	0	-
1	scNPC4	P4	3' v2	2423	21	15838521	3073267	12765254	6536.74	42	+	2.65176	4.23003	51.1432
1	scNPC5	P5	3' v2	7262	3698	43816386	4750560	39065826	6033.65	31292	+	714.162	5016.67	5059.8
1	scNPC6	P6	3' v2	8374	326	37268732	5591032	31677700	4450.53	927	+	24.8734	131.818	174.526
1	scNPC7	P7	3' v2	7896	4	24133852	674562	23459290	3056.47	5	+	0.207178	7.41222	171.827
1	scNPC8	P8	3' v2	13207	36	44143770	631267	43512503	3342.45	53	+	1.20062	71.2852	131.481
1	scNPC9	P9	3' v2	3462	97	24383310	2590607	21792703	7043.13	310	+	12.7136	91.8704	131.905
1	scNPC10	P10	3' v2	4637	8	20055920	739941	19315979	4325.19	11	-	0.548466	5.40584	114.312
1	scNPC11	P11	3' v2	12884	2718	71701718	42232338	29469380	5565.18	10196	+	142.2	87.6106	140.885
1	scNPC12	P12	3' v2	12650	1246	62846758	21350147	41496611	4968.12	4139	+	65.8586	44.5899	106.423
1	scNPC13	P13	3' v2	8765	1180	55140391	24361915	30778476	6290.97	2525	+	45.7922	89.3608	153.375
1	scNPC14	P14	3' v2	22955	454	116575098	20268331	96306767	5078.42	1197	+	10.2681	46.8218	104.753
1	scNPC15	P15	3' v2	18684	7	71751418	2705380	69046038	3840.26	11	+	0.153307	0.739268	1721.17
1	scNT1	N1	3' v2	15304	0	57514328			3758.12	0	-	/	/	/
2	scNPC16	NPC33-10X	3' v2	6059	37	13974419	399240	13575179	2306.39	55	+	3.93576	125.238	448.209
2	scNPC17	NPC36-10X	3' v2	3492	173	12477301	2263668	10213633	3573.11	1194	+	95.6938	470.034	565.259
2	scNPC18	NPC46-10X	3' v2	5291	1134	17730869	4888714	12842155	3351.14	24958	+	1407.6	4836.65	5523.18
2	scNPC19	NPC47-10X	3' v2	5243	1310	27962379	24500418	3461961	5333.28	3417	+	122.2	137.794	292.669
2	scNPC20	NPC49-10X	3' v2	3166	0	9906072	1857386	8048686	3128.89	0	+	/	/	/
2	scNPC21	NPC50-10X	3' v2	816	47	945264	183991	761273	1158.41	117	+	123.775	429.369	429.369
2	scNPC22	NPC51-10X	3' v2	4532	0	13319201	1038843	12280358	2938.92	0	+	/	/	/
2	scNT2	N52-10X	3' v2	13046	0	43635845			3344.77	0	-	/	/	/
2	scNT3	N53-10X	3' v2	6345	0	20352306			3207.61	0	-	/	/	/
2	scNT4	N54-10X	3' v2	7775	0	24409874			3139.53	0	-	/	/	/
2	scNT5	N55-10X	3' v2	23428	1 (B-cell)	72143817			3079.38	2	-	0.0277224	/	0
2	scNT6	N57-10X	3' v2	10723	0	29451271			2746.55	0	-	/	/	/
2	scNPC23	NPC58-10X	3' v2	13381	3307	83915149	53858914	30056235	6271.22	6989	+	83.2865	115.413	170.355
2	scNPC24	NPC59-10X	3' v2	9422	23	35024672	2549234	32475438	3717.33	80	+	2.2841	23.1442	170.318
2	scNPC25	NPC60-10X	3' v2	9110	63	26736620	2258216	24478404	2934.86	200	+	7.48038	73.5094	197.539
2	scNT7	N61-10X	3' v2	3955	0	16092261			4068.84	0	-	/	/	/
2	scNPC26	NPC62-10X	3' v2	13595	744	46228862	5143926	41084936	3400.43	2168	+	46.8971	195.182	233.82
2	scNPC27	NPC63-10X	3' v2	10467	0	29626520	376302	29250218	2830.47	0	+	/	/	/
2	scNPC28	NPC64-10X	3' v2	9512	159	56072397	5040949	51031448	5894.91	632	+	11.2711	45.6263	69.3262
2	scNPC29	NPC65-10X	3' v2	12538	24	50672323	3861399	46810924	4041.5	39	+	0.769651	0.77692	378.167
2	scNPC30	NPC66-10X	3' v2	7422	122	31689502	1846264	29843238	4269.67	500	+	15.7781	217.195	378.608
2	scNT8	N68-10X	3' v2	7264	0	26169252			3602.6	0	-	/	/	/
2	scNPC31	NPC69-10X	3' v2	11606	9	42442672	159533	42283139	3656.96	11	+	0.259173	37.6098	148.353
3	scNPC32	P1802_PriTis	5' v1	12611	667	109285629	83350469	192636098	8665.9	3799	+	34.7621	45.58	/
3	scNPC33	P1805_PriTis	5' v1	8285	106	49547082	45773527	95320609	5980.34	3749	+	75.6654	81.9	/
3	scNPC34	P1806_PriTis	5' v1	12185	18	36262266	35831796	72094062	2975.98	72	+	1.98554	2.01	/
3	scNPC35	P1807_PriTis	5' v1	10497	70	49190525	47353459	96543984	4686.15	2654	+	53.9535	56.05	/
3	scNPC36	P1808_PriTis	5' v1	11927	11	63225573	60128370	123353943	5301.05	56	+	0.885718	0.93	/
3	scNPC37	P1810_PriTis	5' v1	6588	158	24444613	21400440	45845053	3710.48	766	+	31.3361	35.79	/
3	scNPC38	P1811_PriTis	5' v1	5164	25	23481636	22865572	46347208	4547.18	57	+	2.42743	2.49	/
3	scNPC39	P1813_PriTis	5' v1	7082	827	46666946	33561763	80228709	6589.52	10939	+	234.406	325.94	/
3	scNPC40	P1815_PriTis	5' v1	9098	119	60475774	45977029	106452803	6647.15	157	+	2.59608	3.41	/
3	scNPC41	P1816_PriTis	5' v1	8787	1067	79884906	42744964	122629870	9091.26	4487	+	56.1683	104.97	/
4	scNPC42	Patient01	5' v1	2610	0	12684571	2539272	10145299	4860	0	-	/	/	/
4	scNPC43	Patient02	5' v1	4329	42	28175688	2344199	25831489	6509	65	+	/	27.728	/
4	scNPC44	Patient03	5' v1	6324	17	15696405	623192	15073213	2482	80	+	/	128.371	/
4	scNPC45	Patient04	5' v1	5373	3	26408088	604211	25803877	4915	0	+	/	0	/
4	scNPC46	Patient05	5' v1	4189	57	21753556	1948435	19805121	5193	267	-	/	137.033	/
4	scNPC47	Patient06	5' v1	5843	0	13629946	808856	12821090	2333	0	+	/	/	/
4	scNPC48	Patient07	5' v1	4613	5	9303419	411603	8891816	2017	5	-	/	12.1476	/
4	scNPC49	Patient08	5' v1	1924	7	3570531	66654	3503877	1856	36	/	/	540.103	/
4	scNPC50	Patient09	5' v1	8787	11	64810439	3217642	61592797	7376	48	+	/	14.9178	/
4	scNPC51	Patient10	5' v1	6629	0	31770357	0	31770357	4793	0	+	/	/	/
4	scNT9_1	Patient11_rep1	5' v1	5788	0	29615550	1204405	28411145	5117	0	/	/	/	/
4	scNT9_2	Patient11_rep2	5' v1	5818	0	30408600	1368412	29040188	5227	0	/	/	/	/
4	scNT10	Patient12	5' v1	7468	0	54112415	1698260	52414155	7246	0	/	/	/	/
4	scNT11	Patient13	5' v1	5183	1 (B-cell)	35487637	676684	34810953	6847	0	/	/	/	/
4	scNPC52	Patient14	5' v1	4018	2	19364420	0	19364420	4819	0	-	/	0	/
