# Supplementary material for: Landscape of Epstein-Barr virus gene expression and perturbations in cancer
Source: Research Square preprint supplement (doi:10.21203/rs.3.rs-3911441/v1), 2024-02-02
Supplement: Supplementary file 6 [file cddb5b6f9ed1c1751ecabf68.xlsx]

## Sheet: TableS10
Purpose	OligoID	Notes	Sequence (5'-3')
RPMS1-FISH	ISH_RPMS1probe1	exon VII	gcctgtcctcccagggacccgagacgaaggcccgtctgtagaggaagtggttgcgcatgcgggccagctccc
	ISH_RPMS1probe2	exon VII	gacgcgcaggcacagggtctcggtcagggtctcgctctgttgcgccaggcaggactgcagcttggccagaccctcggtggccacctggcgcaggtactgctccttgcg
	ISH_RPMS1probe3	exon VII	acctccgggctctcccgggacgcctcctcctcgcctcggcccaaccgctgcatggc tcggttgagccgcgtgtacagctcgttcctcttttgcaggatggcccggt
	ISH_RPMS1probe4	exon VII	cagtccgccttcagcgcctccaccgcgtcgcccgaggagctgtagaccccgccgcagaagagccgctcc
	ISH_RPMS1probe5	exon VII	ccaggcgacgctcccgggcaaacagggcagagagg
	ISH_RPMS1probe6	exon VII	gttgcaccgatagcatggccgccagagttccaatagagga
	ISH_RPMS1probe7	exon VII	cgagaagacgttgtaggtgtccagcgctctggtcgcccc
	ISH_RPMS1probe8	exon VII	cctggcggacttcattctcaaacagtcccgagaccggctccggattcaccggcaccgccaggtggttacaggagacgtgggtcccctctgccgtggaagggttgccgtggttgggcagaaccatcagctcgcccacacagcgccagcagggcacagaggtgatgtagaggcgcgggtctgggatgggacttacgccccgaaagcggcccagcagatccagggcccgttccaggctctccagccccatggtgtgagacatgca
CRISPR guide RNA	RS-29U	sgRNA against RPMS1 promoter position -29 sense	CACCGCATATTTAGGCCTGAGAAGC
	RS-29L	sgRNA against RPMS1 promoter position -29 antisense	aaacGCTTCTCAGGCCTAAATATGC
	RS_2_U	sgRNA against RPMS1 promoter position +38 sense	CACCGGGCAGCTCCTCTTCCGGGTA
	RS_2_L	sgRNA against RPMS1 promoter position +38 antisense	aaacTACCCGGAAGAGGAGCTGCCC
CRISPR repair template	mcherry-BI-pRPMS1 HDR template	5'-arm forward primer	tgcgtgttagtacctgtccattcaca
		5'-arm reverse primer	caggtggcacagcagggagttttaaaactgacagt
		promoter forward primer	actccctgctgtgccacctgacgtcggc
		promoter reverse primer	cctcttccggtttacgagggtaggaagtggtacg
		3'-arm forward primer	ccctcgtaaaccggaagaggagctgccg
		3'-arm reverse primer	agcacctaggtggaggccc
longread sequencing	RPMS1-Rev2-Short	reverse primer for BamHI A/I rightward transcripts	TTGCATGTCTCACACCATGG
	RPMS1rev2_BC3	reverse primer used in BARE2	ACTGGAGTCTTGTGTCCCAGTTACCAGGTTGCATGTCTCACACCATGG
	RPMS1rev2_BC5	reverse primer used in BARE3	ACTGCTTGTCCAGGGTTTGTGTAACCTTTTGCATGTCTCACACCATGG
	R2B5_sense	forward primer for BARE1	AGAGGCACTGGAGGATGTTG
	BART2_2	forward primer for BARE2	GAGGCATCTGGGTGCTCTTG
	BART3_F4_intron5	forward primer for BARE3	TTGGTGATGGACTGACCCAC
RNA quantification RT-qPCR	RPMS1-exon6to7-F		GATGTTTTGCGCCTGGAAGTTG
	RPMS1-exon6to7-R		TCTCCTCGGACATCCAGTGTC
	BZLF-qPCR-F		GAAACCACAACAGCCAGAATCG
	BZLF-qPCR-R		GATGATTTGGCAGCAGCCAC
	ACTB_F		TGGACTTCGAGCAAGAGATG
	ACTB_R		GAAGGAAGGCTGGAAGAGTG
	GAPDH_F		TCTCTGCTCCTCCTGTTCGA
	GAPDH_R		GCCCAATACGACCAAATCC
	MXA_F		ATGAGCTAATCACCCTGGAG
	MXA_R		ATACCCAATGTCAGCAGGC
	ISG15_F		CGC AGA TCA CCC AGA AGA TC
	ISG15_R		TTG TCC ACC ACC AGC AGG AC
	IRF7_F		TGTGCTGGCGAGAAGGC
	IRF7_R		TGGAGTCCAGCATGTGTGTG
	IFIT5_F		TGCAGAGCGCTGCCATCATG
	IFIT5_R		TTGCCCAATTGTATCTTCTACC
	IFIT2_F		AAGCACCTCAAAGGGCAAAAC
	IFIT2_R		TCGGCCCATGTGATAGTAGAC
	IFI27_F		TAG CAG CCA AGA TGA TGT CCG C
	IFI27_R		TCA ATC CGG AGA GTC CAG TTG C
	IFITM3_F		TGC CTG GGC TTC ATA GCA TTC G
	IFITM3_R		GCA GAA TGG TCA TGA GGA TGC C
	CCL20_F		GATGTCAGTGCTGCTACTCC
	CCL20_R		TCACAGCCTTCATTGGCCAG
	NFKBIA_F		GTGATCACCAACCAGCCAGA
	NFKBIA_R		GATTTTGCAGGTCCACTGCG
