# Supplementary material for: Landscape of Epstein-Barr virus gene expression and perturbations in cancer
Source: Research Square preprint supplement (doi:10.21203/rs.3.rs-3911441/v1), 2024-02-02
Supplement: Supplementary file 7 [file d36be745753fa9174311a2d1.xlsx]

## Sheet: 757DEGs
	EBVPos_Up	EBVPos_Down	EBVNeg_Up	EBVNeg_Down	Up	Down	Fisher	Binom	BinomAdj	Genes		G2M	UVD	E2F	MitoticSpindle		OXPH	IFNG	IFNA	TP53
MARK1	35	1	2	0	37	1	1	4.19342e-05	0.000105537	MARK1		TENT4A	TENT4A	POLA2	NF1		LDHB	CASP1	CASP1	LDHB
NAA15	35	1	2	0	37	1	1	4.19342e-05	0.000105537	NAA15		ATRX	ATRX	EZH2	DOCK4		NDUFAB1	B2M	B2M	CASP1
SIPA1L3	35	1	2	0	37	1	1	4.19342e-05	0.000105537	SIPA1L3		POLA2	PTEN	PRIM2	LRPPRC		ECHS1	CD74	CD74	VAMP8
TULP4	36	0	1	1	37	1	0.0526316	8.96304e-06	2.44674e-05	TULP4		EZH2	PEX14	ORC2	CLASP1		ETFB	PSMB9	PSMB9	RACK1
AFTPH	35	1	1	1	36	2	0.103841	4.19342e-05	0.000105537	AFTPH		PRIM2	ATP2C1	CSE1L	CEP192		COX8A	PSME1	PSME1	RPL18
ANAPC5	34	2	2	0	36	2	1	0.000170155	0.000397462	ANAPC5		UCK2	ABCC1	MMS22L	SOS1		UQCRQ	UBE2L6	UBE2L6	CTSD
ASH1L	35	1	1	1	36	2	0.103841	4.19342e-05	0.000105537	ASH1L		HNRNPU	DYRK1A	ATAD2	SSH2		SDHD	IFITM3	IFITM3	STOM
ATP2C1	35	1	1	1	36	2	0.103841	4.19342e-05	0.000105537	ATP2C1		SRSF10	SCAF8	HELLS			TCIRG1	LY6E	LY6E	S100A10
CCDC91	34	2	2	0	36	2	1	0.000170155	0.000397462	CCDC91		SS18	ATRN	PRKDC			ATP5MG	BST2	BST2	AK1
CDK13	35	1	1	1	36	2	0.103841	4.19342e-05	0.000105537	CDK13		CUL3	CDK13	CNOT9			COX4I1	PSMB8	PSMB8	DCXR
CRADD	34	2	2	0	36	2	1	0.000170155	0.000397462	CRADD		PRPF4B		NUP153			COX7A2	IFITM2	IFITM2	S100A4
DCAKD	35	1	1	1	36	2	0.103841	4.19342e-05	0.000105537	DCAKD		CCNT1					COX7C	VAMP8	IFITM1	H1-2
DHX9	35	1	1	1	36	2	0.103841	4.19342e-05	0.000105537	DHX9							TIMM8B	PSMB10	HLA-C	TAX1BP3
FAM135A	34	2	2	0	36	2	1	0.000170155	0.000397462	FAM135A							SLC25A5	HLA-A		HINT1
FBXO11	34	2	2	0	36	2	1	0.000170155	0.000397462	FBXO11							SLC25A6	HLA-DMA		RPS27L
FOXK2	34	2	2	0	36	2	1	0.000170155	0.000397462	FOXK2							NDUFA1	CASP4		RPS12
FRS2	34	2	2	0	36	2	1	0.000170155	0.000397462	FRS2							NDUFB1	MYD88
JPX	35	1	1	1	36	2	0.103841	4.19342e-05	0.000105537	JPX							NDUFB2	MT2A
NEDD1	34	2	2	0	36	2	1	0.000170155	0.000397462	NEDD1							NDUFB8	HLA-B
NHSL1	34	2	2	0	36	2	1	0.000170155	0.000397462	NHSL1							NDUFC2	HLA-DRB1
PCMTD1	34	2	2	0	36	2	1	0.000170155	0.000397462	PCMTD1							ATP5F1E
PUS7	34	2	2	0	36	2	1	0.000170155	0.000397462	PUS7							TOMM22
RP11-514P8.6	34	2	2	0	36	2	1	0.000170155	0.000397462	RP11-514P8.6							UQCRB
SFSWAP	34	2	2	0	36	2	1	0.000170155	0.000397462	SFSWAP
SLC25A36	35	1	1	1	36	2	0.103841	4.19342e-05	0.000105537	SLC25A36
SLC39A11	34	2	2	0	36	2	1	0.000170155	0.000397462	SLC39A11
SNX13	34	2	2	0	36	2	1	0.000170155	0.000397462	SNX13
SPPL3	34	2	2	0	36	2	1	0.000170155	0.000397462	SPPL3
TBC1D8	34	2	2	0	36	2	1	0.000170155	0.000397462	TBC1D8
TRERF1	34	2	2	0	36	2	1	0.000170155	0.000397462	TRERF1
UBE3C	34	2	2	0	36	2	1	0.000170155	0.000397462	UBE3C
ANKRD36B	33	3	2	0	35	3	1	0.000606107	0.00131541	ANKRD36B
ARID2	34	2	1	1	35	3	0.153627	0.000170155	0.000397462	ARID2
ARMC8	34	2	1	1	35	3	0.153627	0.000170155	0.000397462	ARMC8
ASAP1	34	2	1	1	35	3	0.153627	0.000170155	0.000397462	ASAP1
ATF7IP	33	3	2	0	35	3	1	0.000606107	0.00131541	ATF7IP
ATRN	34	2	1	1	35	3	0.153627	0.000170155	0.000397462	ATRN
BCAS3	33	3	2	0	35	3	1	0.000606107	0.00131541	BCAS3
BIRC6	34	2	1	1	35	3	0.153627	0.000170155	0.000397462	BIRC6
BRWD1	34	2	1	1	35	3	0.153627	0.000170155	0.000397462	BRWD1
C1QTNF3-AMACR	34	2	1	1	35	3	0.153627	0.000170155	0.000397462	C1QTNF3-AMACR
CEP162	33	3	2	0	35	3	1	0.000606107	0.00131541	CEP162
CEP83	34	2	1	1	35	3	0.153627	0.000170155	0.000397462	CEP83
CHD6	33	3	2	0	35	3	1	0.000606107	0.00131541	CHD6
CLASP1	34	2	1	1	35	3	0.153627	0.000170155	0.000397462	CLASP1
COA1	35	1	0	2	35	3	0.00426743	4.19342e-05	0.000105537	COA1
CPSF6	33	3	2	0	35	3	1	0.000606107	0.00131541	CPSF6
DENR	33	3	2	0	35	3	1	0.000606107	0.00131541	DENR
DIS3L2	33	3	2	0	35	3	1	0.000606107	0.00131541	DIS3L2
ELAVL1	33	3	2	0	35	3	1	0.000606107	0.00131541	ELAVL1
ETV6	34	2	1	1	35	3	0.153627	0.000170155	0.000397462	ETV6
EZH2	34	2	1	1	35	3	0.153627	0.000170155	0.000397462	EZH2
FGFR1OP	33	3	2	0	35	3	1	0.000606107	0.00131541	FGFR1OP
GALNT11	33	3	2	0	35	3	1	0.000606107	0.00131541	GALNT11
GPATCH8	33	3	2	0	35	3	1	0.000606107	0.00131541	GPATCH8
KB-1507C5.2	33	3	2	0	35	3	1	0.000606107	0.00131541	KB-1507C5.2
KDM2B	34	2	1	1	35	3	0.153627	0.000170155	0.000397462	KDM2B
L3MBTL4	33	3	2	0	35	3	1	0.000606107	0.00131541	L3MBTL4
LRPPRC	34	2	1	1	35	3	0.153627	0.000170155	0.000397462	LRPPRC
2023-03-05	33	3	2	0	35	3	1	0.000606107	0.00131541	2023-03-05
MDM4	33	3	2	0	35	3	1	0.000606107	0.00131541	MDM4
NF1	34	2	1	1	35	3	0.153627	0.000170155	0.000397462	NF1
NPL	34	2	1	1	35	3	0.153627	0.000170155	0.000397462	NPL
NSMCE2	34	2	1	1	35	3	0.153627	0.000170155	0.000397462	NSMCE2
NUPL2	33	3	2	0	35	3	1	0.000606107	0.00131541	NUPL2
ORC2	33	3	2	0	35	3	1	0.000606107	0.00131541	ORC2
PDS5A	34	2	1	1	35	3	0.153627	0.000170155	0.000397462	PDS5A
PDSS2	34	2	1	1	35	3	0.153627	0.000170155	0.000397462	PDSS2
PHC3	33	3	2	0	35	3	1	0.000606107	0.00131541	PHC3
PHF21A	33	3	2	0	35	3	1	0.000606107	0.00131541	PHF21A
POGZ	33	3	2	0	35	3	1	0.000606107	0.00131541	POGZ
PRRC2C	33	3	2	0	35	3	1	0.000606107	0.00131541	PRRC2C
PTK2	34	2	1	1	35	3	0.153627	0.000170155	0.000397462	PTK2
RALGPS1	34	2	1	1	35	3	0.153627	0.000170155	0.000397462	RALGPS1
RAP1B	33	3	2	0	35	3	1	0.000606107	0.00131541	RAP1B
RNF145	33	3	2	0	35	3	1	0.000606107	0.00131541	RNF145
SENP6	33	3	2	0	35	3	1	0.000606107	0.00131541	SENP6
SMARCAD1	33	3	2	0	35	3	1	0.000606107	0.00131541	SMARCAD1
TIMM23B	33	3	2	0	35	3	1	0.000606107	0.00131541	TIMM23B
TMCC1	33	3	2	0	35	3	1	0.000606107	0.00131541	TMCC1
TRIP12	34	2	1	1	35	3	0.153627	0.000170155	0.000397462	TRIP12
UBE2G1	33	3	2	0	35	3	1	0.000606107	0.00131541	UBE2G1
UPF2	33	3	2	0	35	3	1	0.000606107	0.00131541	UPF2
USP24	33	3	2	0	35	3	1	0.000606107	0.00131541	USP24
USP45	34	2	1	1	35	3	0.153627	0.000170155	0.000397462	USP45
USP53	33	3	2	0	35	3	1	0.000606107	0.00131541	USP53
UVRAG	33	3	2	0	35	3	1	0.000606107	0.00131541	UVRAG
WDR47	33	3	2	0	35	3	1	0.000606107	0.00131541	WDR47
XG	33	3	2	0	35	3	1	0.000606107	0.00131541	XG
ZFAND3	34	2	1	1	35	3	0.153627	0.000170155	0.000397462	ZFAND3
ZNF292	33	3	2	0	35	3	1	0.000606107	0.00131541	ZNF292
AATF	33	3	1	1	34	4	0.201991	0.000606107	0.00131541	AATF
ABHD3	32	4	2	0	34	4	1	0.00191396	0.00385689	ABHD3
AC097721.2	33	3	1	0	34	3	1	0.000606107	0.00131541	AC097721.2
ACACA	33	3	1	1	34	4	0.201991	0.000606107	0.00131541	ACACA
ACAP2	33	3	1	1	34	4	0.201991	0.000606107	0.00131541	ACAP2
ADNP	33	3	1	1	34	4	0.201991	0.000606107	0.00131541	ADNP
ADRBK2	33	3	1	1	34	4	0.201991	0.000606107	0.00131541	ADRBK2
AEBP2	32	4	2	0	34	4	1	0.00191396	0.00385689	AEBP2
AGFG1	32	4	2	0	34	4	1	0.00191396	0.00385689	AGFG1
ARID1B	33	3	1	1	34	4	0.201991	0.000606107	0.00131541	ARID1B
ARID4B	32	4	2	0	34	4	1	0.00191396	0.00385689	ARID4B
ASCC3	33	3	1	1	34	4	0.201991	0.000606107	0.00131541	ASCC3
ATF7IP2	33	3	1	1	34	4	0.201991	0.000606107	0.00131541	ATF7IP2
ATP11B	33	3	1	1	34	4	0.201991	0.000606107	0.00131541	ATP11B
ATR	32	4	2	0	34	4	1	0.00191396	0.00385689	ATR
BOD1L1	33	3	1	1	34	4	0.201991	0.000606107	0.00131541	BOD1L1
BRAF	32	4	2	0	34	4	1	0.00191396	0.00385689	BRAF
BTAF1	32	4	2	0	34	4	1	0.00191396	0.00385689	BTAF1
C11orf30	32	4	2	0	34	4	1	0.00191396	0.00385689	C11orf30
C11orf49	33	3	1	1	34	4	0.201991	0.000606107	0.00131541	C11orf49
CACUL1	32	4	2	0	34	4	1	0.00191396	0.00385689	CACUL1
CCDC132	32	4	2	0	34	4	1	0.00191396	0.00385689	CCDC132
CCNT1	34	2	0	2	34	4	0.00853485	0.000170155	0.000397462	CCNT1
CDKAL1	32	4	2	0	34	4	1	0.00191396	0.00385689	CDKAL1
CEP290	32	4	2	0	34	4	1	0.00191396	0.00385689	CEP290
CEPT1	32	4	2	0	34	4	1	0.00191396	0.00385689	CEPT1
CFLAR	32	4	2	0	34	4	1	0.00191396	0.00385689	CFLAR
CHD4	33	3	1	1	34	4	0.201991	0.000606107	0.00131541	CHD4
CSE1L	34	2	0	2	34	4	0.00853485	0.000170155	0.000397462	CSE1L
CUL3	33	3	1	1	34	4	0.201991	0.000606107	0.00131541	CUL3
DAP3	33	3	1	1	34	4	0.201991	0.000606107	0.00131541	DAP3
DDX3X	32	4	2	0	34	4	1	0.00191396	0.00385689	DDX3X
DENND1A	32	4	2	0	34	4	1	0.00191396	0.00385689	DENND1A
DHRSX	32	4	2	0	34	4	1	0.00191396	0.00385689	DHRSX
DIP2A	32	4	2	0	34	4	1	0.00191396	0.00385689	DIP2A
DLEU1	33	3	1	1	34	4	0.201991	0.000606107	0.00131541	DLEU1
DNAJA3	34	2	0	2	34	4	0.00853485	0.000170155	0.000397462	DNAJA3
DYM	32	4	2	0	34	4	1	0.00191396	0.00385689	DYM
EXOC1	33	3	1	1	34	4	0.201991	0.000606107	0.00131541	EXOC1
EXOC4	32	4	2	0	34	4	1	0.00191396	0.00385689	EXOC4
FARP2	33	3	1	1	34	4	0.201991	0.000606107	0.00131541	FARP2
FARS2	33	3	1	1	34	4	0.201991	0.000606107	0.00131541	FARS2
FBRSL1	32	4	2	0	34	4	1	0.00191396	0.00385689	FBRSL1
FBXL4	33	3	1	1	34	4	0.201991	0.000606107	0.00131541	FBXL4
FNBP4	33	3	1	1	34	4	0.201991	0.000606107	0.00131541	FNBP4
GGNBP2	32	4	2	0	34	4	1	0.00191396	0.00385689	GGNBP2
GSAP	33	3	1	1	34	4	0.201991	0.000606107	0.00131541	GSAP
GTF2H3	33	3	1	1	34	4	0.201991	0.000606107	0.00131541	GTF2H3
HECTD4	32	4	2	0	34	4	1	0.00191396	0.00385689	HECTD4
JAK2	33	3	1	1	34	4	0.201991	0.000606107	0.00131541	JAK2
KDM6A	32	4	2	0	34	4	1	0.00191396	0.00385689	KDM6A
KIAA1468	33	3	1	1	34	4	0.201991	0.000606107	0.00131541	KIAA1468
KLHL5	32	4	2	0	34	4	1	0.00191396	0.00385689	KLHL5
KMT2C	33	3	1	1	34	4	0.201991	0.000606107	0.00131541	KMT2C
KRR1	32	4	2	0	34	4	1	0.00191396	0.00385689	KRR1
LIMS1	32	4	2	0	34	4	1	0.00191396	0.00385689	LIMS1
LMBRD1	32	4	2	0	34	4	1	0.00191396	0.00385689	LMBRD1
LRBA	32	4	2	0	34	4	1	0.00191396	0.00385689	LRBA
MAPKAPK2	33	3	1	1	34	4	0.201991	0.000606107	0.00131541	MAPKAPK2
2023-03-07	32	4	2	0	34	4	1	0.00191396	0.00385689	2023-03-07
MAU2	32	4	2	0	34	4	1	0.00191396	0.00385689	MAU2
MBD5	32	4	2	0	34	4	1	0.00191396	0.00385689	MBD5
MBTD1	32	4	2	0	34	4	1	0.00191396	0.00385689	MBTD1
MCPH1	32	4	2	0	34	4	1	0.00191396	0.00385689	MCPH1
MDM2	33	3	1	1	34	4	0.201991	0.000606107	0.00131541	MDM2
MFF	32	4	2	0	34	4	1	0.00191396	0.00385689	MFF
MYO6	32	4	2	0	34	4	1	0.00191396	0.00385689	MYO6
NDUFAF6	32	4	2	0	34	4	1	0.00191396	0.00385689	NDUFAF6
NEK1	33	3	1	1	34	4	0.201991	0.000606107	0.00131541	NEK1
NFYA	32	4	2	0	34	4	1	0.00191396	0.00385689	NFYA
NOL10	33	3	1	1	34	4	0.201991	0.000606107	0.00131541	NOL10
NOP2	33	3	1	1	34	4	0.201991	0.000606107	0.00131541	NOP2
NPLOC4	32	4	2	0	34	4	1	0.00191396	0.00385689	NPLOC4
NUP160	32	4	2	0	34	4	1	0.00191396	0.00385689	NUP160
NVL	32	4	2	0	34	4	1	0.00191396	0.00385689	NVL
OLA1	33	3	1	1	34	4	0.201991	0.000606107	0.00131541	OLA1
PAK4	32	3	2	0	34	3	1	0.00191396	0.00385689	PAK4
PAPD7	32	4	2	0	34	4	1	0.00191396	0.00385689	PAPD7
PEX14	32	4	2	0	34	4	1	0.00191396	0.00385689	PEX14
PHC2	33	2	1	1	34	3	0.157658	0.000606107	0.00131541	PHC2
PHIP	32	4	2	0	34	4	1	0.00191396	0.00385689	PHIP
PIK3CB	32	4	2	0	34	4	1	0.00191396	0.00385689	PIK3CB
PIKFYVE	33	3	1	1	34	4	0.201991	0.000606107	0.00131541	PIKFYVE
PKP4	33	3	1	1	34	4	0.201991	0.000606107	0.00131541	PKP4
POLA2	34	2	0	2	34	4	0.00853485	0.000170155	0.000397462	POLA2
PRIM2	33	3	1	1	34	4	0.201991	0.000606107	0.00131541	PRIM2
PSME4	33	3	1	1	34	4	0.201991	0.000606107	0.00131541	PSME4
RAD9A	32	4	2	0	34	4	1	0.00191396	0.00385689	RAD9A
RELB	33	3	1	1	34	4	0.201991	0.000606107	0.00131541	RELB
RGS12	32	4	2	0	34	4	1	0.00191396	0.00385689	RGS12
RNF150	32	2	2	0	34	2	1	0.00191396	0.00385689	RNF150
RNF19A	32	4	2	0	34	4	1	0.00191396	0.00385689	RNF19A
RNF216	32	4	2	0	34	4	1	0.00191396	0.00385689	RNF216
RNGTT	33	3	1	1	34	4	0.201991	0.000606107	0.00131541	RNGTT
ROBO1	33	3	1	1	34	4	0.201991	0.000606107	0.00131541	ROBO1
RP11-624C23.1	32	4	2	0	34	4	1	0.00191396	0.00385689	RP11-624C23.1
RP11-624L4.1	34	2	0	2	34	4	0.00853485	0.000170155	0.000397462	RP11-624L4.1
RUVBL1	32	4	2	0	34	4	1	0.00191396	0.00385689	RUVBL1
SESN1	32	4	2	0	34	4	1	0.00191396	0.00385689	SESN1
SIK2	32	4	2	0	34	4	1	0.00191396	0.00385689	SIK2
SLC30A6	32	4	2	0	34	4	1	0.00191396	0.00385689	SLC30A6
SLX4IP	33	3	1	1	34	4	0.201991	0.000606107	0.00131541	SLX4IP
SMURF1	32	4	2	0	34	4	1	0.00191396	0.00385689	SMURF1
SNRNP70	32	4	2	0	34	4	1	0.00191396	0.00385689	SNRNP70
SOS1	33	3	1	1	34	4	0.201991	0.000606107	0.00131541	SOS1
SPIDR	32	4	2	0	34	4	1	0.00191396	0.00385689	SPIDR
SPOPL	33	3	1	1	34	4	0.201991	0.000606107	0.00131541	SPOPL
SRGAP1	32	4	2	0	34	4	1	0.00191396	0.00385689	SRGAP1
SS18	32	4	2	0	34	4	1	0.00191396	0.00385689	SS18
SSH2	33	3	1	1	34	4	0.201991	0.000606107	0.00131541	SSH2
STAG2	33	3	1	1	34	4	0.201991	0.000606107	0.00131541	STAG2
STXBP4	33	3	1	1	34	4	0.201991	0.000606107	0.00131541	STXBP4
TASP1	32	4	2	0	34	4	1	0.00191396	0.00385689	TASP1
TCF20	32	4	2	0	34	4	1	0.00191396	0.00385689	TCF20
TDG	32	4	2	0	34	4	1	0.00191396	0.00385689	TDG
THADA	32	4	2	0	34	4	1	0.00191396	0.00385689	THADA
TM7SF3	33	3	1	1	34	4	0.201991	0.000606107	0.00131541	TM7SF3
TMEM41B	32	4	2	0	34	4	1	0.00191396	0.00385689	TMEM41B
TMEM67	32	4	2	0	34	4	1	0.00191396	0.00385689	TMEM67
TMTC3	32	4	2	0	34	4	1	0.00191396	0.00385689	TMTC3
TPST1	33	3	1	1	34	4	0.201991	0.000606107	0.00131541	TPST1
TRA2A	32	4	2	0	34	4	1	0.00191396	0.00385689	TRA2A
TRPM7	32	4	2	0	34	4	1	0.00191396	0.00385689	TRPM7
TYK2	32	4	2	0	34	4	1	0.00191396	0.00385689	TYK2
UBE3A	32	4	2	0	34	4	1	0.00191396	0.00385689	UBE3A
UBE4B	32	4	2	0	34	4	1	0.00191396	0.00385689	UBE4B
USP34	32	4	2	0	34	4	1	0.00191396	0.00385689	USP34
VPS13B	32	4	2	0	34	4	1	0.00191396	0.00385689	VPS13B
WDR11	32	4	2	0	34	4	1	0.00191396	0.00385689	WDR11
XPO7	33	3	1	1	34	4	0.201991	0.000606107	0.00131541	XPO7
ZNF623	32	3	2	0	34	3	1	0.00191396	0.00385689	ZNF623
ABCC1	32	4	1	1	33	5	0.248933	0.00191396	0.00385689	ABCC1
ABCC5	32	4	1	1	33	5	0.248933	0.00191396	0.00385689	ABCC5
ACTR3C	32	3	1	1	33	4	0.207207	0.00191396	0.00385689	ACTR3C
ADAM23	32	4	1	1	33	5	0.248933	0.00191396	0.00385689	ADAM23
ADIPOR2	32	4	1	1	33	5	0.248933	0.00191396	0.00385689	ADIPOR2
ADK	32	4	1	1	33	5	0.248933	0.00191396	0.00385689	ADK
AGTPBP1	32	4	1	1	33	5	0.248933	0.00191396	0.00385689	AGTPBP1
ANKRD17	32	4	1	1	33	5	0.248933	0.00191396	0.00385689	ANKRD17
ANKRD23	32	4	1	1	33	5	0.248933	0.00191396	0.00385689	ANKRD23
ANKRD33B	32	3	1	1	33	4	0.207207	0.00191396	0.00385689	ANKRD33B
ANKRD36	33	3	0	2	33	5	0.0142248	0.000606107	0.00131541	ANKRD36
ARFGEF2	32	4	1	1	33	5	0.248933	0.00191396	0.00385689	ARFGEF2
ASNS	32	2	1	1	33	3	0.161905	0.00191396	0.00385689	ASNS
ASTN2	32	4	1	1	33	5	0.248933	0.00191396	0.00385689	ASTN2
ATP11C	33	3	0	2	33	5	0.0142248	0.000606107	0.00131541	ATP11C
ATRX	32	4	1	1	33	5	0.248933	0.00191396	0.00385689	ATRX
AZIN1	32	4	1	1	33	5	0.248933	0.00191396	0.00385689	AZIN1
BCL11A	32	4	1	1	33	5	0.248933	0.00191396	0.00385689	BCL11A
BCL2	33	3	0	2	33	5	0.0142248	0.000606107	0.00131541	BCL2
C1orf159	32	4	1	1	33	5	0.248933	0.00191396	0.00385689	C1orf159
C2CD2	32	4	1	1	33	5	0.248933	0.00191396	0.00385689	C2CD2
C5orf28	32	4	1	1	33	5	0.248933	0.00191396	0.00385689	C5orf28
CACNA2D1	32	4	1	1	33	5	0.248933	0.00191396	0.00385689	CACNA2D1
CANT1	32	4	1	1	33	5	0.248933	0.00191396	0.00385689	CANT1
CBFA2T2	32	4	1	1	33	5	0.248933	0.00191396	0.00385689	CBFA2T2
CCDC138	32	4	1	1	33	5	0.248933	0.00191396	0.00385689	CCDC138
CCDC14	33	3	0	2	33	5	0.0142248	0.000606107	0.00131541	CCDC14
CEP192	32	4	1	1	33	5	0.248933	0.00191396	0.00385689	CEP192
chr22-38-28785274-29006793.1	32	4	1	1	33	5	0.248933	0.00191396	0.00385689	chr22-38-28785274-29006793.1
CHST15	32	4	1	1	33	5	0.248933	0.00191396	0.00385689	CHST15
CNOT2	32	4	1	1	33	5	0.248933	0.00191396	0.00385689	CNOT2
COG7	32	4	1	1	33	5	0.248933	0.00191396	0.00385689	COG7
CUL2	32	4	1	1	33	5	0.248933	0.00191396	0.00385689	CUL2
CYTH1	32	4	1	1	33	5	0.248933	0.00191396	0.00385689	CYTH1
DCUN1D1	32	4	1	1	33	5	0.248933	0.00191396	0.00385689	DCUN1D1
DHX34	32	4	1	1	33	5	0.248933	0.00191396	0.00385689	DHX34
DNM1L	32	4	1	1	33	5	0.248933	0.00191396	0.00385689	DNM1L
DNMT3A	33	3	0	2	33	5	0.0142248	0.000606107	0.00131541	DNMT3A
DOCK1	32	4	1	1	33	5	0.248933	0.00191396	0.00385689	DOCK1
DOCK4	33	3	0	2	33	5	0.0142248	0.000606107	0.00131541	DOCK4
DYRK1A	32	4	1	1	33	5	0.248933	0.00191396	0.00385689	DYRK1A
EFCAB2	32	4	1	1	33	5	0.248933	0.00191396	0.00385689	EFCAB2
EPS15	32	4	1	1	33	5	0.248933	0.00191396	0.00385689	EPS15
EPT1	32	4	1	1	33	5	0.248933	0.00191396	0.00385689	EPT1
ESRP1	32	4	1	1	33	5	0.248933	0.00191396	0.00385689	ESRP1
EXOC7	32	4	1	1	33	5	0.248933	0.00191396	0.00385689	EXOC7
FAM117B	33	3	0	2	33	5	0.0142248	0.000606107	0.00131541	FAM117B
FAM171A1	33	3	0	2	33	5	0.0142248	0.000606107	0.00131541	FAM171A1
FAM193A	32	4	1	1	33	5	0.248933	0.00191396	0.00385689	FAM193A
FAM222B	32	4	1	1	33	5	0.248933	0.00191396	0.00385689	FAM222B
FAR1	32	4	1	1	33	5	0.248933	0.00191396	0.00385689	FAR1
FBXL20	32	4	1	1	33	5	0.248933	0.00191396	0.00385689	FBXL20
FBXW8	32	4	1	1	33	5	0.248933	0.00191396	0.00385689	FBXW8
FRK	32	4	1	1	33	5	0.248933	0.00191396	0.00385689	FRK
FZD6	32	4	1	1	33	5	0.248933	0.00191396	0.00385689	FZD6
GATAD2B	32	4	1	1	33	5	0.248933	0.00191396	0.00385689	GATAD2B
GCFC2	33	3	0	2	33	5	0.0142248	0.000606107	0.00131541	GCFC2
GON4L	32	4	1	1	33	5	0.248933	0.00191396	0.00385689	GON4L
GTF2F2	32	4	1	1	33	5	0.248933	0.00191396	0.00385689	GTF2F2
HEATR1	32	4	1	1	33	5	0.248933	0.00191396	0.00385689	HEATR1
HNRNPU-AS1	32	3	1	1	33	4	0.207207	0.00191396	0.00385689	HNRNPU-AS1
HTT	32	4	1	1	33	5	0.248933	0.00191396	0.00385689	HTT
IMMP2L	32	4	1	1	33	5	0.248933	0.00191396	0.00385689	IMMP2L
ITGAV	32	4	1	1	33	5	0.248933	0.00191396	0.00385689	ITGAV
KAT6A	32	4	1	1	33	5	0.248933	0.00191396	0.00385689	KAT6A
KIAA0195	32	4	1	1	33	5	0.248933	0.00191396	0.00385689	KIAA0195
KIAA0368	32	4	1	1	33	5	0.248933	0.00191396	0.00385689	KIAA0368
KIF13A	32	4	1	1	33	5	0.248933	0.00191396	0.00385689	KIF13A
KITLG	33	3	0	2	33	5	0.0142248	0.000606107	0.00131541	KITLG
LARP1B	33	3	0	2	33	5	0.0142248	0.000606107	0.00131541	LARP1B
LUC7L	32	4	1	1	33	5	0.248933	0.00191396	0.00385689	LUC7L
MAPKAP1	32	4	1	1	33	5	0.248933	0.00191396	0.00385689	MAPKAP1
MED13L	32	4	1	1	33	5	0.248933	0.00191396	0.00385689	MED13L
MMS22L	32	4	1	1	33	5	0.248933	0.00191396	0.00385689	MMS22L
MOB3A	32	4	1	1	33	5	0.248933	0.00191396	0.00385689	MOB3A
MTG2	32	3	1	1	33	4	0.207207	0.00191396	0.00385689	MTG2
MYO19	32	4	1	1	33	5	0.248933	0.00191396	0.00385689	MYO19
NBPF1	32	4	1	1	33	5	0.248933	0.00191396	0.00385689	NBPF1
NMT1	32	4	1	1	33	5	0.248933	0.00191396	0.00385689	NMT1
NNT	32	3	1	1	33	4	0.207207	0.00191396	0.00385689	NNT
NR2C1	32	4	1	1	33	5	0.248933	0.00191396	0.00385689	NR2C1
NUP133	32	4	1	1	33	5	0.248933	0.00191396	0.00385689	NUP133
NUP153	32	4	1	1	33	5	0.248933	0.00191396	0.00385689	NUP153
NUTM2A-AS1	32	4	1	1	33	5	0.248933	0.00191396	0.00385689	NUTM2A-AS1
OGDH	32	4	1	1	33	5	0.248933	0.00191396	0.00385689	OGDH
PARD3	32	4	1	1	33	5	0.248933	0.00191396	0.00385689	PARD3
PARN	32	4	1	1	33	5	0.248933	0.00191396	0.00385689	PARN
PAXBP1	32	4	1	1	33	5	0.248933	0.00191396	0.00385689	PAXBP1
POLA1	32	4	1	1	33	5	0.248933	0.00191396	0.00385689	POLA1
POLR2J3	32	4	1	1	33	5	0.248933	0.00191396	0.00385689	POLR2J3
PPM1B	32	4	1	1	33	5	0.248933	0.00191396	0.00385689	PPM1B
PPP6R3	32	4	1	1	33	5	0.248933	0.00191396	0.00385689	PPP6R3
PRKAR1B	33	3	0	2	33	5	0.0142248	0.000606107	0.00131541	PRKAR1B
PRKDC	33	3	0	2	33	5	0.0142248	0.000606107	0.00131541	PRKDC
PRMT3	32	4	1	1	33	5	0.248933	0.00191396	0.00385689	PRMT3
PRPF4B	32	4	1	1	33	5	0.248933	0.00191396	0.00385689	PRPF4B
PTEN	32	4	1	1	33	5	0.248933	0.00191396	0.00385689	PTEN
PUM2	32	4	1	1	33	5	0.248933	0.00191396	0.00385689	PUM2
RIC1	32	3	1	1	33	4	0.207207	0.00191396	0.00385689	RIC1
RIF1	33	3	0	2	33	5	0.0142248	0.000606107	0.00131541	RIF1
RNF34	32	4	1	1	33	5	0.248933	0.00191396	0.00385689	RNF34
RSRC1	32	4	1	1	33	5	0.248933	0.00191396	0.00385689	RSRC1
SAMD4B	32	4	1	1	33	5	0.248933	0.00191396	0.00385689	SAMD4B
SCAF8	32	4	1	1	33	5	0.248933	0.00191396	0.00385689	SCAF8
SENP1	32	4	1	1	33	5	0.248933	0.00191396	0.00385689	SENP1
SGPP2	32	4	1	1	33	5	0.248933	0.00191396	0.00385689	SGPP2
SMYD4	32	4	1	1	33	5	0.248933	0.00191396	0.00385689	SMYD4
SON	32	4	1	1	33	5	0.248933	0.00191396	0.00385689	SON
SP3	32	4	1	1	33	5	0.248933	0.00191396	0.00385689	SP3
SPATS2	33	3	0	2	33	5	0.0142248	0.000606107	0.00131541	SPATS2
SRSF10	32	4	1	1	33	5	0.248933	0.00191396	0.00385689	SRSF10
SYMPK	32	4	1	1	33	5	0.248933	0.00191396	0.00385689	SYMPK
TAF15	32	4	1	1	33	5	0.248933	0.00191396	0.00385689	TAF15
TAF3	32	4	1	1	33	5	0.248933	0.00191396	0.00385689	TAF3
TBC1D17	32	4	1	1	33	5	0.248933	0.00191396	0.00385689	TBC1D17
TBC1D19	32	4	1	1	33	5	0.248933	0.00191396	0.00385689	TBC1D19
TCF3	33	3	0	2	33	5	0.0142248	0.000606107	0.00131541	TCF3
THOC2	32	4	1	1	33	5	0.248933	0.00191396	0.00385689	THOC2
TRAPPC9	32	4	1	1	33	5	0.248933	0.00191396	0.00385689	TRAPPC9
TTC27	32	4	1	1	33	5	0.248933	0.00191396	0.00385689	TTC27
UCK2	32	4	1	1	33	5	0.248933	0.00191396	0.00385689	UCK2
UNK	32	4	1	1	33	5	0.248933	0.00191396	0.00385689	UNK
VEZT	32	4	1	1	33	5	0.248933	0.00191396	0.00385689	VEZT
VRK2	32	4	1	1	33	5	0.248933	0.00191396	0.00385689	VRK2
WARS2	33	3	0	2	33	5	0.0142248	0.000606107	0.00131541	WARS2
WBSCR22	32	4	1	1	33	5	0.248933	0.00191396	0.00385689	WBSCR22
WDR73	32	4	1	1	33	5	0.248933	0.00191396	0.00385689	WDR73
WNK2	32	4	1	1	33	5	0.248933	0.00191396	0.00385689	WNK2
WWP1	32	4	1	1	33	5	0.248933	0.00191396	0.00385689	WWP1
YEATS2	33	3	0	2	33	5	0.0142248	0.000606107	0.00131541	YEATS2
YY1AP1	32	4	1	1	33	5	0.248933	0.00191396	0.00385689	YY1AP1
ZCCHC11	32	4	1	1	33	5	0.248933	0.00191396	0.00385689	ZCCHC11
ZFP64	32	4	1	1	33	5	0.248933	0.00191396	0.00385689	ZFP64
ZHX2	32	4	1	1	33	5	0.248933	0.00191396	0.00385689	ZHX2
ZNF43	33	2	0	2	33	4	0.00900901	0.000606107	0.00131541	ZNF43
ZNF641	32	4	1	1	33	5	0.248933	0.00191396	0.00385689	ZNF641
ZNF721	32	4	1	1	33	5	0.248933	0.00191396	0.00385689	ZNF721
ATAD2	32	4	0	2	32	6	0.0213371	0.00191396	0.00385689	ATAD2
BZW2	32	4	0	2	32	6	0.0213371	0.00191396	0.00385689	BZW2
CTD-2541M15.1	32	3	0	2	32	5	0.015015	0.00191396	0.00385689	CTD-2541M15.1
DNAJC2	32	4	0	2	32	6	0.0213371	0.00191396	0.00385689	DNAJC2
DRAM1	32	4	0	2	32	6	0.0213371	0.00191396	0.00385689	DRAM1
EIF4G3	32	4	0	2	32	6	0.0213371	0.00191396	0.00385689	EIF4G3
FHOD3	32	3	0	2	32	5	0.015015	0.00191396	0.00385689	FHOD3
FUS	32	4	0	2	32	6	0.0213371	0.00191396	0.00385689	FUS
GGA2	32	4	0	2	32	6	0.0213371	0.00191396	0.00385689	GGA2
HELLS	32	4	0	2	32	6	0.0213371	0.00191396	0.00385689	HELLS
HGSNAT	32	4	0	2	32	6	0.0213371	0.00191396	0.00385689	HGSNAT
HPCAL1	32	4	0	2	32	6	0.0213371	0.00191396	0.00385689	HPCAL1
IGSF9	32	4	0	2	32	6	0.0213371	0.00191396	0.00385689	IGSF9
LINC01376	32	4	0	2	32	6	0.0213371	0.00191396	0.00385689	LINC01376
REV3L	32	4	0	2	32	6	0.0213371	0.00191396	0.00385689	REV3L
RQCD1	32	4	0	2	32	6	0.0213371	0.00191396	0.00385689	RQCD1
STAT6	32	4	0	2	32	6	0.0213371	0.00191396	0.00385689	STAT6
SUSD4	32	3	0	2	32	5	0.015015	0.00191396	0.00385689	SUSD4
UST	32	4	0	2	32	6	0.0213371	0.00191396	0.00385689	UST
ARMCX3	11	23	2	0	13	23	0.12381	0.00191396	0.00385689	ARMCX3
ATOX1	11	25	2	0	13	25	0.110953	0.00191396	0.00385689	ATOX1
C4orf3	11	25	2	0	13	25	0.110953	0.00191396	0.00385689	C4orf3
CLTA	11	25	2	0	13	25	0.110953	0.00191396	0.00385689	CLTA
DPM2	11	24	2	0	13	24	0.117117	0.00191396	0.00385689	DPM2
DPM3	11	24	2	0	13	24	0.117117	0.00191396	0.00385689	DPM3
DRAP1	11	25	2	0	13	25	0.110953	0.00191396	0.00385689	DRAP1
H3F3A	11	25	2	0	13	25	0.110953	0.00191396	0.00385689	H3F3A
HINT2	11	25	2	0	13	25	0.110953	0.00191396	0.00385689	HINT2
HIST1H1C	11	24	2	0	13	24	0.117117	0.00191396	0.00385689	HIST1H1C
MIR4435-1HG	11	24	2	0	13	24	0.117117	0.00191396	0.00385689	MIR4435-1HG
MYEOV2	11	25	2	0	13	25	0.110953	0.00191396	0.00385689	MYEOV2
PRELID1	11	25	2	0	13	25	0.110953	0.00191396	0.00385689	PRELID1
RP11-532F12.5	11	24	2	0	13	24	0.117117	0.00191396	0.00385689	RP11-532F12.5
SCAND1	11	25	2	0	13	25	0.110953	0.00191396	0.00385689	SCAND1
TMEM14B	11	25	2	0	13	25	0.110953	0.00191396	0.00385689	TMEM14B
UBE2L6	11	25	2	0	13	25	0.110953	0.00191396	0.00385689	UBE2L6
UQCR11.1	11	25	2	0	13	25	0.110953	0.00191396	0.00385689	UQCR11.1
ZNHIT1	11	25	2	0	13	25	0.110953	0.00191396	0.00385689	ZNHIT1
AK1	11	23	1	1	12	24	1	0.00191396	0.00385689	AK1
ARHGDIB	10	25	2	0	12	25	0.0990991	0.000606107	0.00131541	ARHGDIB
ARPC3	11	25	1	1	12	26	0.537696	0.00191396	0.00385689	ARPC3
CALM1	11	25	1	1	12	26	0.537696	0.00191396	0.00385689	CALM1
CD59	10	26	2	0	12	26	0.0938834	0.000606107	0.00131541	CD59
COX8A	10	26	2	0	12	26	0.0938834	0.000606107	0.00131541	COX8A
CTSA	11	24	1	1	12	25	1	0.00191396	0.00385689	CTSA
CYB561D2	11	23	1	1	12	24	1	0.00191396	0.00385689	CYB561D2
DAD1	10	26	2	0	12	26	0.0938834	0.000606107	0.00131541	DAD1
DGCR6L	10	26	2	0	12	26	0.0938834	0.000606107	0.00131541	DGCR6L
EBAG9	11	25	1	1	12	26	0.537696	0.00191396	0.00385689	EBAG9
EBPL	11	25	1	1	12	26	0.537696	0.00191396	0.00385689	EBPL
EDF1	11	25	1	1	12	26	0.537696	0.00191396	0.00385689	EDF1
EID1	11	25	1	1	12	26	0.537696	0.00191396	0.00385689	EID1
ETV7	11	24	1	1	12	25	1	0.00191396	0.00385689	ETV7
GABARAP	10	26	2	0	12	26	0.0938834	0.000606107	0.00131541	GABARAP
GMFG	11	23	1	1	12	24	1	0.00191396	0.00385689	GMFG
GTF3C6	11	25	1	1	12	26	0.537696	0.00191396	0.00385689	GTF3C6
HCFC1R1	11	25	1	1	12	26	0.537696	0.00191396	0.00385689	HCFC1R1
HLA-DMA	11	25	1	1	12	26	0.537696	0.00191396	0.00385689	HLA-DMA
IGKC	11	24	1	1	12	25	1	0.00191396	0.00385689	IGKC
IQGAP2	10	24	2	0	12	24	0.104762	0.000606107	0.00131541	IQGAP2
JTB	10	26	2	0	12	26	0.0938834	0.000606107	0.00131541	JTB
KIF1C	10	25	2	0	12	25	0.0990991	0.000606107	0.00131541	KIF1C
KRT18	10	26	2	0	12	26	0.0938834	0.000606107	0.00131541	KRT18
KRTCAP2	10	26	2	0	12	26	0.0938834	0.000606107	0.00131541	KRTCAP2
LAT	11	23	1	1	12	24	1	0.00191396	0.00385689	LAT
LINC00493	10	26	2	0	12	26	0.0938834	0.000606107	0.00131541	LINC00493
MGAT4B	11	23	1	1	12	24	1	0.00191396	0.00385689	MGAT4B
MRPL10	11	25	1	1	12	26	0.537696	0.00191396	0.00385689	MRPL10
MRPL57	11	25	1	1	12	26	0.537696	0.00191396	0.00385689	MRPL57
NDUFA1	11	25	1	1	12	26	0.537696	0.00191396	0.00385689	NDUFA1
NDUFA11	10	26	2	0	12	26	0.0938834	0.000606107	0.00131541	NDUFA11
NDUFAB1	11	25	1	1	12	26	0.537696	0.00191396	0.00385689	NDUFAB1
NDUFB1	10	26	2	0	12	26	0.0938834	0.000606107	0.00131541	NDUFB1
PCBD1	11	25	1	1	12	26	0.537696	0.00191396	0.00385689	PCBD1
PEBP1	11	25	1	1	12	26	0.537696	0.00191396	0.00385689	PEBP1
PIGH	11	23	1	1	12	24	1	0.00191396	0.00385689	PIGH
POMP	11	25	1	1	12	26	0.537696	0.00191396	0.00385689	POMP
PPP1CA	11	25	1	1	12	26	0.537696	0.00191396	0.00385689	PPP1CA
REXO2	11	25	1	1	12	26	0.537696	0.00191396	0.00385689	REXO2
RHOC	11	25	1	1	12	26	0.537696	0.00191396	0.00385689	RHOC
RNF5	10	26	2	0	12	26	0.0938834	0.000606107	0.00131541	RNF5
RPL24	11	25	1	1	12	26	0.537696	0.00191396	0.00385689	RPL24
RPS27L	11	25	1	1	12	26	0.537696	0.00191396	0.00385689	RPS27L
RPS3A	11	25	1	1	12	26	0.537696	0.00191396	0.00385689	RPS3A
S100A11	11	25	1	1	12	26	0.537696	0.00191396	0.00385689	S100A11
S100A9	10	25	2	0	12	25	0.0990991	0.000606107	0.00131541	S100A9
SAP18	10	26	2	0	12	26	0.0938834	0.000606107	0.00131541	SAP18
SEPW1	10	26	2	0	12	26	0.0938834	0.000606107	0.00131541	SEPW1
SLIRP	10	26	2	0	12	26	0.0938834	0.000606107	0.00131541	SLIRP
SNX3	11	25	1	1	12	26	0.537696	0.00191396	0.00385689	SNX3
TCIRG1	10	25	2	0	12	25	0.0990991	0.000606107	0.00131541	TCIRG1
TGFBR2	11	24	1	1	12	25	1	0.00191396	0.00385689	TGFBR2
TIMM8B	11	25	1	1	12	26	0.537696	0.00191396	0.00385689	TIMM8B
TMA7	11	25	1	1	12	26	0.537696	0.00191396	0.00385689	TMA7
TMEM98	11	24	1	1	12	25	1	0.00191396	0.00385689	TMEM98
TRAPPC2L	10	26	2	0	12	26	0.0938834	0.000606107	0.00131541	TRAPPC2L
TSTD1	11	25	1	1	12	26	0.537696	0.00191396	0.00385689	TSTD1
UCP2	11	24	1	1	12	25	1	0.00191396	0.00385689	UCP2
VTI1B	10	25	2	0	12	25	0.0990991	0.000606107	0.00131541	VTI1B
ZBED5-AS1	11	24	1	1	12	25	1	0.00191396	0.00385689	ZBED5-AS1
ZNF524	11	23	1	1	12	24	1	0.00191396	0.00385689	ZNF524
ALDOA	11	25	0	2	11	27	1	0.00191396	0.00385689	ALDOA
ATG4A	9	25	2	0	11	25	0.0873016	0.000170155	0.000397462	ATG4A
ATP5L	10	26	1	1	11	27	0.500711	0.000606107	0.00131541	ATP5L
BST2	11	25	0	2	11	27	1	0.00191396	0.00385689	BST2
C19orf60	11	25	0	2	11	27	1	0.00191396	0.00385689	C19orf60
CASP1	10	25	1	1	11	26	0.512012	0.000606107	0.00131541	CASP1
CCDC107	9	25	2	0	11	25	0.0873016	0.000170155	0.000397462	CCDC107
CD97	9	26	2	0	11	26	0.0825826	0.000170155	0.000397462	CD97
CDK2AP1	11	24	0	2	11	26	1	0.00191396	0.00385689	CDK2AP1
CIB1	10	26	1	1	11	27	0.500711	0.000606107	0.00131541	CIB1
CKLF	11	24	0	2	11	26	1	0.00191396	0.00385689	CKLF
CLTB	10	26	1	1	11	27	0.500711	0.000606107	0.00131541	CLTB
COPE	10	26	1	1	11	27	0.500711	0.000606107	0.00131541	COPE
CRABP2	10	24	1	1	11	25	0.52381	0.000606107	0.00131541	CRABP2
CSNK2B	10	26	1	1	11	27	0.500711	0.000606107	0.00131541	CSNK2B
CTSD	11	25	0	2	11	27	1	0.00191396	0.00385689	CTSD
DENND2D	10	26	1	1	11	27	0.500711	0.000606107	0.00131541	DENND2D
ESD	11	25	0	2	11	27	1	0.00191396	0.00385689	ESD
ETFB	11	25	0	2	11	27	1	0.00191396	0.00385689	ETFB
FAM65B	10	25	1	1	11	26	0.512012	0.000606107	0.00131541	FAM65B
FKBP2	10	26	1	1	11	27	0.500711	0.000606107	0.00131541	FKBP2
GLRX	10	26	1	1	11	27	0.500711	0.000606107	0.00131541	GLRX
GLUL	9	27	2	0	11	27	0.0782361	0.000170155	0.000397462	GLUL
IFI27L2	11	24	0	2	11	26	1	0.00191396	0.00385689	IFI27L2
IFI6	9	27	2	0	11	27	0.0782361	0.000170155	0.000397462	IFI6
IFITM3	11	25	0	2	11	27	1	0.00191396	0.00385689	IFITM3
IGHG1	10	25	1	1	11	26	0.512012	0.000606107	0.00131541	IGHG1
IL7R	11	23	0	2	11	25	1	0.00191396	0.00385689	IL7R
JOSD2	11	25	0	2	11	27	1	0.00191396	0.00385689	JOSD2
LAMTOR4	10	26	1	1	11	27	0.500711	0.000606107	0.00131541	LAMTOR4
LAPTM4A	10	26	1	1	11	27	0.500711	0.000606107	0.00131541	LAPTM4A
MPST	9	27	2	0	11	27	0.0782361	0.000170155	0.000397462	MPST
MRPL40	10	26	1	1	11	27	0.500711	0.000606107	0.00131541	MRPL40
MRPL54	11	25	0	2	11	27	1	0.00191396	0.00385689	MRPL54
MSMB	10	24	1	1	11	25	0.52381	0.000606107	0.00131541	MSMB
MT-ATP8	11	25	0	2	11	27	1	0.00191396	0.00385689	MT-ATP8
MT-ND2	11	25	0	2	11	27	1	0.00191396	0.00385689	MT-ND2
MYL12A	11	25	0	2	11	27	1	0.00191396	0.00385689	MYL12A
POLE4	10	26	1	1	11	27	0.500711	0.000606107	0.00131541	POLE4
PRDX5	9	27	2	0	11	27	0.0782361	0.000170155	0.000397462	PRDX5
PTRHD1	10	26	1	1	11	27	0.500711	0.000606107	0.00131541	PTRHD1
PXMP2	11	23	0	2	11	25	1	0.00191396	0.00385689	PXMP2
RAB13	11	25	0	2	11	27	1	0.00191396	0.00385689	RAB13
RABAC1	11	25	0	2	11	27	1	0.00191396	0.00385689	RABAC1
RPL18A	10	26	1	1	11	27	0.500711	0.000606107	0.00131541	RPL18A
RPL26L1	9	27	2	0	11	27	0.0782361	0.000170155	0.000397462	RPL26L1
RPL31	11	25	0	2	11	27	1	0.00191396	0.00385689	RPL31
RPL37	11	25	0	2	11	27	1	0.00191396	0.00385689	RPL37
RPL37A	10	26	1	1	11	27	0.500711	0.000606107	0.00131541	RPL37A
RPL4	10	26	1	1	11	27	0.500711	0.000606107	0.00131541	RPL4
RPS15	11	25	0	2	11	27	1	0.00191396	0.00385689	RPS15
RPS19	11	25	0	2	11	27	1	0.00191396	0.00385689	RPS19
RPS2	11	25	0	2	11	27	1	0.00191396	0.00385689	RPS2
RPS5	11	25	0	2	11	27	1	0.00191396	0.00385689	RPS5
RSL1D1	10	26	1	1	11	27	0.500711	0.000606107	0.00131541	RSL1D1
S100A6	10	26	1	1	11	27	0.500711	0.000606107	0.00131541	S100A6
SAA1	10	25	1	1	11	26	0.512012	0.000606107	0.00131541	SAA1
SF3B6	11	25	0	2	11	27	1	0.00191396	0.00385689	SF3B6
SLC25A5	11	25	0	2	11	27	1	0.00191396	0.00385689	SLC25A5
SLC25A6	11	25	0	2	11	27	1	0.00191396	0.00385689	SLC25A6
SRP14	9	27	2	0	11	27	0.0782361	0.000170155	0.000397462	SRP14
SUMO2	10	26	1	1	11	27	0.500711	0.000606107	0.00131541	SUMO2
SYNGR1	11	24	0	2	11	26	1	0.00191396	0.00385689	SYNGR1
TMEM141	10	26	1	1	11	27	0.500711	0.000606107	0.00131541	TMEM141
TMEM258	9	27	2	0	11	27	0.0782361	0.000170155	0.000397462	TMEM258
TSPO	11	25	0	2	11	27	1	0.00191396	0.00385689	TSPO
TUBB2A	11	24	0	2	11	26	1	0.00191396	0.00385689	TUBB2A
TWF2	11	25	0	2	11	27	1	0.00191396	0.00385689	TWF2
UBL7	11	25	0	2	11	27	1	0.00191396	0.00385689	UBL7
ZDHHC12	10	26	1	1	11	27	0.500711	0.000606107	0.00131541	ZDHHC12
ZFYVE21	10	25	1	1	11	26	0.512012	0.000606107	0.00131541	ZFYVE21
AGR2	9	25	1	1	10	26	0.484127	0.000170155	0.000397462	AGR2
ATP5E	9	27	1	1	10	28	0.462304	0.000170155	0.000397462	ATP5E
BAG1	8	28	2	0	10	28	0.0640114	4.19342e-05	0.000105537	BAG1
C9orf16	8	28	2	0	10	28	0.0640114	4.19342e-05	0.000105537	C9orf16
CD74	10	26	0	2	10	28	1	0.000606107	0.00131541	CD74
COX7A2	10	26	0	2	10	28	1	0.000606107	0.00131541	COX7A2
COX7C	9	27	1	1	10	28	0.462304	0.000170155	0.000397462	COX7C
CSTB	9	27	1	1	10	28	0.462304	0.000170155	0.000397462	CSTB
CYTIP	10	25	0	2	10	27	1	0.000606107	0.00131541	CYTIP
DCTN3	10	26	0	2	10	28	1	0.000606107	0.00131541	DCTN3
DCXR	10	26	0	2	10	28	1	0.000606107	0.00131541	DCXR
DUSP23	9	27	1	1	10	28	0.462304	0.000170155	0.000397462	DUSP23
EEF1G	10	26	0	2	10	28	1	0.000606107	0.00131541	EEF1G
GMPR2	9	25	1	1	10	26	0.484127	0.000170155	0.000397462	GMPR2
GRN	10	26	0	2	10	28	1	0.000606107	0.00131541	GRN
GUK1	9	27	1	1	10	28	0.462304	0.000170155	0.000397462	GUK1
HIGD1A	9	27	1	1	10	28	0.462304	0.000170155	0.000397462	HIGD1A
HINT1	10	26	0	2	10	28	1	0.000606107	0.00131541	HINT1
HSBP1	8	28	2	0	10	28	0.0640114	4.19342e-05	0.000105537	HSBP1
INO80C	9	26	1	1	10	27	0.472973	0.000170155	0.000397462	INO80C
KRT6A	10	24	0	2	10	26	1	0.000606107	0.00131541	KRT6A
LDHB	10	26	0	2	10	28	1	0.000606107	0.00131541	LDHB
LY6E	8	28	2	0	10	28	0.0640114	4.19342e-05	0.000105537	LY6E
MT-ND4	10	26	0	2	10	28	1	0.000606107	0.00131541	MT-ND4
MT-ND5	10	26	0	2	10	28	1	0.000606107	0.00131541	MT-ND5
MYD88	9	27	1	1	10	28	0.462304	0.000170155	0.000397462	MYD88
MZT2A	9	27	1	1	10	28	0.462304	0.000170155	0.000397462	MZT2A
NDUFC2	9	26	1	1	10	27	0.472973	0.000170155	0.000397462	NDUFC2
NEDD8	9	27	1	1	10	28	0.462304	0.000170155	0.000397462	NEDD8
NPC2	9	27	1	1	10	28	0.462304	0.000170155	0.000397462	NPC2
PHPT1	9	27	1	1	10	28	0.462304	0.000170155	0.000397462	PHPT1
PQLC3	10	24	0	2	10	26	1	0.000606107	0.00131541	PQLC3
PRDX1	9	27	1	1	10	28	0.462304	0.000170155	0.000397462	PRDX1
PRDX6	9	27	1	1	10	28	0.462304	0.000170155	0.000397462	PRDX6
PSMB8	9	27	1	1	10	28	0.462304	0.000170155	0.000397462	PSMB8
RBM3	10	26	0	2	10	28	1	0.000606107	0.00131541	RBM3
RHOA	9	27	1	1	10	28	0.462304	0.000170155	0.000397462	RHOA
RPL23	10	26	0	2	10	28	1	0.000606107	0.00131541	RPL23
RPL36A	10	26	0	2	10	28	1	0.000606107	0.00131541	RPL36A
RPL38	10	26	0	2	10	28	1	0.000606107	0.00131541	RPL38
RPL39	10	26	0	2	10	28	1	0.000606107	0.00131541	RPL39
RPL41.1	9	27	1	1	10	28	0.462304	0.000170155	0.000397462	RPL41.1
RPL8	10	26	0	2	10	28	1	0.000606107	0.00131541	RPL8
RPLP0	10	26	0	2	10	28	1	0.000606107	0.00131541	RPLP0
RPS11	9	27	1	1	10	28	0.462304	0.000170155	0.000397462	RPS11
RPS13	9	27	1	1	10	28	0.462304	0.000170155	0.000397462	RPS13
SDHD	10	26	0	2	10	28	1	0.000606107	0.00131541	SDHD
SERPINB1	9	26	1	1	10	27	0.472973	0.000170155	0.000397462	SERPINB1
SH3BGRL3	10	26	0	2	10	28	1	0.000606107	0.00131541	SH3BGRL3
SPCS1	9	27	1	1	10	28	0.462304	0.000170155	0.000397462	SPCS1
STOML2	9	27	1	1	10	28	0.462304	0.000170155	0.000397462	STOML2
TRAPPC1	9	27	1	1	10	28	0.462304	0.000170155	0.000397462	TRAPPC1
VAMP8	8	28	2	0	10	28	0.0640114	4.19342e-05	0.000105537	VAMP8
XBP1	9	27	1	1	10	28	0.462304	0.000170155	0.000397462	XBP1
ANXA5	8	27	1	1	9	28	0.432432	4.19342e-05	0.000105537	ANXA5
AQP3	9	25	0	2	9	27	1	0.000170155	0.000397462	AQP3
ARRB2	8	26	1	1	9	27	0.442857	4.19342e-05	0.000105537	ARRB2
BRK1	8	28	1	1	9	29	0.422475	4.19342e-05	0.000105537	BRK1
C11orf1	9	25	0	2	9	27	1	0.000170155	0.000397462	C11orf1
CARD16	9	27	0	2	9	29	1	0.000170155	0.000397462	CARD16
CHCHD10	9	26	0	2	9	28	1	0.000170155	0.000397462	CHCHD10
COMMD6	8	28	1	1	9	29	0.422475	4.19342e-05	0.000105537	COMMD6
CORO1A	9	25	0	2	9	27	1	0.000170155	0.000397462	CORO1A
COX4I1	8	28	1	1	9	29	0.422475	4.19342e-05	0.000105537	COX4I1
CRIP1	8	27	1	1	9	28	0.432432	4.19342e-05	0.000105537	CRIP1
CTSB	8	28	1	1	9	29	0.422475	4.19342e-05	0.000105537	CTSB
CUTA	8	28	1	1	9	29	0.422475	4.19342e-05	0.000105537	CUTA
CXCL16	8	28	1	1	9	29	0.422475	4.19342e-05	0.000105537	CXCL16
CYBA	9	27	0	2	9	29	1	0.000170155	0.000397462	CYBA
ECHS1	7	29	2	0	9	29	0.0512091	8.96304e-06	2.44674e-05	ECHS1
EEF1D	8	28	1	1	9	29	0.422475	4.19342e-05	0.000105537	EEF1D
ERGIC3	8	28	1	1	9	29	0.422475	4.19342e-05	0.000105537	ERGIC3
GNB2L1	9	27	0	2	9	29	1	0.000170155	0.000397462	GNB2L1
GPX1	8	28	1	1	9	29	0.422475	4.19342e-05	0.000105537	GPX1
HLA-A	9	27	0	2	9	29	1	0.000170155	0.000397462	HLA-A
HLA-DPB1	9	27	0	2	9	29	1	0.000170155	0.000397462	HLA-DPB1
HLA-DRB1	9	27	0	2	9	29	1	0.000170155	0.000397462	HLA-DRB1
ISCA2	8	28	1	1	9	29	0.422475	4.19342e-05	0.000105537	ISCA2
LSM3	8	28	1	1	9	29	0.422475	4.19342e-05	0.000105537	LSM3
MSRB1	8	28	1	1	9	29	0.422475	4.19342e-05	0.000105537	MSRB1
MT-ND1	9	27	0	2	9	29	1	0.000170155	0.000397462	MT-ND1
MT-ND4L	9	27	0	2	9	29	1	0.000170155	0.000397462	MT-ND4L
MT2A	8	28	1	1	9	29	0.422475	4.19342e-05	0.000105537	MT2A
MYL6	8	28	1	1	9	29	0.422475	4.19342e-05	0.000105537	MYL6
MZT2B	9	27	0	2	9	29	1	0.000170155	0.000397462	MZT2B
NDUFB11	9	27	0	2	9	29	1	0.000170155	0.000397462	NDUFB11
NDUFS5	8	28	1	1	9	29	0.422475	4.19342e-05	0.000105537	NDUFS5
NSA2	8	28	1	1	9	29	0.422475	4.19342e-05	0.000105537	NSA2
OST4	7	29	2	0	9	29	0.0512091	8.96304e-06	2.44674e-05	OST4
PPDPF	7	29	2	0	9	29	0.0512091	8.96304e-06	2.44674e-05	PPDPF
PRADC1	8	26	1	1	9	27	0.442857	4.19342e-05	0.000105537	PRADC1
PSMB9	9	27	0	2	9	29	1	0.000170155	0.000397462	PSMB9
RAB4A	7	27	2	0	9	27	0.0571429	8.96304e-06	2.44674e-05	RAB4A
RGS1	9	25	0	2	9	27	1	0.000170155	0.000397462	RGS1
RHOD	8	27	1	1	9	28	0.432432	4.19342e-05	0.000105537	RHOD
RPL19	9	27	0	2	9	29	1	0.000170155	0.000397462	RPL19
RPL23A	8	28	1	1	9	29	0.422475	4.19342e-05	0.000105537	RPL23A
RPL26	8	28	1	1	9	29	0.422475	4.19342e-05	0.000105537	RPL26
RPL27	8	28	1	1	9	29	0.422475	4.19342e-05	0.000105537	RPL27
RPL27A	9	27	0	2	9	29	1	0.000170155	0.000397462	RPL27A
RPL35	9	27	0	2	9	29	1	0.000170155	0.000397462	RPL35
RPL5	8	28	1	1	9	29	0.422475	4.19342e-05	0.000105537	RPL5
RPL6	8	28	1	1	9	29	0.422475	4.19342e-05	0.000105537	RPL6
RPL9	8	28	1	1	9	29	0.422475	4.19342e-05	0.000105537	RPL9
RPS16	8	28	1	1	9	29	0.422475	4.19342e-05	0.000105537	RPS16
RPS17	9	27	0	2	9	29	1	0.000170155	0.000397462	RPS17
RPS20	8	28	1	1	9	29	0.422475	4.19342e-05	0.000105537	RPS20
RPS23	9	27	0	2	9	29	1	0.000170155	0.000397462	RPS23
RPS8	8	28	1	1	9	29	0.422475	4.19342e-05	0.000105537	RPS8
STOM	8	27	1	1	9	28	0.432432	4.19342e-05	0.000105537	STOM
TCEA3	9	25	0	2	9	27	1	0.000170155	0.000397462	TCEA3
TCEAL3	9	26	0	2	9	28	1	0.000170155	0.000397462	TCEAL3
UBA52	9	27	0	2	9	29	1	0.000170155	0.000397462	UBA52
UQCRB	9	27	0	2	9	29	1	0.000170155	0.000397462	UQCRB
WFDC2	7	27	2	0	9	27	0.0571429	8.96304e-06	2.44674e-05	WFDC2
CASP4	7	28	1	1	8	29	0.39039	8.96304e-06	2.44674e-05	CASP4
CD247	8	26	0	1	8	27	1	4.19342e-05	0.000105537	CD247
CD96	8	26	0	2	8	28	1	4.19342e-05	0.000105537	CD96
CLIC1	7	29	1	1	8	30	0.381223	8.96304e-06	2.44674e-05	CLIC1
CST3	7	29	1	1	8	30	0.381223	8.96304e-06	2.44674e-05	CST3
DHRS7	8	27	0	2	8	29	1	4.19342e-05	0.000105537	DHRS7
EEF1A1	7	29	1	1	8	30	0.381223	8.96304e-06	2.44674e-05	EEF1A1
EIF3F	7	29	1	1	8	30	0.381223	8.96304e-06	2.44674e-05	EIF3F
FXYD5	8	26	0	2	8	28	1	4.19342e-05	0.000105537	FXYD5
HIGD2A	8	28	0	2	8	30	1	4.19342e-05	0.000105537	HIGD2A
LCN2	6	28	2	0	8	28	0.0444444	1.63612e-06	4.86692e-06	LCN2
LYZ	7	27	1	1	8	28	0.4	8.96304e-06	2.44674e-05	LYZ
MT-CO1	8	28	0	2	8	30	1	4.19342e-05	0.000105537	MT-CO1
MT-CO2	8	28	0	2	8	30	1	4.19342e-05	0.000105537	MT-CO2
MT-CO3	8	28	0	2	8	30	1	4.19342e-05	0.000105537	MT-CO3
MT-CYB	8	28	0	2	8	30	1	4.19342e-05	0.000105537	MT-CYB
NDUFAF3	7	29	1	1	8	30	0.381223	8.96304e-06	2.44674e-05	NDUFAF3
NDUFB8	8	28	0	2	8	30	1	4.19342e-05	0.000105537	NDUFB8
NENF	8	28	0	2	8	30	1	4.19342e-05	0.000105537	NENF
NUDT14	8	28	0	2	8	30	1	4.19342e-05	0.000105537	NUDT14
POLR2L	7	29	1	1	8	30	0.381223	8.96304e-06	2.44674e-05	POLR2L
RARRES3	6	30	2	0	8	30	0.0398293	1.63612e-06	4.86692e-06	RARRES3
RHOH	8	26	0	1	8	27	1	4.19342e-05	0.000105537	RHOH
RPL10	7	29	1	1	8	30	0.381223	8.96304e-06	2.44674e-05	RPL10
RPL12	7	29	1	1	8	30	0.381223	8.96304e-06	2.44674e-05	RPL12
RPL17	8	28	0	2	8	30	1	4.19342e-05	0.000105537	RPL17
RPL18	8	28	0	2	8	30	1	4.19342e-05	0.000105537	RPL18
RPL22	8	28	0	2	8	30	1	4.19342e-05	0.000105537	RPL22
RPL30	8	28	0	2	8	30	1	4.19342e-05	0.000105537	RPL30
RPL35A	8	28	0	2	8	30	1	4.19342e-05	0.000105537	RPL35A
RPL41	8	28	0	2	8	30	1	4.19342e-05	0.000105537	RPL41
RPL7	8	28	0	2	8	30	1	4.19342e-05	0.000105537	RPL7
RPLP1	8	28	0	2	8	30	1	4.19342e-05	0.000105537	RPLP1
RPS10	8	28	0	2	8	30	1	4.19342e-05	0.000105537	RPS10
RPS15A	8	28	0	2	8	30	1	4.19342e-05	0.000105537	RPS15A
RPS27A	8	28	0	2	8	30	1	4.19342e-05	0.000105537	RPS27A
RPS3	8	28	0	2	8	30	1	4.19342e-05	0.000105537	RPS3
RPS4X	8	28	0	2	8	30	1	4.19342e-05	0.000105537	RPS4X
SELK	8	28	0	2	8	30	1	4.19342e-05	0.000105537	SELK
SELM	8	26	0	2	8	28	1	4.19342e-05	0.000105537	SELM
TAF9.1	7	29	1	1	8	30	0.381223	8.96304e-06	2.44674e-05	TAF9.1
TMEM219	6	30	2	0	8	30	0.0398293	1.63612e-06	4.86692e-06	TMEM219
TOMM22	7	29	1	1	8	30	0.381223	8.96304e-06	2.44674e-05	TOMM22
TXN	7	29	1	1	8	30	0.381223	8.96304e-06	2.44674e-05	TXN
UBB	7	29	1	1	8	30	0.381223	8.96304e-06	2.44674e-05	UBB
UQCRQ	7	29	1	1	8	30	0.381223	8.96304e-06	2.44674e-05	UQCRQ
ARHGAP15	7	27	0	2	7	29	1	8.96304e-06	2.44674e-05	ARHGAP15
FABP5	6	29	1	1	7	30	0.346847	1.63612e-06	4.86692e-06	FABP5
FAU	6	30	1	1	7	31	0.338549	1.63612e-06	4.86692e-06	FAU
GLTSCR2	6	30	1	1	7	31	0.338549	1.63612e-06	4.86692e-06	GLTSCR2
HLA-B	6	30	1	1	7	31	0.338549	1.63612e-06	4.86692e-06	HLA-B
KRT7	7	28	0	2	7	30	1	8.96304e-06	2.44674e-05	KRT7
LGALS3	5	31	2	0	7	31	0.029872	2.49951e-07	8.29939e-07	LGALS3
LINC00152	5	29	2	0	7	29	0.0333333	2.49951e-07	8.29939e-07	LINC00152
MT-ATP6	7	29	0	2	7	31	1	8.96304e-06	2.44674e-05	MT-ATP6
NDUFB2	7	29	0	2	7	31	1	8.96304e-06	2.44674e-05	NDUFB2
NOP10	6	30	1	1	7	31	0.338549	1.63612e-06	4.86692e-06	NOP10
PFDN5	7	29	0	2	7	31	1	8.96304e-06	2.44674e-05	PFDN5
PSME1	6	29	1	1	7	30	0.346847	1.63612e-06	4.86692e-06	PSME1
PTPRC	7	29	0	2	7	31	1	8.96304e-06	2.44674e-05	PTPRC
RAB25	7	29	0	2	7	31	1	8.96304e-06	2.44674e-05	RAB25
RPL13A	7	29	0	2	7	31	1	8.96304e-06	2.44674e-05	RPL13A
RPL28	7	29	0	2	7	31	1	8.96304e-06	2.44674e-05	RPL28
RPL3	6	30	1	1	7	31	0.338549	1.63612e-06	4.86692e-06	RPL3
RPL7A	7	29	0	2	7	31	1	8.96304e-06	2.44674e-05	RPL7A
RPLP2	7	29	0	2	7	31	1	8.96304e-06	2.44674e-05	RPLP2
RPS12	6	30	1	1	7	31	0.338549	1.63612e-06	4.86692e-06	RPS12
RPS18	7	29	0	2	7	31	1	8.96304e-06	2.44674e-05	RPS18
RPS27	7	29	0	2	7	31	1	8.96304e-06	2.44674e-05	RPS27
RPS28	7	29	0	2	7	31	1	8.96304e-06	2.44674e-05	RPS28
S100A10	6	30	1	1	7	31	0.338549	1.63612e-06	4.86692e-06	S100A10
S100A2	7	28	0	2	7	30	1	8.96304e-06	2.44674e-05	S100A2
S100A4	7	29	0	2	7	31	1	8.96304e-06	2.44674e-05	S100A4
SAMSN1	7	27	0	2	7	29	1	8.96304e-06	2.44674e-05	SAMSN1
SERF2	6	30	1	1	7	31	0.338549	1.63612e-06	4.86692e-06	SERF2
SMDT1	5	31	2	0	7	31	0.029872	2.49951e-07	8.29939e-07	SMDT1
TAX1BP3	6	30	1	1	7	31	0.338549	1.63612e-06	4.86692e-06	TAX1BP3
TOMM7	6	30	1	1	7	31	0.338549	1.63612e-06	4.86692e-06	TOMM7
B2M	5	31	1	1	6	32	0.294452	2.49951e-07	8.29939e-07	B2M
C14orf2	5	31	1	1	6	32	0.294452	2.49951e-07	8.29939e-07	C14orf2
FTL	6	30	0	2	6	32	1	1.63612e-06	4.86692e-06	FTL
HLA-C	4	32	2	0	6	32	0.0213371	3.10815e-08	1.17045e-07	HLA-C
IFITM2	6	29	0	2	6	31	1	1.63612e-06	4.86692e-06	IFITM2
MYL12B	5	31	1	1	6	32	0.294452	2.49951e-07	8.29939e-07	MYL12B
PSMB10	6	30	0	2	6	32	1	1.63612e-06	4.86692e-06	PSMB10
RPL10A	6	30	0	2	6	32	1	1.63612e-06	4.86692e-06	RPL10A
RPL11	6	30	0	2	6	32	1	1.63612e-06	4.86692e-06	RPL11
RPL34	6	30	0	2	6	32	1	1.63612e-06	4.86692e-06	RPL34
RPL36AL	4	32	2	0	6	32	0.0213371	3.10815e-08	1.17045e-07	RPL36AL
RPS25	6	30	0	2	6	32	1	1.63612e-06	4.86692e-06	RPS25
RPS6	5	31	1	1	6	32	0.294452	2.49951e-07	8.29939e-07	RPS6
TIMP1	6	29	0	2	6	31	1	1.63612e-06	4.86692e-06	TIMP1
TMSB4X	6	30	0	2	6	32	1	1.63612e-06	4.86692e-06	TMSB4X
ACTG1	5	31	0	2	5	33	1	2.49951e-07	8.29939e-07	ACTG1
IFITM1	5	31	0	2	5	33	1	2.49951e-07	8.29939e-07	IFITM1
MT1X	4	32	1	1	5	33	0.248933	3.10815e-08	1.17045e-07	MT1X
POLR3GL	5	30	0	2	5	32	1	2.49951e-07	8.29939e-07	POLR3GL
RPL13	4	32	1	1	5	33	0.248933	3.10815e-08	1.17045e-07	RPL13
RPL14	4	32	1	1	5	33	0.248933	3.10815e-08	1.17045e-07	RPL14
RPL29	4	32	1	1	5	33	0.248933	3.10815e-08	1.17045e-07	RPL29
SSR4	4	32	1	1	5	33	0.248933	3.10815e-08	1.17045e-07	SSR4
BTF3	4	32	0	2	4	34	1	3.10815e-08	1.17045e-07	BTF3
RPL15	3	33	1	1	4	34	0.201991	3.02134e-09	1.3302e-08	RPL15
RPL21	4	32	0	2	4	34	1	3.10815e-08	1.17045e-07	RPL21
RPS14	4	32	0	2	4	34	1	3.10815e-08	1.17045e-07	RPS14
RPS9	4	32	0	2	4	34	1	3.10815e-08	1.17045e-07	RPS9
RPSA	4	32	0	2	4	34	1	3.10815e-08	1.17045e-07	RPSA
TPT1	3	33	1	1	4	34	0.201991	3.02134e-09	1.3302e-08	TPT1
PRDX4	3	33	0	2	3	35	1	3.02134e-09	1.3302e-08	PRDX4
RPL32	3	33	0	2	3	35	1	3.02134e-09	1.3302e-08	RPL32
RPS29	2	34	0	2	2	36	1	2.15323e-10	1.17708e-09	RPS29

## Sheet: GSEA_Up
Entrez Gene Id	Gene Symbol	HALLMARK_G2M_CHECKPOINT	HALLMARK_UV_RESPONSE_DN	HALLMARK_E2F_TARGETS	HALLMARK_MITOTIC_SPINDLE	HALLMARK_APICAL_JUNCTION	HALLMARK_P53_PATHWAY	HALLMARK_PI3K_AKT_MTOR_SIGNALING	HALLMARK_UNFOLDED_PROTEIN_RESPONSE	Entrez	Ensembl	Gene Description
11044	TENT4A	X	X									terminal nucleotidyltransferase 4A [Source:HGNC Symbol;Acc:HGNC:16705]
546	ATRX	X	X									ATRX chromatin remodeler [Source:HGNC Symbol;Acc:HGNC:886]
23649	POLA2	X		X								DNA polymerase alpha 2, accessory subunit [Source:HGNC Symbol;Acc:HGNC:30073]
2146	EZH2	X		X								enhancer of zeste 2 polycomb repressive complex 2 subunit [Source:HGNC Symbol;Acc:HGNC:3527]
5558	PRIM2	X		X								DNA primase subunit 2 [Source:HGNC Symbol;Acc:HGNC:9370]
7371	UCK2	X										uridine-cytidine kinase 2 [Source:HGNC Symbol;Acc:HGNC:12562]
3192	HNRNPU	X										heterogeneous nuclear ribonucleoprotein U [Source:HGNC Symbol;Acc:HGNC:5048]
10772	SRSF10	X										serine and arginine rich splicing factor 10 [Source:HGNC Symbol;Acc:HGNC:16713]
6760	SS18	X										SS18 subunit of BAF chromatin remodeling complex [Source:HGNC Symbol;Acc:HGNC:11340]
8452	CUL3	X										cullin 3 [Source:HGNC Symbol;Acc:HGNC:2553]
8899	PRPF4B	X										pre-mRNA processing factor 4B [Source:HGNC Symbol;Acc:HGNC:17346]
904	CCNT1	X										cyclin T1 [Source:HGNC Symbol;Acc:HGNC:1599]
5728	PTEN		X			X		X				phosphatase and tensin homolog [Source:HGNC Symbol;Acc:HGNC:9588]
5195	PEX14		X									peroxisomal biogenesis factor 14 [Source:HGNC Symbol;Acc:HGNC:8856]
27032	ATP2C1		X									ATPase secretory pathway Ca2+ transporting 1 [Source:HGNC Symbol;Acc:HGNC:13211]
4363	ABCC1		X									ATP binding cassette subfamily C member 1 [Source:HGNC Symbol;Acc:HGNC:51]
1859	DYRK1A		X									dual specificity tyrosine phosphorylation regulated kinase 1A [Source:HGNC Symbol;Acc:HGNC:3091]
22828	SCAF8		X									SR-related CTD associated factor 8 [Source:HGNC Symbol;Acc:HGNC:20959]
8455	ATRN		X									attractin [Source:HGNC Symbol;Acc:HGNC:885]
8621	CDK13		X									cyclin dependent kinase 13 [Source:HGNC Symbol;Acc:HGNC:1733]
4999	ORC2			X								origin recognition complex subunit 2 [Source:HGNC Symbol;Acc:HGNC:8488]
1434	CSE1L			X								chromosome segregation 1 like [Source:HGNC Symbol;Acc:HGNC:2431]
253714	MMS22L			X								MMS22 like, DNA repair protein [Source:HGNC Symbol;Acc:HGNC:21475]
29028	ATAD2			X								ATPase family AAA domain containing 2 [Source:HGNC Symbol;Acc:HGNC:30123]
3070	HELLS			X								helicase, lymphoid specific [Source:HGNC Symbol;Acc:HGNC:4861]
5591	PRKDC			X								protein kinase, DNA-activated, catalytic subunit [Source:HGNC Symbol;Acc:HGNC:9413]
9125	CNOT9			X								CCR4-NOT transcription complex subunit 9 [Source:HGNC Symbol;Acc:HGNC:10445]
9972	NUP153			X								nucleoporin 153 [Source:HGNC Symbol;Acc:HGNC:8062]
4763	NF1				X	X						neurofibromin 1 [Source:HGNC Symbol;Acc:HGNC:7765]
9732	DOCK4				X							dedicator of cytokinesis 4 [Source:HGNC Symbol;Acc:HGNC:19192]
10128	LRPPRC				X							leucine rich pentatricopeptide repeat containing [Source:HGNC Symbol;Acc:HGNC:15714]
23332	CLASP1				X							cytoplasmic linker associated protein 1 [Source:HGNC Symbol;Acc:HGNC:17088]
55125	CEP192				X							centrosomal protein 192 [Source:HGNC Symbol;Acc:HGNC:25515]
6654	SOS1				X							SOS Ras/Rac guanine nucleotide exchange factor 1 [Source:HGNC Symbol;Acc:HGNC:11187]
85464	SSH2				X							slingshot protein phosphatase 2 [Source:HGNC Symbol;Acc:HGNC:30580]
5747	PTK2					X						protein tyrosine kinase 2 [Source:HGNC Symbol;Acc:HGNC:9611]
5291	PIK3CB					X						phosphatidylinositol-4,5-bisphosphate 3-kinase catalytic subunit beta [Source:HGNC Symbol;Acc:HGNC:8976]
60412	EXOC4					X						exocyst complex component 4 [Source:HGNC Symbol;Acc:HGNC:30389]
8189	SYMPK					X						symplekin scaffold protein [Source:HGNC Symbol;Acc:HGNC:22935]
8745	ADAM23					X						ADAM metallopeptidase domain 23 [Source:HGNC Symbol;Acc:HGNC:202]
10057	ABCC5						X					ATP binding cassette subfamily C member 5 [Source:HGNC Symbol;Acc:HGNC:56]
55332	DRAM1						X					DNA damage regulated autophagy modulator 1 [Source:HGNC Symbol;Acc:HGNC:25645]
11059	WWP1						X					WW domain containing E3 ubiquitin protein ligase 1 [Source:HGNC Symbol;Acc:HGNC:17004]
27244	SESN1						X					sestrin 1 [Source:HGNC Symbol;Acc:HGNC:21595]
4193	MDM2						X					MDM2 proto-oncogene [Source:HGNC Symbol;Acc:HGNC:6973]
51768	TM7SF3						X					transmembrane 7 superfamily member 3 [Source:HGNC Symbol;Acc:HGNC:23049]
5883	RAD9A						X					RAD9 checkpoint clamp component A [Source:HGNC Symbol;Acc:HGNC:9827]
31	ACACA							X				acetyl-CoA carboxylase alpha [Source:HGNC Symbol;Acc:HGNC:84]
10298	PAK4							X				p21 (RAC1) activated kinase 4 [Source:HGNC Symbol;Acc:HGNC:16059]
200576	PIKFYVE							X				phosphoinositide kinase, FYVE-type zinc finger containing [Source:HGNC Symbol;Acc:HGNC:23785]
79109	MAPKAP1							X				MAPK associated protein 1 [Source:HGNC Symbol;Acc:HGNC:18752]
440	ASNS								X			asparagine synthetase (glutamine-hydrolyzing) [Source:HGNC Symbol;Acc:HGNC:753]
2521	FUS								X			FUS RNA binding protein [Source:HGNC Symbol;Acc:HGNC:4010]
4800	NFYA								X			nuclear transcription factor Y subunit alpha [Source:HGNC Symbol;Acc:HGNC:7804]
4848	CNOT2								X			CCR4-NOT transcription complex subunit 2 [Source:HGNC Symbol;Acc:HGNC:7878]
5073	PARN								X			poly(A)-specific ribonuclease [Source:HGNC Symbol;Acc:HGNC:8609]

## Sheet: GSEA_Down
Entrez Gene Id	Gene Symbol	HALLMARK_OXIDATIVE_PHOSPHORYLATION	HALLMARK_INTERFERON_GAMMA_RESPONSE	HALLMARK_INTERFERON_ALPHA_RESPONSE	HALLMARK_P53_PATHWAY	HALLMARK_MYC_TARGETS_V1	HALLMARK_ALLOGRAFT_REJECTION	HALLMARK_COMPLEMENT	HALLMARK_REACTIVE_OXYGEN_SPECIES_PATHWAY	HALLMARK_ADIPOGENESIS	HALLMARK_FATTY_ACID_METABOLISM	HALLMARK_CHOLESTEROL_HOMEOSTASIS	HALLMARK_DNA_REPAIR	HALLMARK_APOPTOSIS	HALLMARK_ESTROGEN_RESPONSE_EARLY	HALLMARK_ESTROGEN_RESPONSE_LATE	HALLMARK_INFLAMMATORY_RESPONSE	HALLMARK_MTORC1_SIGNALING	HALLMARK_PROTEIN_SECRETION	HALLMARK_ANDROGEN_RESPONSE	HALLMARK_UV_RESPONSE_UP	HALLMARK_PEROXISOME	HALLMARK_PI3K_AKT_MTOR_SIGNALING	HALLMARK_UNFOLDED_PROTEIN_RESPONSE	Entrez	Ensembl	Gene Description
3945	LDHB	X			X																						lactate dehydrogenase B [Source:HGNC Symbol;Acc:HGNC:6541]
4706	NDUFAB1	X				X				X																	NADH:ubiquinone oxidoreductase subunit AB1 [Source:HGNC Symbol;Acc:HGNC:7694]
1892	ECHS1	X								X	X																enoyl-CoA hydratase, short chain 1 [Source:HGNC Symbol;Acc:HGNC:3151]
2109	ETFB	X								X						X											electron transfer flavoprotein subunit beta [Source:HGNC Symbol;Acc:HGNC:3482]
1351	COX8A	X								X																	cytochrome c oxidase subunit 8A [Source:HGNC Symbol;Acc:HGNC:2294]
27089	UQCRQ	X								X																	ubiquinol-cytochrome c reductase complex III subunit VII [Source:HGNC Symbol;Acc:HGNC:29594]
6392	SDHD	X									X																succinate dehydrogenase complex subunit D [Source:HGNC Symbol;Acc:HGNC:10683]
10312	TCIRG1	X																									T cell immune regulator 1, ATPase H+ transporting V0 subunit a3 [Source:HGNC Symbol;Acc:HGNC:11647]
10632	ATP5MG	X																									ATP synthase membrane subunit g [Source:HGNC Symbol;Acc:HGNC:14247]
1327	COX4I1	X																									cytochrome c oxidase subunit 4I1 [Source:HGNC Symbol;Acc:HGNC:2265]
1347	COX7A2	X																									cytochrome c oxidase subunit 7A2 [Source:HGNC Symbol;Acc:HGNC:2288]
1350	COX7C	X																									cytochrome c oxidase subunit 7C [Source:HGNC Symbol;Acc:HGNC:2292]
26521	TIMM8B	X																									translocase of inner mitochondrial membrane 8 homolog B [Source:HGNC Symbol;Acc:HGNC:11818]
292	SLC25A5	X																									solute carrier family 25 member 5 [Source:HGNC Symbol;Acc:HGNC:10991]
293	SLC25A6	X																									solute carrier family 25 member 6 [Source:HGNC Symbol;Acc:HGNC:10992]
4694	NDUFA1	X																									NADH:ubiquinone oxidoreductase subunit A1 [Source:HGNC Symbol;Acc:HGNC:7683]
4707	NDUFB1	X																									NADH:ubiquinone oxidoreductase subunit B1 [Source:HGNC Symbol;Acc:HGNC:7695]
4708	NDUFB2	X																									NADH:ubiquinone oxidoreductase subunit B2 [Source:HGNC Symbol;Acc:HGNC:7697]
4714	NDUFB8	X																									NADH:ubiquinone oxidoreductase subunit B8 [Source:HGNC Symbol;Acc:HGNC:7703]
4718	NDUFC2	X																									NADH:ubiquinone oxidoreductase subunit C2 [Source:HGNC Symbol;Acc:HGNC:7706]
514	ATP5F1E	X																									ATP synthase F1 subunit epsilon [Source:HGNC Symbol;Acc:HGNC:838]
56993	TOMM22	X																									translocase of outer mitochondrial membrane 22 [Source:HGNC Symbol;Acc:HGNC:18002]
7381	UQCRB	X																									ubiquinol-cytochrome c reductase binding protein [Source:HGNC Symbol;Acc:HGNC:12582]
834	CASP1		X	X	X			X						X													caspase 1 [Source:HGNC Symbol;Acc:HGNC:1499]
567	B2M		X	X			X													X							beta-2-microglobulin [Source:HGNC Symbol;Acc:HGNC:914]
972	CD74		X	X			X																				CD74 molecule [Source:HGNC Symbol;Acc:HGNC:1697]
5698	PSMB9		X	X				X																			proteasome 20S subunit beta 9 [Source:HGNC Symbol;Acc:HGNC:9546]
5720	PSME1		X	X							X																proteasome activator subunit 1 [Source:HGNC Symbol;Acc:HGNC:9568]
9246	UBE2L6		X	X							X																ubiquitin conjugating enzyme E2 L6 [Source:HGNC Symbol;Acc:HGNC:12490]
10410	IFITM3		X	X										X													interferon induced transmembrane protein 3 [Source:HGNC Symbol;Acc:HGNC:5414]
4061	LY6E		X	X													X										lymphocyte antigen 6 family member E [Source:HGNC Symbol;Acc:HGNC:6727]
684	BST2		X	X													X										bone marrow stromal cell antigen 2 [Source:HGNC Symbol;Acc:HGNC:1119]
5696	PSMB8		X	X																							proteasome 20S subunit beta 8 [Source:HGNC Symbol;Acc:HGNC:9545]
10581	IFITM2		X	X																							interferon induced transmembrane protein 2 [Source:HGNC Symbol;Acc:HGNC:5413]
8673	VAMP8		X		X																						vesicle associated membrane protein 8 [Source:HGNC Symbol;Acc:HGNC:12647]
5699	PSMB10		X				X																				proteasome 20S subunit beta 10 [Source:HGNC Symbol;Acc:HGNC:9538]
3105	HLA-A		X				X																				major histocompatibility complex, class I, A [Source:HGNC Symbol;Acc:HGNC:4931]
3108	HLA-DMA		X				X																				major histocompatibility complex, class II, DM alpha [Source:HGNC Symbol;Acc:HGNC:4934]
837	CASP4		X					X						X													caspase 4 [Source:HGNC Symbol;Acc:HGNC:1505]
4615	MYD88		X																				X				MYD88 innate immune signal transduction adaptor [Source:HGNC Symbol;Acc:HGNC:7562]
4502	MT2A		X																								metallothionein 2A [Source:HGNC Symbol;Acc:HGNC:7406]
3106	HLA-B		X																								major histocompatibility complex, class I, B [Source:HGNC Symbol;Acc:HGNC:4932]
3123	HLA-DRB1		X																								major histocompatibility complex, class II, DR beta 1 [Source:HGNC Symbol;Acc:HGNC:4948]
8519	IFITM1			X													X										interferon induced transmembrane protein 1 [Source:HGNC Symbol;Acc:HGNC:5412]
3107	HLA-C			X																							major histocompatibility complex, class I, C [Source:HGNC Symbol;Acc:HGNC:4933]
10399	RACK1				X	X																					receptor for activated C kinase 1 [Source:HGNC Symbol;Acc:HGNC:4399]
6141	RPL18				X	X																					ribosomal protein L18 [Source:HGNC Symbol;Acc:HGNC:10310]
1509	CTSD				X			X																			cathepsin D [Source:HGNC Symbol;Acc:HGNC:2529]
2040	STOM				X					X																	stomatin [Source:HGNC Symbol;Acc:HGNC:3383]
6281	S100A10				X						X																S100 calcium binding protein A10 [Source:HGNC Symbol;Acc:HGNC:10487]
203	AK1				X								X														adenylate kinase 1 [Source:HGNC Symbol;Acc:HGNC:361]
51181	DCXR				X											X											dicarbonyl and L-xylulose reductase [Source:HGNC Symbol;Acc:HGNC:18985]
6275	S100A4				X																						S100 calcium binding protein A4 [Source:HGNC Symbol;Acc:HGNC:10494]
3006	H1-2				X																						H1.2 linker histone, cluster member [Source:HGNC Symbol;Acc:HGNC:4716]
30851	TAX1BP3				X																						Tax1 binding protein 3 [Source:HGNC Symbol;Acc:HGNC:30684]
3094	HINT1				X																						histidine triad nucleotide binding protein 1 [Source:HGNC Symbol;Acc:HGNC:4912]
51065	RPS27L				X																						ribosomal protein S27 like [Source:HGNC Symbol;Acc:HGNC:18476]
6206	RPS12				X																						ribosomal protein S12 [Source:HGNC Symbol;Acc:HGNC:10385]
10549	PRDX4					X			X																		peroxiredoxin 4 [Source:HGNC Symbol;Acc:HGNC:17169]
26156	RSL1D1					X																					ribosomal L1 domain containing 1 [Source:HGNC Symbol;Acc:HGNC:24534]
6128	RPL6					X																					ribosomal protein L6 [Source:HGNC Symbol;Acc:HGNC:10362]
6146	RPL22					X																					ribosomal protein L22 [Source:HGNC Symbol;Acc:HGNC:10315]
6164	RPL34					X																					ribosomal protein L34 [Source:HGNC Symbol;Acc:HGNC:10340]
6175	RPLP0					X																					ribosomal protein lateral stalk subunit P0 [Source:HGNC Symbol;Acc:HGNC:10371]
6187	RPS2					X																					ribosomal protein S2 [Source:HGNC Symbol;Acc:HGNC:10404]
6188	RPS3					X																					ribosomal protein S3 [Source:HGNC Symbol;Acc:HGNC:10420]
6193	RPS5					X																					ribosomal protein S5 [Source:HGNC Symbol;Acc:HGNC:10426]
6194	RPS6					X																					ribosomal protein S6 [Source:HGNC Symbol;Acc:HGNC:10429]
6204	RPS10					X																					ribosomal protein S10 [Source:HGNC Symbol;Acc:HGNC:10383]
9045	RPL14					X																					ribosomal protein L14 [Source:HGNC Symbol;Acc:HGNC:10305]
7076	TIMP1						X	X						X			X										TIMP metallopeptidase inhibitor 1 [Source:HGNC Symbol;Acc:HGNC:11820]
5788	PTPRC						X																				protein tyrosine phosphatase receptor type C [Source:HGNC Symbol;Acc:HGNC:9666]
10225	CD96						X																				CD96 molecule [Source:HGNC Symbol;Acc:HGNC:16892]
6133	RPL9						X																				ribosomal protein L9 [Source:HGNC Symbol;Acc:HGNC:10369]
6170	RPL39						X																				ribosomal protein L39 [Source:HGNC Symbol;Acc:HGNC:10350]
6189	RPS3A						X																				ribosomal protein S3A [Source:HGNC Symbol;Acc:HGNC:10421]
6203	RPS9						X																				ribosomal protein S9 [Source:HGNC Symbol;Acc:HGNC:10442]
6223	RPS19						X																				ribosomal protein S19 [Source:HGNC Symbol;Acc:HGNC:10402]
919	CD247						X																				CD247 molecule [Source:HGNC Symbol;Acc:HGNC:1677]
475	ATOX1							X	X																		antioxidant 1 copper chaperone [Source:HGNC Symbol;Acc:HGNC:798]
3958	LGALS3							X				X		X													galectin 3 [Source:HGNC Symbol;Acc:HGNC:6563]
308	ANXA5							X				X															annexin A5 [Source:HGNC Symbol;Acc:HGNC:543]
6280	S100A9							X								X											S100 calcium binding protein A9 [Source:HGNC Symbol;Acc:HGNC:10499]
1508	CTSB							X																			cathepsin B [Source:HGNC Symbol;Acc:HGNC:2527]
966	CD59							X																			CD59 molecule (CD59 blood group) [Source:HGNC Symbol;Acc:HGNC:1689]
51734	MSRB1							X																			methionine sulfoxide reductase B1 [Source:HGNC Symbol;Acc:HGNC:14133]
801	CALM1							X																			calmodulin 1 [Source:HGNC Symbol;Acc:HGNC:1442]
9588	PRDX6								X		X																peroxiredoxin 6 [Source:HGNC Symbol;Acc:HGNC:16753]
5052	PRDX1								X									X				X					peroxiredoxin 1 [Source:HGNC Symbol;Acc:HGNC:9352]
2745	GLRX								X									X									glutaredoxin [Source:HGNC Symbol;Acc:HGNC:4330]
7295	TXN								X																		thioredoxin [Source:HGNC Symbol;Acc:HGNC:12435]
2512	FTL								X																		ferritin light chain [Source:HGNC Symbol;Acc:HGNC:3999]
226	ALDOA									X	X							X			X						aldolase, fructose-bisphosphate A [Source:HGNC Symbol;Acc:HGNC:414]
7351	UCP2									X																	uncoupling protein 2 [Source:HGNC Symbol;Acc:HGNC:12518]
51635	DHRS7									X																	dehydrogenase/reductase 7 [Source:HGNC Symbol;Acc:HGNC:21524]
130814	SLC66A3									X																	solute carrier family 66 member 3 [Source:HGNC Symbol;Acc:HGNC:28503]
400916	CHCHD10									X																	coiled-coil-helix-coiled-coil-helix domain containing 10 [Source:HGNC Symbol;Acc:HGNC:15559]
2752	GLUL										X																glutamate-ammonia ligase [Source:HGNC Symbol;Acc:HGNC:4341]
5092	PCBD1										X																pterin-4 alpha-carbinolamine dehydratase 1 [Source:HGNC Symbol;Acc:HGNC:8646]
2171	FABP5											X				X											fatty acid binding protein 5 [Source:HGNC Symbol;Acc:HGNC:3560]
71	ACTG1											X															actin gamma 1 [Source:HGNC Symbol;Acc:HGNC:144]
58191	CXCL16											X															C-X-C motif chemokine ligand 16 [Source:HGNC Symbol;Acc:HGNC:16642]
6282	S100A11											X															S100 calcium binding protein A11 [Source:HGNC Symbol;Acc:HGNC:10488]
56655	POLE4												X														DNA polymerase epsilon 4, accessory subunit [Source:HGNC Symbol;Acc:HGNC:18755]
1603	DAD1												X														defender against cell death 1 [Source:HGNC Symbol;Acc:HGNC:2664]
2987	GUK1												X														guanylate kinase 1 [Source:HGNC Symbol;Acc:HGNC:4693]
51292	GMPR2												X														guanosine monophosphate reductase 2 [Source:HGNC Symbol;Acc:HGNC:4377]
64976	MRPL40												X														mitochondrial ribosomal protein L40 [Source:HGNC Symbol;Acc:HGNC:14491]
84265	POLR3GL												X														RNA polymerase III subunit GL [Source:HGNC Symbol;Acc:HGNC:28466]
8721	EDF1												X														endothelial differentiation related factor 1 [Source:HGNC Symbol;Acc:HGNC:3164]
3875	KRT18													X	X				X								keratin 18 [Source:HGNC Symbol;Acc:HGNC:6430]
706	TSPO													X								X					translocator protein [Source:HGNC Symbol;Acc:HGNC:1158]
2876	GPX1													X													glutathione peroxidase 1 [Source:HGNC Symbol;Acc:HGNC:4553]
7494	XBP1														X	X		X						X			X-box binding protein 1 [Source:HGNC Symbol;Acc:HGNC:12801]
573	BAG1														X	X											BAG cochaperone 1 [Source:HGNC Symbol;Acc:HGNC:937]
360	AQP3														X						X						aquaporin 3 (Gill blood group) [Source:HGNC Symbol;Acc:HGNC:636]
29984	RHOD														X												ras homolog family member D [Source:HGNC Symbol;Acc:HGNC:670]
4477	MSMB														X												microseminoprotein beta [Source:HGNC Symbol;Acc:HGNC:7372]
9145	SYNGR1														X												synaptogyrin 1 [Source:HGNC Symbol;Acc:HGNC:11498]
10551	AGR2															X											anterior gradient 2, protein disulphide isomerase family member [Source:HGNC Symbol;Acc:HGNC:328]
3575	IL7R																X										interleukin 7 receptor [Source:HGNC Symbol;Acc:HGNC:6024]
5996	RGS1																X										regulator of G protein signaling 1 [Source:HGNC Symbol;Acc:HGNC:9991]
11151	CORO1A																	X									coronin 1A [Source:HGNC Symbol;Acc:HGNC:2252]
2286	FKBP2																	X									FKBP prolyl isomerase 2 [Source:HGNC Symbol;Acc:HGNC:3718]
11316	COPE																		X								COPI coat complex subunit epsilon [Source:HGNC Symbol;Acc:HGNC:2234]
1211	CLTA																		X								clathrin light chain A [Source:HGNC Symbol;Acc:HGNC:2090]
51614	ERGIC3																		X								ERGIC and golgi 3 [Source:HGNC Symbol;Acc:HGNC:15927]
10627	MYL12A																			X							myosin light chain 12A [Source:HGNC Symbol;Acc:HGNC:16701]
10788	IQGAP2																			X							IQ motif containing GTPase activating protein 2 [Source:HGNC Symbol;Acc:HGNC:6111]
5867	RAB4A																			X							RAB4A, member RAS oncogene family [Source:HGNC Symbol;Acc:HGNC:9781]
1212	CLTB																				X						clathrin light chain B [Source:HGNC Symbol;Acc:HGNC:2091]
409	ARRB2																				X						arrestin beta 2 [Source:HGNC Symbol;Acc:HGNC:712]
6415	SELENOW																				X						selenoprotein W [Source:HGNC Symbol;Acc:HGNC:10752]
25824	PRDX5																					X					peroxiredoxin 5 [Source:HGNC Symbol;Acc:HGNC:9355]
1382	CRABP2																					X					cellular retinoic acid binding protein 2 [Source:HGNC Symbol;Acc:HGNC:2339]
5499	PPP1CA																						X				protein phosphatase 1 catalytic subunit alpha [Source:HGNC Symbol;Acc:HGNC:9281]
10094	ARPC3																						X				actin related protein 2/3 complex subunit 3 [Source:HGNC Symbol;Acc:HGNC:706]
1460	CSNK2B																						X				casein kinase 2 beta [Source:HGNC Symbol;Acc:HGNC:2460]
28972	SPCS1																							X			signal peptidase complex subunit 1 [Source:HGNC Symbol;Acc:HGNC:23401]
7280	TUBB2A																							X			tubulin beta 2A class IIa [Source:HGNC Symbol;Acc:HGNC:12412]
6208	RPS14																							X			ribosomal protein S14 [Source:HGNC Symbol;Acc:HGNC:10387]
