# Supplementary material for: Landscape of Epstein-Barr virus gene expression and perturbations in cancer
Source: Research Square preprint supplement (doi:10.21203/rs.3.rs-3911441/v1), 2024-02-02
Supplement: Supplementary file 8 [file e308930d1f8be53cbe3e1477.xlsx]

## Sheet: NPC_EBV
Designation	Sample ID	ppm	Geneid	BNRF1	oriP	BCRF1	EBNA1	EBNA-3B/EBNA-3C	EBNA-3A	EBNA2	EBNA-LP	BHLF1	oriLyt-1	BHRF1	BFLF1/2	BFRF1/2/3	BOLF1/BPLF1	EBNA-1.2	BORF1/2	BaRF1	BMRF1/2	BSLF1	BSLF2/BMLF1	BSRF1	BLLF3	BLRF1/2	BLLF1/2	BZLF2	BRLF1/BZLF1	BRRF1	BRRF2	BKRF2/3/4	BBLF4	BBRF1/2	BBLF2/BBLF3	BBRF3	BGLF3/3.5/4/5	BGRF1/BDRF1	BDLF3.5/4/BGLF1/2	BDLF1/2/3	BcLF1	BcRF1/BTRF1	BXLF1/2	BXRF1/BVRF1	BVLF1	BVRF2/BdRF1	BILF2	RPMS1	RPMS1/BAREs
NPC1	SRR5908786	1131.33		1.64524	0	0.0902615	0.522613	0.0446713	0	0.103908	0	0.156595	1.49363	0.0640598	0.0220252	0.144581	0.0559267	0	0.324121	0.125512	0.313568	0.013779	0	0	0.0625496	0	0.0411433	0	0.0784666	0.103719	0.0680325	0.211503	0	0.0195696	0.0256961	0.0412475	0.065314	0.110232	0.0596396	0.131657	0.0129531	0.031569	0.0672862	0.0246309	0	0.112738	0.278609	276.972	798.617
NPC2	SRR5908766	1094.4		3.35573	0	0	0.0581998	0.0388029	0.0423515	0.0376072	0	0	0.374255	0.0347777	0	0	0	0	0	0	0	0	0	0	0	0	0	0	0	0	0.0369345	0	0	0.0212484	0	0	0.0141835	0	0.016189	0	0	0.0171387	0	0	0.0621879	0.0306023	0.0756278	264.536	785.523
NPC3	SRR5908804	1031.22		1.52452	0.0684873	0	0.407159	0.785807	1.3099	0.166166	0	8.51434	0.505275	3.09889	1.83155	9.17132	8.48269	0	23.6191	4.71681	38.708	1.10175	0	1.82955	15.2542	4.40604	4.57277	0.543006	14.4304	6.75895	0.761569	20.801	1.25505	0.844966	12.677	1.84693	6.76824	1.01361	8.30944	2.42124	0.880351	0.668916	3.64771	0.846865	0.686936	4.16913	1.72648	131.876	402.197
NPC4	SRR5908757	1000.28		1.33662	0	0	0.388291	0.0323601	0.0470927	0	0	0.162054	0.277434	0.270697	0.0797758	0.407304	0.140239	0	0.818224	0.075768	1.89292	0.066544	0	0	0.755187	0.151203	0.0496741	0	0.757888	0.375671	0	0.984943	0.0848539	0.0472543	0.744574	0.149399	0.441595	0	0.342025	0.0454158	0.0156388	0.0190573	0.25996	0.0297379	0	0.102085	0	349.913	778.061
NPC5	SRR5908775	954.73		2.63675	0	0	0.355483	0.0169291	0.0184773	0.0328149	0	0.0635836	1.08854	0.303459	0	0.0456599	0.0529863	0	0.209373	0.0594566	0.548459	0.0391638	0	0.0747525	0.118522	0	0.0779604	0	0.111512	0.147398	0.0644556	0.286261	0	0.0185407	0.14607	0	0.0990081	0	0.098882	0	0.0245441	0	0.127497	0.0466719	0	0	0.0659903	241.419	690.653
NPC6	SRR5908803	809.92		2.91854	0.0241933	0	0.31794	0.0075706	0	0.0586986	0	0.0379124	0.048679	0.0271411	0	0	0.00364542	0	0.0374522	0	0	0	0	0	0	0	0	0	0.0166225	0.0439439	0.0288243	0.0512058	0	0.0165826	0	0.0349518	0.011069	0	0.0126342	0	0	0.0133753	0.0342097	0	0	0	0	193.204	510.324
NPC7	SRR5908853	773.96		2.02955	0	0	0.554389	0.017601	0	0.0341174	0	0.132215	0.0565874	0	0	0.0474722	0.0169506	0	0.0435366	0	0.237595	0.0135728	0	0	0	0.0616809	0.0405274	0	0	0.051083	0	0.0595247	0	0	0.0253114	0	0.0128673	0	0	0	0	0	0	0.0485244	0	0.0277625	0.0686096	211.503	639.438
NPC8	SRR5908771	764.57		3.7233	0	0.096711	3.64689	0.0382906	0.0208962	0	0	0.0239692	0.0615522	0.102956	0	0	0.0138284	0	0.0473564	0	0.129221	0	0	0	0	0	0.0220416	0.0909544	0.0420367	0.277824	0.255128	1.39207	0	0.0419358	0.0550643	0.176779	0.0279924	0	0.0319505	0	0	0	0.0288376	0	0	0	0.373146	183.333	605.704
NPC9	SRR5908841	662.54		0.626787	0.0277108	0	0.390178	0.00867129	0.0757145	0	0	0.347396	0.278783	0.21761	0.0641308	0.296243	0.0459297	0	0.500469	0.0609089	1.311	0.0534939	0	0	0.242834	0.243101	0.139763	0	0.26655	0.150999	0.19809	0.381229	0	0.0379871	0.448915	0.0800668	0.291601	0.213976	0.217066	0.0365092	0.113146	0.0153199	0.261223	0	0	0.273548	0.202807	156.298	451.536
NPC10	SRR5908837	545.36		2.11079	0	0	0.128887	0.0156239	0	0	0	0.039121	0.200923	0.0280063	0	0.0421396	0.00376163	0	0.012882	0	0	0	0	0	0	0	0	0	0	0	0	0.105676	0	0	0	0	0	0	0	0	0	0	0	0	0	0	0	104.954	364.128
NPC11	SRR5908763	484.07		0.253184	0	0.0874268	0.51918	0	0	0.0335481	0	0	0.445146	0	0.042667	0.01556	0	0	0.0142701	0	0.256994	0	0	0	0	0	0.0199256	0	0.0570018	0	0	0.0877972	0	0	0	0	0.0506102	0	0.0144416	0.0546525	0.0125463	0	0.0260692	0	0.0554756	0	0.13493	119.834	371.897
NPC12	SRR5908794	472.65		0.175882	0	0	0.076641	0.0204392	0	0	0	0.0767672	0.131424	0	0	0.0183757	0	0	0	0	0	0	0	0	0	0	0	0	0	0.11864	0.03891	0.069123	0	0	0	0	0	0	0	0	0.0148166	0	0	0	0	0	0.0796729	129.6	377.316
NPC13	SRR5908813	442.17		0.626564	0	0	0.265648	0	0	0	0	0.0492751	0.759223	0.0705511	0	0.0176924	0.00947598	0	0.0324513	0	0.0265648	0	0	0	0	0	0.0226562	0.0934907	0.0432089	0	0	0.133105	0.0516022	0.0215526	0	0	0.0143865	0.121402	0.0821037	0	0.0142656	0.017384	0	0	0	0.0310404	0.0767103	102.056	327.852
NPC14	SRR5908758	426.31		1.43552	0	0	1.61655	0	0	0	0	0	0.120524	0.0671986	0	0.0168517	0	0	0.0154546	0	0.20242	0	0	0	0.0656144	0	0.0215797	0	0.0411557	0.217601	0	0.285256	0.0245751	0	0.0269551	0	0.0274057	0	0.0312809	0	0.0135877	0	0.0141166	0	0	0	0.14613	49.432	298.614
NPC15	SRR5908747	405.44		0.95808	0	0	0.659189	0.0390661	0	0	0	0.0489092	1.06758	0.0700272	0.0240769	0.122927	0.0705421	0	0.257683	0.205806	0.764659	0.0301252	0	0.0862507	0	0.0684514	0.067464	0	0.407437	0	0.037185	0.0990878	0.0256096	0.0213925	0	0	0.0571186	0	0.0162988	0	0	0.0517647	0.0441325	0	0	0.0308099	0.0761407	123.343	319.003
NPC16	SRR5908762	400.53		0.672197	0	0	0.522147	0.0169817	0	0	0	0.0637814	1.14652	0.0304403	0	0	0.0122657	0	0.0280032	0	0.0458471	0.0130952	0	0	0	0	0	0	0.0186431	0	0.0323281	0	0	0	0	0	0.0124145	0.0523809	0	0	0	0	0.0255788	0.0234085	0	0	0	77.1627	250.002
NPC17	SRR5908754	393.13		0.922737	0	0	0.531056	0.0101161	0	0	0	0.0506601	0.390282	0.108801	0.0249388	0.0363794	0.00974232	0	0	0	0.245803	0	0	0	0.0708241	0.141804	0.0465861	0	0.0888468	0.0587196	0	0.136847	0.0265263	0	0.290953	0.046704	0.0591634	0	0.0506468	0.0638888	0.0146666	0	0.0761873	0	0	0	0	78.4113	307.804
NPC18	SRR5908795	388.87		1.14603	0	0	0.358933	0	0	0	0	0	6.95782	0.0746028	0	0	0	0	0.0171575	0	0.0280904	0	0	0	0	0.0729241	0	0	0.0685356	0	0	0.14075	0	0	0.0299252	0	0.0304254	0	0	0	0	0	0	0	0	0	0.162232	88.8625	291.975
NPC19	SRR5908811	375.62		1.11625	0	0	0.639282	0.0555941	0	0	0	0.162404	0.238314	0.332181	0.525372	0.849685	0.142773	0	0.672289	0.260336	3.5772	0.071451	0	0.163655	1.81636	0.259765	0.149344	0	0.447576	0.268916	0.105834	1.00274	0.0971851	0.0202955	0.852777	0.17111	0.474158	0.114322	0.510279	0.175553	0.0537343	0.0654803	0.293086	0.0255447	0	0.2923	0	112.829	280.098
NPC20	SRR5908834	357.71		1.09932	0	0	1.29131	0.0416583	0.030312	0	0	0	0.267863	0	0	0.0749051	0.013373	0	0.0457969	0	0.112469	0	0	0	0.194436	0	0	0	0	0	0	0.234806	0.0728236	0	0.0798763	0.064109	0.0203029	0	0	0	0	0	0.0418319	0	0	0	0.108257	140.932	353.139
NPC21	SRR5908836	336.63		1.89394	0	0	0.412645	0.00982564	0	0.076183	0	0	0.758148	0.281804	0	0	0.00946255	0	0	0	0.0265272	0	0	0	0	0	0	0	0.0647215	0.0570334	0.0748202	0	0	0	0	0	0	0	0	0	0	0	0	0	0	0.0309964	0.0766016	73.1338	225.062
NPC22	SRR5908833	335.24		0.753356	0	0	0.750347	0	0	0	0	0	1.87643	0	0	0	0.0100372	0	0	0	0	0	0	0	0	0	0.047996	0	0.0228839	0	0.0396818	0.105741	0	0	0	0.0481174	0	0	0.0347864	0	0	0	0	0	0	0	0	60.2981	253.015
NPC23	SRR5908846	332.75		1.51785	0	0	0.637787	0.0236236	0.0171894	0.0305275	0	0.0197172	0.0506333	0.0846921	0	0.0566363	0.0189589	0	0.116867	0	0.276374	0.0121447	0	0	0.0551303	0.0551909	0.126921	0	0.155609	0.0457081	0.149907	0.372831	0	0	0.135889	0.0727099	0.0805936	0.0485786	0.157696	0.0165773	0.0570832	0	0.023722	0.0217094	0	0.0993654	0.184172	77.3402	239.947
NPC24	SRR5908781	314.21		0.733417	0.0261894	0	0.405631	0.0327809	0.0536682	0	0	0.718206	3.00363	1.70406	0.404065	0.633635	0.410404	0	1.39195	0.11513	4.42507	0.0758354	0	0.0723741	0.918008	0.804139	0.0754799	0.0778667	1.72742	0.142708	0.0312024	1.94007	0.0214893	0.0179508	0.98996	0.0378355	1.09038	0.101114	0.341914	0.155271	0.0475263	0.0144788	0.209849	0	0.0525366	0.129265	0.127781	63.4683	196.167
NPC25	SRR5908800	304.52		0.837037	0	0	0.55156	0	0	0.0459876	0	0	0.305102	0.17011	0	0.063989	0	0	0	0	0.0640521	0	0	0	0	0	0	0	0.0260459	0.068856	0.0451649	0.0802347	0	0	0	0	0	0	0	0	0	0	0.0357356	0	0	0	0	60.0803	238.014
NPC26	SRR5908819	295.49		2.97551	0	0	0.391422	0.0163105	0	0	0	0.0408403	0.681699	0.0292371	0.0402095	0.0733193	0.00392695	0	0.0537927	0	0.110087	0	0	0	0.171287	0	0.018778	0	0	0.0473376	0.0621006	0.0275802	0	0	0	0	0	0	0	0	0.0118236	0	0	0	0	0	0	82.1279	213.957
NPC27	SRR5908815	287.14		1.39928	0	0.23469	0.383266	0.02323	0	0.090057	0	0.639828	7.46847	0.749531	0.0572679	0.125309	0.100672	0	0.612909	0	0.878027	0	0	0	0.813179	0.488443	0.267443	0	0.204022	0.13484	0.088446	0.392807	0	0.101766	0.200438	0.107248	0.271718	0.143308	0.348906	0.0489033	0.0673587	0	0.244932	0	0.14892	0.146565	0	45.3571	454.057
NPC28	SRR5908840	280.95		0.362464	0	0	0.481355	0.030087	0.0218924	0.0388799	0	0.0502237	0	0	0.024724	0.0721321	0.0338044	0	0.0496141	0	0.162457	0	0	0	0.140428	0.0702912	0.0923696	0	0.0660611	0	0.0381844	0.169585	0	0.043935	0.0576894	0	0	0	0.0836843	0.0422257	0	0.0177187	0.0302124	0	0	0.031638	0.234561	71.6248	196.158
NPC29	SRR5908796	270.01		0.297994	0	0	0.351363	0.0101852	0	0	0	0.051006	0.58942	0	0	0.0183139	0	0	0.0335913	0	0.0549959	0.0157084	0	0	0	0	0.0234521	0	0.0894535	0	0	0	0	0	0	0	0	0	0	0	0	0	0	0	0	0.0321308	0	77.5454	217.083
NPC30	SRR5908848	255.53		1.66639	0	0	0.297055	0.0220058	0.0240183	0	0	0	0.353744	0.118338	0	0.0197841	0.00529815	0	0.0544319	0	0.0891165	0	0	0	0	0	0.0506697	0	0.0483174	0.0638668	0	0.111632	0	0	0.0949371	0	0.0160874	0	0.0183621	0.023163	0.0159522	0	0.0662925	0.030334	0	0.0347102	0.0857796	58.7909	185.509
NPC31	SRR5908806	254.12		1.29787	0	0	0.178595	0	0	0.0307743	0	0	0	0.0284589	0	0.0142735	0	0	0	0	0	0	0	0	0	0	0	0	0.0522887	0	0	0	0	0	0	0	0	0	0	0	0	0	0.0119569	0	0	0	0.0618867	57.7588	183.966
NPC32	SRR5908825	248.61		1.81532	0	0	0.670657	0	0.0250273	0	0	0.717694	0.737208	0.164413	0.25438	0.164922	0.0331243	0	1.26672	0	1.331	0.0176823	0	0	0.401342	0.321426	0.105597	0.108936	0.302083	0.332749	0.174609	0.271416	0.120254	0.0251131	0.395702	0.105864	0.385553	0.141459	0.0574005	0.120681	0.0166223	0	0.120885	0.0316083	0	0.0361684	0.268149	38.7997	205.951
NPC33	SRR5908850	244.05		0.779041	0	0	0.890412	0	0.0161986	0	0	0	0.047715	0.0266036	0	0	0.00714646	0	0	0	0	0	0	0	0	0	0.0341731	0	0	0	0	0.150575	0	0	0.0213428	0	0	0	0	0	0	0	0	0	0	0	0	48.1103	161.61
NPC34	SRR5908760	235.13		1.00443	0	0	0.203209	0	0	0	0	0	0.670123	0.0373628	0	0	0	0	0.0343715	0	0.25323	0	0	0	0	0	0.0239968	0	0.0915312	0	0	0.105736	0	0	0	0	0.0457132	0	0.0695695	0	0	0	0.0156979	0	0	0	0	55.4811	175.635
NPC35	SRR5908807	235.07		0.357765	0	0	0.0984612	0.043764	0.0477663	0	0	0.0547908	0.703507	0.0784483	0.107889	0.373784	0.0790251	0	0.396922	0.0768517	1.152	0.0337479	0	0.0966227	0.229797	0.076683	0.0755769	0	0.168159	0.381045	0.0416567	0.555018	0.0286892	0	0.125871	0.101024	0.287943	0.0674959	0.365176	0.0460654	0	0.0193299	0.296638	0	0	0.103545	0.170594	71.3636	187.755
NPC36	SRR5908764	230.12		0.780674	0	0	0.448043	0.0110637	0.0483019	0.042891	0	0.0831077	0.0711395	0.0793279	0.0272747	0.0994671	0.0532741	0	0.237175	0	0.65713	0	0	0	0.0774578	0.0775428	0.101899	0	0.194337	0	0.0421237	0.448993	0	0	0.222744	0	0.12941	0	0.110781	0	0	0	0.0166647	0	0	0.17451	0.172507	56.6872	161.816
NPC37	SRR5908856	228.86		0.616488	0	0	0.277302	0	0	0	0	0.0867997	0.1486	0	0.0284864	0.0415543	0.0222563	0	0.0762187	0	0.374358	0.0178212	0	0.102047	0	0	0	0	0.0253713	0.0670725	0	0.0390783	0	0	0.199405	0	0.0337897	0	0.0578513	0	0.0167529	0	0.03481	0	0	0.0364524	0	74.0826	198.828
NPC38	SRR5908808	226.16		0.171866	0	0	0.368694	0.0230452	0.0167685	0	0	0	0.395149	0	0.0189374	0	0.0258925	0	0	0	0	0	0	0	0	0	0	0	0	0.044589	0.0292474	0.155872	0	0.033652	0	0	0	0	0	0	0	0	0	0	0	0	0.0598875	30.5008	117.171
NPC39	SRR5908789	225.24		1.08414	0	0	1.18918	0.0325829	0	0	0	0	0.698362	0.0389373	0	0.0976448	0	0	0	0	0.0293223	0.0167506	0	0.0959161	0	0	0.0250081	0	0.0715413	0.126086	0.041352	0.110192	0	0	0	0	0	0	0.0543758	0	0	0	0.0163594	0	0	0	0	53.7984	147.05
NPC40	SRR5908798	220.81		0.128452	0	0	0.573728	0.00932964	0	0	0	0.0233607	0.119979	0.0334474	0.0229999	0	0	0	0.0153848	0	0.0251881	0	0	0	0	0	0	0	0.0614544	0	0	0.0946554	0	0	0	0.0430729	0	0	0	0.0196405	0	0	0	0	0	0.0294317	0	49.5141	183.529
NPC41	SRR5908810	213.05		0.693176	0	0	0.413925	0	0	0	0	0	0.191838	0.0267399	0.0183875	0.0134114	0.00359153	0	0	0	0.0201369	0	0	0	0	0	0	0	0	0	0.0567964	0.100898	0	0	0	0	0.0109054	0	0.0124474	0	0	0	0	0	0	0	0.0581487	21.2829	162.548
NPC42	SRR5908767	212.91		0.173764	0	0	0.731944	0.00841381	0.0183666	0.0326182	0	0	0.0541009	0.030164	0	0	0.00810289	0	0	0	0.0227155	0	0	0	0	0	0	0	0.0184739	0.0488383	0.0961041	0.142273	0	0	0	0	0	0	0	0	0.0121985	0	0	0	0	0	0.0655948	52.0132	160.266
NPC43	SRR5908809	210.21		0.128837	0	0	0.617554	0	0	0	0	0.0702922	0	0	0	0	0.0135177	0	0.0462926	0	0.0505271	0	0	0	0.131027	0	0	0	0.0205462	0	0.0712562	0.253171	0	0	0.0538273	0	0	0	0	0.0196994	0.0135668	0	0.0281898	0.0257981	0	0	0	63.427	167.109
NPC44	SRR5908799	194.43		0.269601	0	0	0.913728	0	0	0	0	0	0.223838	0	0	0	0	0	0	0	0	0	0	0	0	0	0	0	0.0191086	0	0.165676	0.588641	0	0	0.050061	0	0	0	0	0	0	0	0.0131087	0	0	0	0	35.9807	126.629
NPC45	SRR5908791	189.08		0.644451	0	0	0.573593	0	0.0173916	0	0	0.0598476	1.12704	0.0285629	0	0	0.0115092	0	0.013138	0	0.0215097	0	0	0	0	0.0558403	0.0183449	0	0	0	0.0606684	0.0808323	0.0208914	0.0174513	0	0	0.0116488	0	0.013296	0.0167723	0.011551	0	0	0	0	0	0	21.4549	104.343
NPC46	SRR5908788	187.94		0.311556	0	0	0.905077	0	0	0	0	0.021585	0.166289	0	0	0	0.00415095	0	0.0426459	0	0.0930937	0	0	0	0	0.0604189	0	0	0	0	0.065643	0.0874602	0.0226044	0.0188822	0.0247935	0	0	0	0.0287724	0	0	0	0	0	0	0	0	32.5053	147.806
NPC47	SRR5908784	186.05		1.03778	0	0	0.0983075	0	0	0.101638	0	0.0656462	0.084289	0.140986	0	0.0471411	0.0126243	0	0.0216165	0	0.0353907	0	0	0	0	0	0	0	0.0287823	0.07609	0.0499099	0	0	0	0	0	0	0	0.0218764	0	0	0	0.019745	0	0	0	0	57.4169	152.114
NPC48	SRR5908845	185.64		0.392973	0	0	0.342478	0.0114168	0.0249219	0	0	0.0571737	0.440462	0	0	0.0205284	0.0384823	0	0	0	0.0616461	0	0	0	0.0799304	0	0	0	0.0752027	0.0662696	0.0434684	0.115831	0	0	0	0	0.0333852	0	0	0.0240345	0	0	0.0171966	0	0	0.0720321	0	48.9966	143.497
NPC49	SRR5908797	178.11		1.06951	0	0	0.69578	0.00875263	0.0191062	0	0	0	0.506516	0	0	0	0.0126438	0	0.0288665	0	0	0	0	0	0	0	0	0	0.0192179	0.10161	0	0.0592008	0	0	0	0.0404089	0	0	0.0146068	0.0184258	0	0	0	0	0	0	0	46.7959	113.257
NPC50	SRR5908814	175.03		0.0542831	0	0	0.362695	0.0210274	0	0	0	0.052651	0.270413	0.113077	0	0.0189046	0.0303756	0	0.0173373	0	0.0567696	0	0	0	0	0	0	0	0.0461692	0.0610273	0.0400299	0	0	0	0	0	0.0153721	0	0.0175458	0	0	0	0.0316726	0	0	0	0	48.1862	134.318
NPC51	SRR5908854	172.34		0.320176	0	0	0.159449	0.00885897	0	0	0	0.0221822	0	0.0635199	0.0218396	0	0.0085316	0	0.0146086	0	0.167421	0.0136629	0	0	0	0.0620906	0.0203983	0	0.0194513	0.0514223	0.0337296	0.08988	0	0	0.0254795	0	0	0	0.0147842	0.0372994	0	0	0	0.0244234	0	0.0558938	0.0690653	34.0432	138.821
NPC52	SRR5908802	171.18		0.929567	0	0	1.11193	0.0105907	0	0	0	0	0.136196	0	0	0	0.00509966	0	0.0174642	0	0.0285926	0	0	0	0	0	0	0	0.0232536	0	0.0806458	0.179082	0	0	0	0	0	0	0	0	0	0	0	0	0	0.0668196	0.0825659	42.155	126.08
NPC53	SRR5908756	171.17		0.671274	0	0	0.868665	0.0118195	0	0	0	0.0591902	0	0.0423736	0	0.106262	0.0455309	0	0.136434	0.0830225	0.255281	0	0	0	0.0827494	0	0.0544302	0	0.129758	0	0	0.319777	0.0619856	0	0	0	0.0864065	0	0.0197249	0.0248821	0	0	0.0712125	0	0	0.0372863	0.0921459	40.6572	123.897
NPC54	SRR5908790	167.21		0.865278	0.0277017	0	0.429054	0.0260053	0	0.100816	0	0	0.0557381	0.0310769	0.0427398	0	0.00834811	0	0.0285888	0	0	0	0	0	0.0606886	0	0.0199596	0	0.019033	0.0503163	0.0330042	0.146578	0	0.0189873	0	0	0	0	0.0289326	0.0547458	0.0125677	0	0.0261137	0	0	0.0273458	0.13516	35.2989	123.442
NPC55	SRR5908769	165.8		0.0655515	0	0	0.491305	0	0	0	0	0.0190742	0.0979641	0.0546201	0	0.0273946	0.00733623	0	0.100494	0.0535085	0.143964	0	0	0	0	0.053391	0.0350806	0	0.066904	0.0442174	0.0290037	0.154574	0	0	0.0219095	0	0.0222758	0.0469944	0.0254256	0.0160367	0	0.0134585	0.0344226	0	0	0.0720937	0.0593885	33.466	108.746
NPC56	SRR5908776	159.97		0.646876	0	0	1.636	0.0515895	0.0482636	0	0	1.49475	2.55899	0.290639	0.2907	0.649337	0.0603295	0	0.583352	0.362375	3.6213	0.079565	0	0	0.257988	0.154963	0.271515	0	0.566367	0.171116	0.112241	0.822501	0.0579758	0.0161431	0.445134	0.102076	0.431024	0.0909314	0.307482	0.139635	0.0747955	0.0130208	0.321928	0.0203182	0	0.325493	0.0574567	10.9856	52.0197
NPC57	SRR5908849	159.39		1.3353	0	0	0.244006	0	0	0	0	0	0.160932	0.0448638	0	0	0	0	0	0	0.0337854	0	0	0	0	0	0	0	0	0.0726387	0	0	0	0.0274108	0	0	0	0	0	0	0	0	0	0	0	0	0	49.073	125.752
NPC58	SRR5908818	158.83		0.76391	0	0	0.558756	0.00792624	0.0173022	0	0	0	0.305795	0.113664	0	0	0.00763334	0	0	0	0.0427983	0.0122244	0	0	0	0	0	0	0.0348068	0.138025	0	0	0	0	0	0	0	0	0	0	0.0114916	0	0	0	0	0	0	34.0163	111.118
NPC59	SRR5908820	158.67		0.435275	0	0	0.39084	0	0	0	0	0.115142	0.0492804	0	0	0.0275615	0.0332141	0	0.0252766	0	0.0206915	0	0	0	0	0	0	0	0.0168279	0.13346	0.0583607	0	0	0	0.022043	0	0.0112057	0.0945612	0	0	0	0	0.0115441	0	0	0	0	30.4058	115.955
NPC60	SRR5908821	157.58		0.24164	0	0	0.526476	0	0	0	0	0	2.06355	0	0	0	0	0	0	0	0	0	0	0	0	0.0702904	0.0230922	0	0.0880805	0	0.038184	0.0678332	0	0	0	0	0	0	0	0	0	0	0	0	0	0	0	34.0707	109.549
NPC61	SRR5908829	155.54		0.579737	0	0	0.480598	0.016432	0.0179347	0	0	0.102861	0.105658	0.0589097	0.0202545	0.0147731	0.019781	0	0.0541933	0.0577108	0.0887258	0	0	0	0	0.0575841	0.0378357	0	0.0360792	0.0476901	0.0938446	0.138928	0	0.0179963	0.0236302	0.0758628	0.0240252	0.0506851	0.0411337	0.0345922	0	0	0	0.0226507	0	0.0259185	0	33.7256	97.8247
NPC62	SRR5908826	154.36		1.26229	0	0	0.264022	0.0195587	0	0	0	0.0489736	1.19475	0.0701194	0	0.0175841	0	0	0	0	0	0	0	0	0	0	0	0	0	0.0567648	0.0372339	0	0	0	0	0	0	0	0	0	0	0	0	0	0	0	0	32.0696	119.398
NPC63	SRR5908773	151.02		0.272828	0	0	0.601421	0.0279752	0	0	0	0.0700478	0.0599604	0	0.0229887	0.117371	0.035922	0	0.0615089	0	0.0755272	0.0143818	0	0	0	0.0653575	0.0214716	0	0.0204748	0.108256	0.0710085	0.189218	0.024452	0	0.10728	0.0430518	0.0272684	0	0.0466863	0.0981547	0.0540787	0.03295	0.0561837	0.0257084	0	0.117669	0.0726992	32.1684	109.619
NPC64	SRR5908753	149.39		0.204585	0	0	0.341735	0.0396246	0.0216242	0	0	0.0496084	0.636966	0.0355142	0.0244211	0.0356242	0.00954008	0	0.130683	0	0.133722	0	0	0	0.0693539	0	0.0228095	0	0.0217506	0	0	0.167507	0	0.0216984	0	0	0.0144838	0	0	0	0	0	0.0298423	0.0273103	0	0.125001	0	38.0348	118.954
NPC65	SRR5908759	145.08		0.211154	0	0	0.669171	0.0111537	0.0243475	0	0	0	0.430312	0.319895	0.0274967	0.120332	0.0698202	0	0.220712	0.0783461	1.11417	0.0344041	0	0	0.156177	0.156348	0.0256821	0	0.195919	0.194227	0.0849333	0.829854	0.029247	0.0244311	0.0641591	0.102989	0.0652316	0	0.130297	0.0469611	0.0485126	0	0.0336006	0	0	0.17593	0	39.6094	114.469
NPC66	SRR5908774	143.01		0.377325	0	0	0.328841	0.0208804	0.02279	0.0404741	0	0.235273	0.0671307	0.0748577	0.0514755	0.112634	0.0201088	0	0.0688645	0	0.225491	0.0161016	0	0	0.073093	0.146346	0.120196	0	0.252156	0.0606007	0	0.635538	0	0	0.0600548	0.1446	0.0152647	0	0.104539	0.109893	0.0605457	0.0184452	0.0314512	0	0	0.329352	0.0813929	25.3099	109.439
NPC67	SRR5908827	142.27		0.577281	0	0	0.0762279	0.0101645	0	0	0	0	0.196074	0.0364404	0	0	0	0	0.0167615	0	0.027442	0	0	0	0	0	0	0	0.0223179	0.118001	0.0387003	0.0343752	0	0	0	0	0	0	0	0	0	0	0	0	0	0	0.0792435	35.93	101.485
NPC68	SRR5908782	131.5		0.681118	0	0	0.327503	0.027294	0	0	0	0.0683421	0.175501	0.0489254	0	0.0736155	0.00657136	0	0.0225042	0	0.147376	0	0	0	0	0	0	0	0.0599286	0	0.0519596	0.138458	0	0	0	0	0	0	0.0683242	0	0.0197857	0	0.0205558	0	0	0.0861029	0	29.3733	121.175
NPC69	SRR5908779	131.48		0.637685	0	0	0.374525	0.00805493	0.0175832	0	0	0.0201689	0	0.0866323	0	0	0.0116359	0	0	0	0.0434932	0	0	0	0	0	0.018547	0.0765338	0.0176859	0	0	0.0272408	0	0	0	0	0	0	0	0	0	0	0	0.0222067	0	0	0.062797	27.9979	86.9909
NPC70	SRR5908839	128.58		0.156191	0	0.083353	0.358866	0.00825045	0	0	0	0	0.848807	0.0591568	0.0203394	0.163185	0.00794556	0	0.136051	0.0579528	0.645959	0.0254488	0	0	0.346573	0.115651	0.0379943	0	0.326074	0.0478901	0	0.306923	0.0216341	0.0180717	0.071188	0.114271	0.096504	0	0.123918	0	0.0239233	0.0291528	0.1367	0.0227457	0	0.0260272	0.128642	27.5964	89.3307
NPC71	SRR5908855	127.89		0.471478	0	0	0.858048	0.00805742	0.0175886	0	0	0	2.64227	0	0	0	0.00775967	0	0	0	0	0	0	0	0	0	0.0371054	0	0.0353828	0	0.0306778	0.0817478	0	0	0	0	0.0117808	0	0	0	0.0116818	0	0.0121365	0	0	0	0.0628164	29.2208	88.9948
NPC72	SRR5908748	127.44		0.713054	0	0	0.39315	0	0.0184576	0	0	0.105859	0.326214	0.0303135	0.0208449	0.0760185	0.00407152	0	0.0418298	0	0.0684841	0.0130407	0	0	0	0.0592627	0	0	0.0371309	0	0	0.171573	0	0.0185209	0.0729572	0.0390371	0.0741768	0	0.0423327	0.0356006	0	0	0.0127361	0.0466221	0	0.0533482	0.197759	29.0579	82.8622
NPC73	SRR5908787	125.35		0.0689951	0	0	0.811749	0	0	0	0	0	0.32222	0	0	0	0.00965202	0	0	0.0703992	0	0	0	0	0	0	0	0	0	0	0.0381592	0.135578	0	0.021953	0	0	0	0	0.0167258	0	0	0	0	0	0	0	0	26.7595	99.5671
NPC74	SRR5908750	124.11		0.732059	0	0	0.152564	0	0	0	0	0.0463075	0.297292	0.0331511	0	0.0166269	0.0133579	0	0.0762424	0	0.0499299	0	0	0	0	0.12962	0.0212918	0	0	0	0.070414	0.0625446	0	0.0202546	0	0	0.0135201	0	0.0308636	0.116799	0.0134065	0	0.0278566	0	0	0.029171	0.144181	16.4494	61.3792
NPC75	SRR5908777	123.94		0.635703	0	0	1.32964	0.0410416	0	0	0	0.020553	2.26952	0.0294274	0	0.0590371	0.007905	0	0.0541427	0	0.177286	0	0	0	0.0574673	0	0.0567005	0	0.072091	0.0476456	0.0312523	0.471913	0.0215237	0	0	0.037896	0.0120014	0	0	0	0	0.014502	0	0	0	0	0	22.3194	58.9368
NPC76	SRR5908844	123.51		0.411253	0	0	0.228079	0.0217235	0	0	0	1.27826	0.349206	0.467281	0.160662	0.214834	0.0418415	0	0.376136	0.0762951	0.674462	0.067007	0	0.0959229	0.228132	0.152255	0.225088	0	0.19079	0.189143	0.0827099	0.771397	0.0569628	0.0237915	0.218678	0.0501462	0.0794049	0	0.0906328	0	0.0472427	0.0191899	0.130884	0.0299448	0.0696308	0.342649	0.338717	24.3391	89.9315
NPC77	SRR5908859	123.47		0.306409	0	0	0.296708	0.00989104	0	0	0	0.222897	0.127199	0.28368	0.0487678	0.320129	0.00476277	0	0.391452	0.0694767	1.04144	0.0152547	0	0.174701	1.17722	0.346621	0.204972	0	0.304044	0.229652	0.0376591	0.836259	0.0778081	0.0216653	0.312927	0.0456647	0.188002	0	0.478692	0.145757	0.071701	0.104849	0.208577	0.0545374	0.0634079	0.187216	0.462669	20.8354	63.8477
NPC78	SRR5908749	120.81		0.213434	0	0	0.858502	0.00953966	0.0208242	0	0	0.0716596	0.3067	0	0.0235176	0.0171531	0.00918713	0	0.0629243	0	0.20604	0	0	0	0	0	0.0878625	0	0.0837836	0.0553734	0	0.193572	0	0.0208956	0.137186	0.0880849	0.0418439	0	0.0477606	0	0.0276615	0.0168541	0.0143691	0	0.0611553	0.0300942	0	31.5336	109.854
NPC79	SRR5908780	112.03		0.0673922	0	0	0.64606	0	0.0170957	0	0	0.254928	0.0503575	0	0	0.014082	0	0	0.0516581	0	0.0211438	0	0	0	0	0	0	0	0.0171957	0.0454591	0.0894544	0.158914	0	0.0343088	0.0450496	0.0361569	0.0229013	0	0	0	0	0	0.0235928	0.0215911	0	0	0	20.9616	75.0003
NPC80	SRR5908768	111.83		0.0557206	0.0258663	0	0.546309	0	0	0	0	0	0.208181	0	0	0.0145539	0.007795	0	0.040042	0	0.0874095	0.0124833	0	0	0	0	0	0	0	0.0469826	0.12327	0.0273733	0	0	0.0465593	0	0	0	0.067539	0	0	0	0.0121918	0.0223147	0	0	0.0631024	22.1944	85.6519
NPC81	SRR5908783	104.69		0.346136	0	0	1.07735	0.0143659	0.0156797	0	0	0.323739	0.138559	0.128756	0.0885386	0.180817	0.0760924	0	0.106603	0.0504543	0.426632	0.011078	0	0.0634343	0.251442	0	0.0661565	0	0.0946279	0.0833872	0.136741	0.340086	0.0753396	0.0157334	0.123954	0	0.063013	0.0443121	0.143846	0.120971	0.0312418	0	0.0432772	0.0198027	0	0.0906383	0.167996	11.8834	66.6014
NPC82	SRR5908830	103.37		0.509367	0	0	1.37337	0.0647429	0.0807587	0	0	0.532651	1.01101	1.69107	0.798038	1.61316	0.155876	0	1.54043	0.389801	6.09276	0.185438	0	0.490081	1.35981	0.518593	0.255556	0.0878791	0.812308	0.751606	0.0352145	2.43976	0.169767	0.0202589	1.30346	0.384304	1.39287	0.342347	0.478489	0.447827	0.160912	0.0326811	0.459733	0.0764958	0	0.96285	0.216318	9.45361	28.4439
NPC83	SRR5908778	101.48		0.210392	0	0	1.38224	0.0376148	0	0	0	0.0470923	0.181398	0	0	0	0.149427	0	0.0155069	0	0.076164	0	0	0	0	0	0	0	0.0206474	0	0.214822	0.0954067	0	0	0.0270462	0	0	0	0	0	0	0	0.0141643	0	0	0	0	25.8778	82.8731
NPC84	SRR5908843	99.7		0.909318	0	0	0.110947	0	0	0.0409663	0	0	0.203841	0.113652	0	0.0380014	0	0	0.0174255	0	0	0	0	0	0	0.074063	0.0243316	0	0.046404	0	0	0	0	0	0	0	0.0154503	0	0	0	0	0	0	0	0	0	0	22.5366	76.2246
NPC85	SRR5908805	95.83		0.1127	0	0	0.186616	0.00654844	0	0	0	0.0327936	0.0421066	0.0234766	0	0	0	0	0	0	0.0353588	0	0	0	0	0	0	0	0.0575128	0	0.0249325	0.0664383	0	0	0	0	0.0095745	0	0.0109283	0	0.0189881	0	0.0098636	0	0	0	0	16.1541	60.1747
NPC86	SRR5908851	95.16		0.287412	0	0	0.375722	0.0167001	0.0182274	0	0	0	0.0536909	0.0598709	0.0205849	0.0150141	0.0241244	0	0.0413081	0	0.0225433	0	0	0	0	0	0	0	0.0916696	0.0969364	0.0635838	0.0282389	0	0	0.0240158	0	0.0244172	0	0.0696746	0.0703132	0.012106	0	0	0.0230203	0	0.0263414	0.0650977	16.8781	49.9568
NPC87	SRR5908822	95.03		0.113184	0	0	0.19728	0	0	0	0	0	0	0	0	0	0	0	0	0	0	0	0	0	0	0	0	0	0.0240664	0	0.125197	0.111205	0	0	0	0	0	0	0	0	0	0	0	0	0	0	0.170904	17.3437	77.5883
NPC88	SRR5908752	88.59		0.044099	0	0	1.17219	0.0256237	0	0.0496683	0	0	1.31809	0	0	0	0.0555229	0	0.063381	0	0	0	0	0	0	0	0.0295001	0	0.0281306	0.074367	0.487798	0.0433282	0	0.028063	0.0368485	0	0	0	0	0	0	0	0	0	0	0.0404168	0	19.0134	72.5857
NPC89	SRR5908765	84.21		0.106556	0	0	0.344925	0	0	0	0	0.022147	0	0	0	0.0159039	0.00425904	0	0.0583418	0	0.0477589	0.0136413	0	0	0	0	0	0	0	0	0	0.149563	0	0.0193739	0	0	0.0129322	0	0.0295216	0	0	0	0.0133227	0	0	0	0	20.6891	65.1068
NPC90	SRR5908761	80.72		0.281427	0	0	0.67448	0	0	0	0	0	0.262864	0	0	0.0183768	0.00984253	0	0.0505599	0	0	0	0	0	0	0	0.0235326	0	0	0	0.155649	0.103691	0	0	0.0293946	0	0.014943	0	0.0341119	0.0430306	0	0	0.0153942	0	0	0.0322411	0	12.6226	51.756
NPC91	SRR5908823	78.55		0.0489713	0	0	2.2762	0.0284547	0.0414093	1.21343	0	0.498739	2.19557	6.59678	0	0.0341093	0.0274032	0	0.0469224	0.0666239	0.0768217	0	0	0	0.0664048	0	0.0218396	0.0901207	0.0416514	0.110111	0.180564	0.352846	0.0248711	0	0.0545596	0.0437897	0.0277358	0	0	0.0199674	0.0137514	0.0167574	0	0	0	0.0299215	0	15.5365	45.7052
NPC92	SRR5908755	77.96		1.09742	0	0	0.695568	0.0579686	0.144617	0	0	0.0829421	1.5442	0.0593774	0.0408306	0.119123	0.271157	0	0.559892	0.116338	0.380078	0.0383157	0	0.146267	0.289888	0.116083	0.133476	0	0.309108	0.288412	0.157649	0.252055	0.0217148	0	0.0476357	0.0764651	0.072648	0.0510876	0.0829205	0	0	0.0146308	0.0748416	0.0228306	0.053088	0	0.0645612	9.9837	29.4857
NPC93	SRR5908772	72.49		0.027858	0	0	0.437012	0.0161869	0	0	0	0	0.0520409	0	0	0	0.0116915	0	0	0	0	0	0	0.0714753	0	0	0	0	0.0177705	0	0.0616299	0.0273711	0	0	0	0.0373656	0	0	0	0	0	0	0	0.0223129	0	0	0	5.515	43.4944
NPC94	SRR5908857	67.67		0.06461	0	0	0.309694	0	0	0.0363848	0	0	0.241393	0.0336472	0	0.0168757	0.00451929	0	0	0	0	0	0	0	0	0.0657802	0	0	0.0206072	0	0.0357339	0.0317403	0.0246102	0	0	0	0	0	0	0	0	0	0	0	0	0	0	5.31922	29.1404
NPC95	SRR5908751	67.63		0.187255	0	0.0845564	0.401707	0	0	0	0	0	0	0	0	0	0.00403014	0	0	0	0	0	0	0	0	0	0	0	0	0	0	0.0566098	0	0	0	0	0	0	0	0	0	0	0	0	0	0	0	12.8869	47.8656
NPC96	SRR5908793	66.25		0.30294	0	0	0.410688	0	0	0	0	0.024486	0.440156	0	0.0241078	0.0175836	0.00941769	0	0.0322517	0	0.396021	0.0150819	0	0	0	0	0.0225169	0	0.0858862	0	0.0744654	0.0992149	0	0.04284	0.0281258	0.0451477	0.0428939	0	0.0326395	0.0205866	0.0141779	0	0.0147297	0	0	0	0	13.3913	44.651
NPC97	SRR5908852	64.41		0.259648	0	0	2.67969	0.0238213	0	0	0	0	2.55286	0	0	0.0142776	0.0764702	0	0	0	0	0.0122463	0	0	0	0.0556529	0.0182834	0.150892	0.0174346	0.0921814	0.12093	0.402805	0.0208213	0.0347854	0.0228377	0.0733185	0.0232195	0	0	0.0334321	0	0	0	0	0	0	0	2.1591	9.34598
NPC98	SRR5908816	56.03		0.396798	0	0	0.199507	0	0	0	0	0	0	0.0317911	0	0	0	0	0	0	0	0	0	0	0	0	0.0204183	0	0.0194704	0	0.0337627	0	0	0	0	0	0	0	0	0	0	0	0	0	0	0	0	8.8605	35.6309
NPC99	SRR5908831	53.07		0.181844	0	0	0.0158478	0	0	0	0	0	0.135879	0.0378799	0	0	0	0	0	0	0.0285261	0	0	0	0	0	0	0	0	0	0	0	0	0	0	0	0	0	0	0	0	0	0	0	0	0	0	10.7306	37.5819
NPC100	SRR5908801	52.24		0.574983	0	0	0.769548	0.0477276	0.0520925	0	0	0.298766	0.230167	0.0427767	0	0.214546	0.0402184	0	0.196759	0.335249	0.644273	0	0	0	0.0835364	0.0836281	0.0274739	0	0.235786	0.138519	0.181718	0.403523	0.0312876	0.0522712	0.171588	0.0550869	0.139565	0	0.039825	0	0	0.0421612	0.0898623	0	0	0.0752819	0	8.44331	27.0313
NPC101	SRR5908847	41.74		0.239711	0	0	0.803498	0	0	0	0	0	0.137784	0	0.0264131	0.0192649	0.0257956	0	0.0176678	0	0	0	0	0	0	0	0	0	0.0235247	0	0.040793	0.144936	0	0	0	0	0	0	0	0	0	0	0.0161382	0	0	0	0	8.66969	34.3334
NPC102	SRR5908817	39.34		0.0745712	0	0	0.270789	0	0.0157641	0	0	0.542469	0.139305	0.440128	0.23144	0.688207	0.441626	0	1.73865	0.304356	7.2333	0.0668259	0	0.0637758	0.252795	0.151844	0.133025	0	0.887948	0.20959	0.0824864	2.0515	0.0568089	0.0316363	0.415404	0.133362	0.960842	0.0445506	0.530276	0.0608109	0.04188	0	1.20741	0.0398185	0.0925901	0.273379	0.0563002	1.56144	5.1026
NPC103	SRR5908824	27.54		0.0653597	0	0	0.0854421	0	0	0	0	0	0	0	0	0	0	0	0	0	0	0	0	0	0	0	0	0	0.0208463	0.0551101	0	0.0642173	0	0	0	0	0	0	0	0	0	0	0	0	0	0	0	5.19432	22.1571
NPC104	SRR5908812	21.04		0	0	0	0.266316	0	0.0387592	0	0	0.355672	0	0.0636555	0	0.0798159	0	0	0.175677	0	0.623178	0	0	0	0.497239	0.186669	0.0817674	0	0.116957	0.206128	0	0.240192	0	0	0.0766017	0	0.207686	0	0.162974	0	0	0	0.0534893	0.0244755	0	0.0280066	0	2.23949	11.8579
NPC105	SRR5908792	15.53		0.111071	0	0	0.129066	0.0215126	0.02348	0	0	0.026933	0	0.0771242	0.026517	0.0580224	0	0	0.0532121	0	0.203279	0.0165892	0	0	0	0	0	0	0.0236173	0	0	0.291013	0	0	0	0	0.0157268	0	0.0179506	0.022644	0.0311894	0	0.0162017	0.0296542	0	0.0339324	0	4.1581	10.6561
NPC106	SRR5908835	14.4		0.0150297	0	0	0.916892	0	0	0	0	0.0874669	0.112306	0	0	0.047108	0.0462565	0	0.0432026	0	0.141463	0	0	0	0	0.122415	0	0	0.0191747	0	0.0997498	0.177204	0	0.0191287	0.0502343	0	0.0127685	0	0.014574	0.036769	0.0126612	0	0.0131541	0.024076	0	0.0275495	0	1.88823	7.29828
[truncated: 14 more columns]

## Sheet: GAC_EBV
Designation	Sample ID	ppm	Geneid	BNRF1	oriP	BCRF1	EBNA1	EBNA-3B/EBNA-3C	EBNA-3A	EBNA2	EBNA-LP	BHLF1	oriLyt-1	BHRF1	BFLF1/2	BFRF1/2/3	BOLF1/BPLF1	EBNA-1.2	BORF1/2	BaRF1	BMRF1/2	BSLF1	BSLF2/BMLF1	BSRF1	BLLF3	BLRF1/2	BLLF1/2	BZLF2	BRLF1/BZLF1	BRRF1	BRRF2	BKRF2/3/4	BBLF4	BBRF1/2	BBLF2/BBLF3	BBRF3	BGLF3/3.5/4/5	BGRF1/BDRF1	BDLF3.5/4/BGLF1/2	BDLF1/2/3	BcLF1	BcRF1/BTRF1	BXLF1/2	BXRF1/BVRF1	BVLF1	BVRF2/BdRF1	BILF2	RPMS1	RPMS1/BAREs
GAC1	TCGA-BR-8686-01A	330.99		0.286327	0	0	1.06944	0.0594178	0	0.0460696	0	0.178533	0.53488	0	0.234368	0	0.0572221	0	0.0391924	0	0.0962493	0.0183277	0	0	0.166396	0	0	0	0.156554	0.0689787	0	0	0	0	0.0683573	0	0.03475	0	0.0793273	0	0	0	0	0	0	0	0.277936	79.4193	280.268
GAC2	TCGA-HU-A4G6-01A	226.79		0.339411	0	0	0.46299	0.0171491	0.0842285	0	0	0.8588	0.744315	0.138331	0.0528461	0.262102	0.0743193	0	0.247443	0	0.544013	0.0396728	0	0	0.0900469	0.120194	0.148076	0	0.131788	0.423057	0.0652934	0.347978	0.05621	0.0469541	0.0246615	0.0593802	0.0564159	0	0.071548	0.0902548	0.0808051	0.0378725	0.0516617	0.141836	0.0274842	0.270497	0	46.0966	140.351
GAC3	TCGA-BR-A4J4-01A	211.46		0.595416	0	0.053773	0.239496	0	0.0116186	0	0	0	0.513361	0	0	0	0	0	0	0	0.0431093	0	0	0	0	0	0	0.0505722	0.0350597	0	0	0.0360005	0	0	0	0	0	0	0	0	0	0	0.0080171	0	0.034121	0	0.0829902	40.628	141.574
GAC4	TCGA-HU-A4H0-01A	203.69		0.235132	0	0	0.531272	0.0303608	0.0220916	0	0	0	0.68327	0	0.0124745	0.0181971	0.00487314	0	0.0250327	0	0.0409838	0.0234123	0	0	0	0	0.0349538	0	0.166655	0.0293718	0.0577977	0.171128	0	0.0110837	0	0	0	0	0	0.0213049	0.00733627	0.0178799	0.0152437	0	0	0.0478887	0.0394492	29.4908	143.967
GAC5	TCGA-D7-A4YX-01A	193.21		0.0288677	0	0	0.612186	0.0279559	0	0.0650268	0	0	1.00664	0	0	0	0.0215383	0	0.00921996	0	0	0	0	0	0	0	0.0257481	0	0.0736582	0.0324543	0.0425757	0.170179	0	0	0.0160809	0	0	0	0	0	0	0.00987817	0.00842172	0	0	0	0	41.1215	134.341
GAC6	TCGA-VQ-A923-01A	190.38		0.0610796	0	0	0.310515	0	0	0	0	0	0.380338	0	0	0	0.00854469	0	0	0.0415484	0	0	0	0	0	0	0	0	0.0389624	0	0.0225209	0.060012	0	0	0	0.0273084	0	0	0	0	0	0	0	0	0	0	0.0461142	28.2142	142.799
GAC7	TCGA-BR-8589-01A	189.52		0.548662	0	0	1.04887	0.0205677	0.0448974	0.0398679	0	0	0.529002	0	0	0	0.0148557	0	0	0	0	0	0	0	0	0	0	0	0	0.0596931	0	0.0695576	0	0	0	0	0	0	0.0514865	0.0216493	0	0	0	0	0	0.0324419	0	50.367	134.854
GAC8	TCGA-BR-4253-01A	184.38		0.134328	0	0.14337	0.319274	0.0283822	0.0154889	0	0	0	0.182498	0.025438	0	0.0382751	0.00683333	0	0.0117007	0	0.229877	0.0218865	0	0	0	0	0.0326758	0	0.685495	0.0823727	0.0270155	0.167974	0	0	0	0	0.0103744	0	0.0355241	0	0	0.012536	0.0106877	0	0	0	0.165952	48.0712	110.075
GAC9	TCGA-VQ-A8PF-01A	117.78		0.108596	0.0224053	0	0.967454	0.0630998	0.0459136	0	0	0	0.180325	0	0.0172841	0	0.01688	0	0.0115614	0.0492473	0.0189285	0.010813	0	0	0	0	0.0645738	0	0.169334	0.203481	0.160164	0.308239	0	0	0.0201648	0	0.0205019	0	0	0.0147596	0	0.0247735	0.0105605	0	0	0.0221175	0.0546591	24.117	103.488
GAC10	TCGA-VQ-AA69-01A	108.81		0.179894	0	0	1.19824	0.0298649	0.0162981	0	0	0.0560846	0.432072	0.0267669	0.0368123	0.0268498	0.0323565	0	0.0738717	0.0524443	0.645032	0.0230299	0	0.0659362	0	0	0.0171915	0	0.0983602	0	0.0852807	0.302999	0	0.016354	0.107369	0.0344699	0.0327492	0.0921196	0	0	0.0108247	0.0131909	0.0449841	0	0	0	0.23283	17.6843	95.5504
GAC11	TCGA-CD-5801-01A	107.27		0.33589	0	0	0.178183	0	0	0	0	0	0.381937	0	0	0	0	0	0	0	0.0458186	0	0	0	0	0	0	0	0.037263	0	0	0	0	0	0	0	0	0	0.0708056	0	0	0	0	0	0	0	0.0661544	22.8509	65.0291
GAC12	TCGA-HU-8608-01A	101.98		0.125604	0	0	0.547323	0.00912277	0	0.0353667	0	0	0.703914	0.0327057	0	0	0.00878565	0	0.0300872	0	0.123148	0	0	0	0.0638694	0.0639395	0.0210057	0	0.0600917	0.0529535	0.069468	0.339374	0	0	0	0	0	0.0562791	0.0152245	0	0	0	0.0137412	0	0	0.0287791	0	27.7048	98.6242
GAC13	TCGA-D7-8573-01A	98.93		0.137149	0.117538	0.0619306	0.570047	0.0551701	0.053525	0.095058	0	0.276283	0.394161	0.197788	0.22668	0.121245	0.11807	0	0.151628	0.258351	0.562691	0.0472707	0	0.108271	0.0429168	0	0.112918	0.116489	0.215352	0.0711639	0.0933575	0.331696	0.0482219	0.107417	0.176307	0.0566018	0.0806644	0	0.11253	0.103238	0.0355496	0.0866412	0.0738668	0.0337998	0	0.174042	0.14337	18.9375	70.8843
GAC14	TCGA-D7-5577-01A	91.55		0.045287	0.056061	0	0.236807	0	0	0	0	0.636919	0.563997	0	0	0.0946295	0.0042236	0	0.216961	0.123223	0.615699	0.0135278	0	0	0.184227	0.0614763	0.161572	0	0.462214	0.101827	0.100188	0.622936	0.0459999	0	0.0252274	0.0809905	0.0769474	0.054111	0.0878279	0.240047	0.0508673	0	0.0396355	0	0	0.66409	0	16.5515	54.1602
GAC15	TCGA-BR-8381-01A	91.5		0.187009	0.0315681	0.698595	1.83722	0.227201	0.280325	0.306366	0	0.148407	1.14332	0.177072	0.365288	0.532862	0.280642	0	0.537555	0.277549	0.506718	0.0609402	0	0.43619	0.138318	0	0.159218	0	0.520548	0.458714	0.112832	0.968814	0.543957	0.238012	0.170468	0.22803	0.0866587	0.426581	0.148369	0.0831825	0.143218	0.279239	0.371981	0	0	0.218138	0.308049	24.4008	67.5562
GAC16	TCGA-BR-6455-01A	90.61		0.175248	0	0	1.47639	0.0203656	0.0296374	0.10527	0	0	0.174601	0	0	0	0.0294195	0	0.0335832	0.047684	0.109966	0.0732882	0	0.0599512	0.0475271	0	0.031262	0	0.119243	0.0788086	0	0.183664	0	0.0297391	0.0390493	0	0.019851	0.041879	0	0.014291	0.00984213	0.0119936	0.0102252	0	0	0	0	26.0869	70.108
GAC17	TCGA-BR-8366-01A	88.42		0.179448	0	0	0.244359	0.026067	0.0426764	0.227374	0	0.620063	0.125709	0.093452	0.160655	0.281225	0.0721734	0	0.300895	0.1831	2.16405	0.120607	0	0.0575512	0.364996	0.0913491	0.0600209	0	0.815592	0.340442	0.0744356	0.176312	0.0341762	0.0570971	0.0374861	0.0601728	0.0952817	0	0	0.0960325	0.0566887	0.0115134	0.0981588	0.0179661	0	0.10279	0	16.6737	59.5469
GAC18	TCGA-BR-6707-01A	83.63		0.0372039	0	0	1.05376	0.0648519	0.0471885	0.0838047	0	0.027064	0.764497	0	0	0.0194349	0.0364323	0	0.0178237	0.151844	0.320992	0.100019	0	0	0.227017	0.151511	0.0995502	0	0.0711966	0	0	0.51175	0	0.0473504	0	0	0	0	0	0.0455082	0	0.0190961	0	0	0	0	0	23.8306	59.063
GAC19	TCGA-VQ-A91W-01A	82.2951		0.34473	0	0	0.326003	0.0298327	0.0186063	0	0	0.298795	0.219228	0.0152789	0.0420257	0.0536417	0.0328346	0	0.203806	0.0898074	0.391203	0.0197186	0	0.0376371	0	0.0597402	0.0588784	0	0.11229	0.148427	0.0162264	0.158542	0	0.0186701	0.0367725	0	0.0436184	0.0262914	0.0284492	0.0358874	0.0247154	0.015059	0.0513548	0.0234988	0	0.0672224	0.166127	14.8833	54.3525
GAC20	TCGA-HU-A4G2-01A	79.52		0.0989583	0	0	0.177876	0	0	0	0	0.0629889	0	0	0	0.0258473	0.00692186	0	0.00592612	0	0.145535	0	0	0	0.0503201	0	0	0	0.0552344	0	0.054731	0	0	0	0	0	0	0	0.0239895	0.0226963	0	0	0.0216522	0	0	0.0113369	0	8.79458	40.4886
GAC21	TCGA-B7-5818-01A	72.74		0.017022	0	0	0.356034	0.0197812	0	0	0	0	0.57237	0	0	0	0.0238128	0	0.0489293	0	0.186918	0.015254	0	0	0	0	0	0	0	0.114821	0	0.30104	0	0.0216643	0	0	0	0	0	0	0	0	0	0.0272675	0	0	0.154216	21.7741	55.7616
GAC22	TCGA-BR-7196-01A	66.79		0.313487	0	0	0.577934	0.0140116	0	0	0	0.070168	0.18019	0.100465	0.0345422	0.0755823	0.0236142	0	0.0231054	0	0.35937	0	0	0.18561	0.147145	0.0491022	0.0483939	0	0.230737	0.0406656	0	0.450164	0	0.0153455	0	0	0.0409729	0	0.0116916	0.029497	0.0101572	0	0.0633151	0.0193144	0	0.0884034	0	12.1412	46.7742
GAC23	TCGA-FP-7998-01A	64.38		0.0261764	0	0	2.38395	0.0228147	0.0498023	0	0	0.933061	0.782393	0.463489	0.431203	0.328182	0.0952103	0	0.0501624	0.0534183	0.0615948	0	0	0	0	0	0	0	0.233769	0	0.0868645	0.102876	0.0199414	0.0166577	0	0	0.0222383	0.140746	0	0	0	0	0.0114549	0.062898	0	0	0	14.9733	52.0366
GAC24	TCGA-FP-7916-01A	50.97		0.0626463	0	0	0.229306	0.0218403	0.0158918	0	0	0	0.514923	0	0.0358946	0	0.00350554	0	0.012005	0	0.0196548	0	0	0	0	0	0	0	0.0159847	0	0.0277183	0.049241	0.0190897	0	0	0	0	0	0	0	0	0	0	0.0200706	0	0.0229662	0	11.9727	41.0172
GAC25	TCGA-BR-6706-01A	50.12		0.0810022	0.0300819	0	0.705939	0.150612	0.143838	0.0729856	0	1.67347	1.15002	0.168736	0.0696181	0.186184	0.267429	0	0.527769	0.330603	1.21986	0.232285	0	0.166262	0.197709	0.329877	0.628563	0.0894399	1.05409	0.163919	0.14336	1.30522	0.0987329	0.144331	0.21659	0.130377	0.178921	0.290356	0.282767	0.535047	0.0955326	0.0997847	0.0992511	0.103806	0	0.534518	0.146773	16.0975	42.5119
GAC26	TCGA-D7-A6EZ-01A	48.25		0.032283	0.0199817	0	0.422023	0.0250107	0.013649	0	0	0.0939373	0.201024	0.0224163	0.200387	0.0786999	0.0391405	0	0.0618647	0	0.388261	0.02893	0	0	0.306429	0	0.0719858	0	0.0549152	0	0.0238064	0.338333	0	0	0.107901	0.0577344	0	0	0.0521737	0.039489	0.072522	0.0110469	0.0565086	0	0	0.138075	0	8.25506	30.972
GAC27	TCGA-CG-5722-01A	32.15		0.259284	0	0	0.361547	0.0200875	0	0	0	0	0.581234	0	0	0	0	0	0	0	0.0813482	0	0	0.0886991	0	0	0	0	0.308739	0.116599	0.0382406	0.0679338	0	0.0659994	0.0288871	0.0463698	0	0	0	0	0	0	0	0	0	0	0	7.23883	18.8812
GAC28	TCGA-BR-7958-01A	31.15		0	0	0	0.242216	0	0.0320471	0	0	0	0.188797	0	0.108577	0	0	0	0.0726274	0	0.158542	0.022642	0	0	0	0	0	0	0.483516	0.0852161	0	0.0496492	0.038496	0	0	0	0	0	0.0245002	0	0	0	0.0442263	0	0	0.0463131	0	5.33858	21.5859
GAC29	TCGA-D7-8570-01A	21.99		0.0385458	0.0536805	0	0.453504	0.022397	0.0244453	0.0434137	0	0	0.360032	0.0401473	0.0552142	0.0302038	0.0539234	0	0.0646328	0.0786605	0	0.00863555	0	0	0	0.117732	0.0128926	0.0532012	0.0983527	0.0650022	0.0639556	0.113616	0.0293644	0.0490582	0.0322083	0	0.02456	0	0.0467214	0.0471496	0	0.0494621	0.0506032	0.0463098	0	0.0529909	0	2.67813	12.0238
GAC30	TCGA-B7-A5TK-01A	15.312		0.0097037	0	0	0.211421	0.03383	0	0	0	0	0	0.0606413	0	0	0	0	0	0	0.0304446	0	0	0	0	0	0	0	0.482816	0	0	0.0190682	0	0	0	0	0	0	0	0	0	0	0	0	0	0	0	1.25605	10.0586
[truncated: 14 more columns]

## Sheet: eBL_EBV
Designation	Sample ID	ppm	Geneid	BNRF1	oriP	BCRF1	EBNA1	EBNA-3B/EBNA-3C	EBNA-3A	EBNA2	EBNA-LP	BHLF1	oriLyt-1	BHRF1	BFLF1/2	BFRF1/2/3	BOLF1/BPLF1	EBNA-1.2	BORF1/2	BaRF1	BMRF1/2	BSLF1	BSLF2/BMLF1	BSRF1	BLLF3	BLRF1/2	BLLF1/2	BZLF2	BRLF1/BZLF1	BRRF1	BRRF2	BKRF2/3/4	BBLF4	BBRF1/2	BBLF2/BBLF3	BBRF3	BGLF3/3.5/4/5	BGRF1/BDRF1	BDLF3.5/4/BGLF1/2	BDLF1/2/3	BcLF1	BcRF1/BTRF1	BXLF1/2	BXRF1/BVRF1	BVLF1	BVRF2/BdRF1	BILF2	RPMS1	RPMS1/BAREs
eBL1	SRR5227642	469.58		0.487785	0	0	20.2351	1.07702	0.742434	23.294	0	1.13549	127.935	327.186	0.419231	1.01925	0	0	0.654327	0.79634	1.37735	0	0	0.500604	0.39686	0	0	0	0.622312	1.64517	2.15824	2.49215	0.148639	0.37249	0.652138	0.785112	0.745919	0.349697	0.189198	0	0	1.70252	0.170765	0.46883	0	0.715289	0	72.4244	147.452
eBL2	SRR5227624	391.95		0.992156	0	0	0.314425	0	0	0	0	0	1.34794	0	0	0	0	0	0.0864223	0	0.141491	0	0	0	0	0	0	0	0.115071	0.304207	0.199539	0.177239	0	0	0	0	0	0	0	0	0	0.185184	0	0	0	0	0	150.574	333.854
eBL3	SRR5227631	339.44		0.369521	0	0.072306	0.697752	0.028628	0.015623	0.0554917	0	0.268808	0.276117	0.667115	0.37052	0.476149	0.00689252	0	0.436675	0.351905	3.03361	0.0993422	0	0.189616	0.0501068	0.200647	0.0823971	0	1.49287	0.373888	0.245245	1.67009	0.112601	0.0313533	0.411688	0.231296	0.49182	0.0441521	0.119439	0.0301335	0.031129	0.0379337	0.172484	0.0591935	0.0458809	0.158044	0	60.8205	146.269
eBL4	SRR5227640	240.71		1.8459	0	0	1.02372	0.0487526	0	0	0	0	0.940439	0.174781	0.120187	0.0876614	0	0	0	0	0	0	0	0.430547	0	0	0	0	0.107045	0.282987	0	0.659503	0	0	0	0	0	0	0	0	0	0	0	0.134407	0	0	0	70.1151	165.131
eBL5	SRR5227621	173.8		1.80656	0	0	5.90409	0.262425	0.859273	0	0	12.9775	0	10.1137	2.2643	8.61148	0.0315909	6.54524	7.46482	0	23.2031	0.607095	0	0	3.21521	3.67856	2.56806	0	3.16909	3.42733	0.499577	7.76554	0.516093	0.143703	3.77383	1.51445	3.16546	1.61892	1.20435	2.34791	0.380468	0.695455	1.58111	0.18087	0.420578	2.48357	0	17.4092	38.1254
eBL6	SRR5227635	135.4		0.447243	0	0	0.77955	0.129935	0	0	0	0	0	0	0	0	0	0	0.107133	0	0.350797	0	0	0	0	0	0	0	0	0.377107	0.247357	1.31828	0	0	0	0	0	0	0	0.136768	0	0.229562	0	0	0	0	0	48.9523	108.469
eBL7	SRR5227637	90.46		0	0	0	3.19916	0.0592484	0	0	0	1.33518	0	0	0.146062	0.106534	0	0	0.293105	0	0.319916	0	0	0	0	0.415259	0.136423	0	0	1.03173	0.225582	1.4026	0	0	0	0	0.259882	0	0	0.124728	0	0	0	0.163342	0	0.186908	0	26.0094	58.6962
eBL8	SRR5227620	74.99		0	0.155116	0	1.09204	0	0	0	0	0	0	0	0	0	0	0	0.0800417	0	0	0	0	0.42866	0	0	0	0	0	0	0	0.49246	0	0	0	0	0	0	0	0	0	0	0	0	0	0	0	20.354	40.117
eBL9	SRR5227625	73.21		0	0	0	0.862621	0.127806	0.418482	0	0	0	0.821792	0	0	0	0	0	0.105377	0	0	0	0	0	0	0	0	0	0	0	0	0	0	0	0	0	0	0	0	0	0	0	0	0	0	0	0	27.0059	53.1687
eBL10	SRR5227638	60.45		0.0854282	0	0	1.11677	0	0	0	0	0	0	0	0	0	0	0	0	0	0	0	0	0	0	0	0	0	0	0	0	0.16787	0	0	0	0	0	0	0	0	0	0	0	0	0	0	0	13.6598	41.3916
eBL11	SRR5227639	48.67		0	0	0	0.829615	0	0	0	0	0	0	0	0	0.117007	0	0	0	0	0	0	0	0	0	0	0	0	0.0714393	0	0	0	0	0.142535	0	0	0	0	0	0	0	0	0	0	0	0	0	8.74044	17.4672
eBL12	SRR5227627	45.76		0.386972	0	0	0.819033	0	0	0	0	0	0.206541	0	0	0	0	0	0.0529689	0	0.0867211	0	0	0	0	0	0	0	0	0	0	0.651786	0.0842281	0	0	0.148297	0	0	0	0	0	0	0.145149	0	0	0	0	7.26095	23.0518
eBL13	SRR5227630	41.93		0.053545	0	0	1.21328	0.295567	0.101873	0.0603072	0	0.0779027	1.10029	5.24236	0	0	0	0	0.102609	0	0.25199	0	0	0.274761	0	0.763207	0	0	0	0.361185	0.296142	0.420873	0	0.102222	0.0447414	0.287277	0	0.191934	0	0	0	0.137418	0	0	0	0.24537	0	15.4416	29.617
eBL14	SRR5227636	35.2		0.273327	0	0	2.30266	0.158816	0.11556	0	0	0.132555	0.680794	0.379578	0	0	0	0	0	0	0.428771	0	0	0	0	0.371036	0	0	0	0.614571	0	1.79033	0	0.115957	0	0.244406	0.0774019	0	0	0	0.0767516	0	0	0	0	0	0	5.37631	15.7239
eBL15	SRR5227633	28.17		0	0	0	0.568351	0	0	0	0	0	0	0	0	0	0	0	0	0	0	0	0	0	0	0	0	0	0	0	0.11098	0.197154	0	0	0	0	0	0	0	0	0	0	0	0	0	0	0	4.96556	10.486
eBL16	SRR5227632	18.32		0.0625096	0	0	0.599253	0.0726424	0	0	0	0	0	0	0	0	0	0	0	0	0	0	0	0	0	0	0	0	0	0	0	0	0	0	0	0	0	0	0	0	0	0	0	0	0	0	0	2.49878	7.43776
[truncated: 18 more columns]

## Sheet: sBL_EBV
Designation	Sample ID	ppm	Geneid	BNRF1	oriP	BCRF1	EBNA1	EBNA-3B/EBNA-3C	EBNA-3A	EBNA2	EBNA-LP	BHLF1	oriLyt-1	BHRF1	BFLF1/2	BFRF1/2/3	BOLF1/BPLF1	EBNA-1.2	BORF1/2	BaRF1	BMRF1/2	BSLF1	BSLF2/BMLF1	BSRF1	BLLF3	BLRF1/2	BLLF1/2	BZLF2	BRLF1/BZLF1	BRRF1	BRRF2	BKRF2/3/4	BBLF4	BBRF1/2	BBLF2/BBLF3	BBRF3	BGLF3/3.5/4/5	BGRF1/BDRF1	BDLF3.5/4/BGLF1/2	BDLF1/2/3	BcLF1	BcRF1/BTRF1	BXLF1/2	BXRF1/BVRF1	BVLF1	BVRF2/BdRF1	BILF2	RPMS1	RPMS1/BAREs
sBL1	SRR387432	502.04		0.447029	0.0193039	0	3.19825	0.0664466	0.0923024	0.163925	0	0.952886	0.155364	0.757958	0.119133	0.21723	0.113439	0	0.936339	0.0848607	1.94069	0.0372649	0	0	0.54978	0.423372	0.250359	0.0573947	0.862104	0.806447	0.988954	1.87943	0.0791976	0.0396939	0.364844	0.306769	0.326783	0.14906	0.0302425	0.101732	0.0175155	0.117394	0.0909866	0.0166534	0	0.171503	0.0470931	81.8878	411.702
sBL2	SRR387437	246.67		0.160092	0	0	3.27241	0.0084565	0.0184597	0	0	0	0	0	0	0	0.028504	0	0.0139449	0	0.0228308	0	0	0	0	0	0.0389432	0	0.055703	0.147258	0.386367	0.343187	0	0	0	0	0.0370928	0	0	0	0	0	0	0	0	0	0	27.6761	216.712
sBL3	SRR387427	234.37		0.238346	0	0	5.59546	0	0	0.369114	0	0.0433463	0	0.341343	0.0426768	0.0466909	0.0916941	0	0.157007	0	0.444002	0	0	0	0.242397	0.363995	0.119581	0	0.22806	0.0502423	0.757978	0.497633	0.226967	0	0.149369	0.0799226	0.0632774	0	0	0	0.0125492	0	0.0260753	0	0	0.136528	0	2.6655	206.359
sBL4	SRR387430	149.41		0.597796	0	0.0762873	7.10122	0.105715	0.115383	0.40983	0	1.00209	0.0485535	1.59719	0.204768	0.325859	0.258157	0	0.498074	0.10608	0.733906	0.0465832	0	0.200056	0.158597	0.264619	0.660698	0	0.46423	0.394475	1.06375	1.09808	0.079201	0.0826991	0.108589	0.0697232	0.0883235	0.465832	0.0504063	0.222549	0.218954	0.0533631	0.125112	0	0.0484072	0.166747	0.0588688	15.1147	117.1
[truncated: 14 more columns]

## Sheet: ECL_EBV
Designation	Name	Sample ID	ppm	Geneid	BNRF1	oriP	BCRF1	EBNA1	EBNA-3B/EBNA-3C	EBNA-3A	EBNA2	EBNA-LP	BHLF1	oriLyt-1	BHRF1	BFLF1/2	BFRF1/2/3	BOLF1/BPLF1	EBNA-1.2	BORF1/2	BaRF1	BMRF1/2	BSLF1	BSLF2/BMLF1	BSRF1	BLLF3	BLRF1/2	BLLF1/2	BZLF2	BRLF1/BZLF1	BRRF1	BRRF2	BKRF2/3/4	BBLF4	BBRF1/2	BBLF2/BBLF3	BBRF3	BGLF3/3.5/4/5	BGRF1/BDRF1	BDLF3.5/4/BGLF1/2	BDLF1/2/3	BcLF1	BcRF1/BTRF1	BXLF1/2	BXRF1/BVRF1	BVLF1	BVRF2/BdRF1	BILF2	RPMS1
ECL1	Daudi	SRR387401	285.55		4.46677	0.051304	0.432512	10.627	3.15195	3.14233	0	12.655	0	29.1447	87.8097	2.95511	12.6243	1.4662	0	9.80402	1.57874	14.0719	0.899604	0	1.70133	1.76087	10.0518	12.5806	0.915227	4.46493	2.23648	3.54521	18.6587	1.75403	2.44981	6.31039	8.27652	4.92145	2.74008	5.67093	12.3471	9.50417	1.36144	4.10279	2.02119	0.789031	13.8767	10.5134	7.92414
ECL2	C666-1	SRR8133536	261.391		0.554406	0	0	1.80951	0.252657	0.261975	0.0244871	0	1.48669	0.121844	0.769922	0.311431	0.556515	0.234196	0	1.1145	0.532413	4.77484	0.233799	0	0.334691	0.353775	0.0442704	0.130895	0.120031	0.6657	0.733279	0.336687	1.66619	0.198753	0.0553418	0.163501	0.174969	0.701879	0	0.305692	0.0531887	0.0366306	0.0334784	0.637445	0.0870689	0.0809846	0.0996302	0.246217	52.8495
ECL3	Raji	SRR387394	191.91		0.148374	0	0	20.4308	0.431063	1.50555	20.7219	0	17.1976	2.40217	21.7384	0.920987	2.11857	0.525836	0	1.32688	0.807432	5.66372	0.797778	0	1.26894	1.40836	1.00707	0.330849	0	1.13576	1.00085	1.4224	4.66497	0.452129	0.692411	1.81836	1.32675	2.22691	1.59556	1.48671	0.0604975	0.0833283	0.0507717	0.865718	0.316907	0.552678	0.453283	0	0.18829
ECL4	Namalwa	SRR387396	189.58		0.137717	0	0	25.2344	7.02176	6.20101	83.9914	0	11.9217	25.4692	94.5978	0.0986348	0.215824	0.183025	0	0.791728	1.68623	1.18821	0.215972	0	0	0.840343	0.280422	0.737004	0.190077	0.307471	0.5806	1.14251	1.21778	0.15737	0.131457	0.345222	0.73887	0.204746	0.246825	0.100156	0.126342	0.116015	0.318093	0.572519	0.110304	0	0.252435	0	0.917521
ECL5	BL58	SRR387403	151.55		0.161761	0	0	26.6514	0.498152	2.23639	44.3814	3.33407	14.615	4.62338	26.9403	1.29758	0.574613	0.178773	0	1.73592	0.924297	8.98296	0.514607	0	1.20359	1.01996	0.658763	0.605976	0	2.4352	2.7006	1.64616	6.00768	1.17069	1.1735	2.7033	2.47343	3.92347	8.11774	3.19987	0	0.0340675	0.0581202	0.920232	0.0518249	0.0903814	0.0889525	0.183191	0.153959
ECL6	BL41	SRR387393	134.83		0	0	0	5.04923	1.31429	1.25832	0	10.9054	3.29087	59.7491	182.685	0	0	0.0777195	0	0.15209	0	0.498006	0.142244	0	0	0.161429	0	0.637099	0	0.202508	0	0.351158	0.545848	0.120922	0.303032	0.19895	0	0	0	0	0	0	0	0.243114	0	0	0.363693	0	0.226613
[truncated: 15 more columns]

## Sheet: LCL_EBV
Designation	Sample ID	ppm	Geneid	BNRF1	oriP	BCRF1	EBNA1	EBNA-3B/EBNA-3C	EBNA-3A	EBNA2	EBNA-LP	BHLF1	oriLyt-1	BHRF1	BFLF1/2	BFRF1/2/3	BOLF1/BPLF1	EBNA-1.2	BORF1/2	BaRF1	BMRF1/2	BSLF1	BSLF2/BMLF1	BSRF1	BLLF3	BLRF1/2	BLLF1/2	BZLF2	BRLF1/BZLF1	BRRF1	BRRF2	BKRF2/3/4	BBLF4	BBRF1/2	BBLF2/BBLF3	BBRF3	BGLF3/3.5/4/5	BGRF1/BDRF1	BDLF3.5/4/BGLF1/2	BDLF1/2/3	BcLF1	BcRF1/BTRF1	BXLF1/2	BXRF1/BVRF1	BVLF1	BVRF2/BdRF1	BILF2	RPMS1	RPMS1/BAREs
LCL1	ERR188073	16945.9		147.711	1.95633	22.9719	47.3526	87.5764	42.3424	72.2148	0	5090.75	9.55961	1005.74	466.636	647.177	40.932	0	673.879	210.58	1985.94	53.6813	0	113.223	359.405	894.41	426.095	50.6875	278.659	95.0284	209.373	1333.22	53.4315	46.2423	495.964	437.025	335.701	70.9996	229.867	662.597	213.138	41.7791	160.839	29.0287	23.2103	679.121	479.441	6.81876	212.096
LCL2	ERR188063	13013.2		131.703	3.63334	25.4616	34.9158	122.8	67.0721	88.7777	0	4468.17	14.3775	738.442	386.445	607.694	44.0939	0	552.393	108.479	1214.71	52.2538	0	108.021	239.327	800.781	558.026	68.5072	164.177	88.3229	186.86	1140.08	43.6758	50.3677	339.481	476.7	215.134	56.053	188.98	654.477	205.387	34.6332	136.061	35.4194	25.9352	658.811	381.954	9.00133	198.737
LCL3	ERR188060	9718.87		59.2165	0.796787	12.9546	99.7425	59.0915	38.5652	167.221	0	3621.6	10.0773	434.037	217.415	269.311	17.7859	0	341.139	55.7931	992.115	28.6205	0	83.358	196.753	404.923	244.403	27.4129	197.003	73.81	107.136	739.856	55.0118	26.2144	326.284	206.212	199.199	45.4851	91.7193	289.962	83.7096	24.6682	69.4241	16.399	21.6922	295.069	182.996	6.88462	166.314
LCL4	ERR188049	9118.86		31.6655	0.323364	7.6671	28.1532	28.2818	16.9343	70.1523	0	2227.08	7.04855	563.31	269.782	227.793	12.3191	0	331.689	25.5874	721.935	14.6174	0	47.3614	276.639	709.672	233.766	12.1781	175.147	36.2197	113.01	590.815	35.7312	21.6838	320.47	231.322	112.834	39.1186	65.4918	261.159	54.4024	33.0132	54.7419	15.9939	16.9737	453.278	196.296	1.54697	140.939
LCL5	ERR188032	6693.57		79.7682	1.19496	11.8729	30.8734	76.8689	27.1306	56.1212	0	1716.03	9.73194	431.978	154.911	189.22	24.1703	0	247.262	52.1557	569.469	23.9467	0	44.1873	117.556	509.43	289.826	62.7674	92.3454	57.8795	96.2687	708.106	28.1078	23.9085	150.258	239.962	131.551	42.8404	94.1688	396.741	130.085	27.4635	65.6297	17.0342	10.5017	369.78	267.502	11.4917	255.93
LCL6	ERR188044	6426.75		61.5041	1.20479	8.56985	87.7881	73.4688	56.5103	111.687	0	864.577	12.3227	368.87	232.585	284.373	41.0121	0	327.085	145.097	1130.3	30.55	0	40.6467	246.128	301.227	263.606	42.0897	164.348	64.1913	92.1052	581.288	33.9822	25.8059	179.951	164.627	202.642	40.0227	120.825	317.134	95.7668	22.7296	102.31	12.9921	8.55965	149.011	182.228	11.1157	154.085
LCL7	ERR188023	6173.76		67.7878	1.54892	15.8424	45.8636	63.5797	34.4482	78.8633	0	1057.99	11.1829	511.172	181.129	195.552	11.7861	0	259.877	47.8639	535.353	25.1738	0	52.6238	131.243	470.295	295.123	31.695	88.1106	50.0619	122.176	701.03	26.129	22.1387	134.318	232.391	136.334	42.8285	100.538	398.328	117.208	26.974	78.5461	15.2096	11.1492	274.369	289.291	8.82662	143.778
LCL8	ERR188066	5350.17		47.5411	0.8947	5.89271	46.454	43.0105	22.2815	85.021	0	1812.53	7.72591	307.931	140.628	213.383	18.7164	0	191.249	51.8683	463.122	23.4606	0	35.439	105.764	259.508	177.413	24.6063	79.8882	41.8464	61.6035	454.517	18.8121	14.3857	120.952	141.212	99.0957	21.5895	60.9148	226.865	73.3168	16.0344	44.8063	11.6421	10.694	190	128.596	4.31846	135.926
LCL9	ERR188028	5111.16		59.3537	1.10951	8.769	59.9722	65.4451	40.6098	100.162	0	1926.23	18.2315	396.228	147.074	203.306	29.9112	0	220.134	49.5874	442.033	34.6264	0	48.2913	77.1748	279.229	211.847	49.7571	80.1698	45.1757	84.4905	428.957	20.939	20.0894	141.296	155.481	107.659	31.4136	66.3418	245.824	93.1637	24.8935	62.6673	15.873	8.90282	211.385	117.517	6.16094	186.975
LCL10	ERR188043	4995.97		57.6788	1.31252	7.05394	57.0642	59.9231	35.6229	87.2013	0	744.867	16.3735	353.875	149.886	168.156	22.1896	0	199.503	55.3908	502.785	21.6	0	35.304	116.839	306.475	259.656	38.8938	107.644	39.7334	72.1931	497.304	22.365	18.3823	123.915	158.014	124.785	42.3977	76.6297	333.428	105.516	23.1474	58.1108	11.8137	9.9174	223.026	163.407	8.07309	157.451
LCL11	ERR188065	4987.26		59.1361	1.0051	4.76628	97.8564	65.2034	40.2926	178.095	0	1729.11	25.6586	292.744	137.724	233.422	38.4487	0	237.799	50.2601	428.864	19.7363	0	32.2894	90.0054	276.512	216.082	34.3664	82.7396	31.7203	57.1802	374.276	15.8243	15.2853	122.289	135.949	83.234	24.6173	67.9064	254.252	87.5507	18.476	43.5843	14.7406	10.9634	246.435	124.286	5.15186	185.784
LCL12	ERR188062	4934.74		46.415	0.411062	6.06446	47.8144	31.3857	13.0566	86.8509	0	865.695	1.65418	288.37	135.509	189.424	7.61841	0	208.33	55.416	700.508	10.0514	0	30.8603	137.634	325.155	129.331	11.6107	104.546	32.2299	58.851	412.101	13.2667	12.9135	100.258	141.437	81.7164	14.019	53.0576	204.445	63.0025	10.4916	43.755	9.81117	6.1845	199.78	171.648	1.75582	59.4046
LCL13	ERR188061	4746.85		50.2212	0.361215	4.18712	47.9499	48.4717	24.3859	84.8637	0	1320.06	21.5616	300.88	92.698	132.14	23.4945	0	170.486	26.0683	290.412	14.9048	0	23.2916	60.9336	250.736	192.073	25.4173	55.7991	19.1362	46.4067	364.421	11.5098	10.0271	114.108	107.499	70.1269	25.1029	47.8183	206.304	106.055	14.7111	30.7592	11.1144	5.67608	205.744	114.704	17.8359	647.368
LCL14	ERR188064	4733.8		42.5328	0.989692	5.94473	105.907	59.5544	39.1425	151.277	0	1356.19	9.35931	217.17	126.05	197.239	24.2478	0	190.08	44.3774	440.129	19.3442	0	26.256	101.472	245.059	171.071	24.129	68.6787	36.1326	60.9611	367.098	17.7845	18.7904	150.621	131.827	96.9911	17.5769	65.9479	188.939	64.3869	15.758	50.7529	10.9287	8.73552	185.235	123.618	5.58015	145.234
LCL15	ERR188056	4491.96		33.003	0.508371	6.13643	55.7025	28.2728	14.8057	89.7036	0	1048.1	8.27607	334.151	113.409	115.508	8.38429	0	144.184	28.6463	465.597	12.2895	0	25.9263	77.8601	334.791	115.914	12.3668	87.3533	22.3292	60.0724	403.884	22.9424	15.7752	174.695	125.722	101.706	33.9913	48.7758	175.635	47.658	16.6843	35.7025	10.2466	8.34385	216.293	132.814	3.93233	128.73
LCL16	ERR188029	4097.77		60.6015	1.51772	11.9267	31.933	72.7588	41.0838	52.3419	0	588.916	11.1681	319.611	134.175	148.76	10.2126	0	162.719	39.174	358.834	17.9559	0	36.909	81.1303	331.82	291.634	49.6377	58.366	32.6082	87.6219	513.646	14.9797	21.8756	55.6527	176.538	79.7162	35.8281	77.5596	345.847	117.212	22.2954	56.7587	13.8789	4.61038	163.649	205.334	8.13503	95.9026
LCL17	ERR188045	4027.99		43.5034	0.795857	6.64947	61.4459	54.7177	28.5407	96.4087	0	594.581	22.4186	394.82	122.789	105.84	13.9791	0	143.413	36.3607	347.176	20.4389	0	29.3769	67.6251	291.743	214.586	41.5785	80.9278	33.1448	74.1624	444.996	21.27	16.5987	65.0784	125.488	91.6548	42.2496	59.4025	278.464	101.149	26.8079	49.1404	9.17077	4.10531	135.073	143.119	13.5201	160.312
LCL18	ERR188024	3950.93		26.9078	0.432214	3.82592	67.5921	32.081	20.6074	148.174	0	1467.99	38.2647	407.878	99.4266	105.349	19.2902	0	125.654	26.7904	280.065	16.9375	0	21.7384	49.8064	188.259	112.671	22.8742	67.3509	23.2377	42.1226	303.071	17.5905	12.7979	108.296	108.273	79.4946	24.1965	30.2451	133.706	43.2959	18.208	30.9245	6.93536	4.50857	127.913	52.9315	9.30469	380.058
LCL19	ERR188046	3926.36		40.6028	1.00525	5.23432	49.5398	42.7621	24.1947	88.3047	0	958.142	14.3965	254.004	96.0222	118.712	16.2874	0	128.063	41.2017	415.834	18.3783	0	26.636	68.1413	186.881	153.594	25.317	74.2273	35.8735	57.0652	339.295	18.292	12.8481	102.393	110.372	84.0577	31.049	45.0845	173.149	64.4921	19.0263	39.5493	10.9678	7.4731	170.681	99.9698	2.84909	139.106
LCL20	ERR188047	3681.92		20.6078	0.314759	4.69107	99.8657	18.2778	15.4803	179.737	0	610.321	47.861	539.753	87.5518	74.5598	6.19945	0	131.815	32.2203	365.936	15.7982	0	27.3376	100.185	167.158	87.3141	9.75953	69.9142	16.4164	51.4296	297.551	22.3588	11.5268	55.8877	78.408	87.2901	20.9195	27.4502	113.509	31.5382	14.7664	41.6461	8.37897	4.7807	107.729	66.5856	10.8787	154.529
LCL21	ERR188068	3656.23		30.7075	0.672576	3.78005	49.9811	37.1117	22.8179	78.5089	0	649.653	10.5255	345.991	128.212	149.522	12.0373	0	144.453	30.7165	293.636	17.6	0	29.1189	78.5852	279.448	169.773	28.6625	57.3013	30.8125	62.2355	404.755	15.2684	12.5494	83.803	152.119	78.434	15.7246	57.1725	211.587	62.3489	13.7992	42.5851	7.80084	6.74602	166.869	143.113	3.2176	117.43
LCL22	ERR188033	3552.18		40.5296	1.05903	3.55728	45.2007	37.2197	21.4308	68.0907	0	1054.35	8.92301	201.229	84.9138	124.091	13.8929	0	121.454	40.4452	370.236	12.8733	0	20.4864	48.7226	151.699	120.563	27.945	66.078	20.3179	43.2149	279.064	12.9803	11.1605	106.989	75.3511	61.263	24.5328	36.4319	163.903	65.7331	14.0151	31.7592	10.9635	4.91279	139.173	84.9352	3.6641	149.06
LCL23	ERR188070	3533.41		36.2467	1.04779	8.96315	55.3968	46.8861	28.4183	102.958	0	1065.28	14.1376	276.715	83.7772	130.498	13.0204	0	134.118	33.0556	331.426	12.731	0	34.2356	70.2147	198.169	148.992	14.6602	52.1718	25.9726	55.8085	344.652	10.671	14.9549	100.236	113.618	59.5567	17.8472	51.3376	171.99	63.1668	12.4032	35.6161	9.83678	7.6657	172.489	112.019	3.9806	165.665
LCL24	ERR188055	3194.06		22.9028	0.109324	1.55528	102.596	36.9467	27.9665	120.753	0	966.574	10.4486	155.452	69.9566	99.7421	27.4932	0	121.005	49.0206	482.67	13.0847	0	18.5801	55.326	78.6444	70.5782	11.5391	93.7792	20.8501	26.3757	180.309	12.1101	8.69224	87.9623	50.4616	67.6248	13.8233	30.772	76.987	25.4438	9.30775	24.8626	6.46047	5.26337	72.792	37.8719	2.4656	147.366
LCL25	ERR188058	3041.64		19.6171	0.517091	4.17764	38.6153	18.0147	8.6341	51.0197	0	344.743	2.19647	288.887	117.055	111.077	3.45422	0	107.531	29.6773	336.665	7.4034	0	23.1811	79.5504	297.886	94.7167	10.9328	75.2005	21.4978	45.4522	295.376	7.9201	7.83673	67.4287	116.786	56.7268	10.9803	40.8351	129.593	40.2979	7.0198	27.6221	5.70006	7.03057	139.012	119.28	1.53138	58.1103
LCL26	ERR188057	2888.6		18.2667	0.614308	3.46798	74.0782	30.6881	19.2126	118.331	0	340.058	11.8307	287.181	93.7634	85.3991	5.40172	0	99.8746	36.7464	360.246	8.85176	0	12.9747	76.6156	187.467	103.889	15.9164	67.2603	23.2725	40.2542	300.949	11.4494	9.74451	61.8432	76.3234	70.4054	16.1788	42.4604	173.751	45.8459	10.1643	33.4633	3.33118	1.9365	52.9748	91.5241	4.45325	42.1254
LCL27	ERR188038	2782.82		37.2957	0.0730515	4.38795	57.3611	32.5974	17.3651	89.1516	0	599.339	12.9348	266.591	81.488	94.0027	14.2104	0	113.35	30.9898	342.335	16.8168	0	25.2346	51.373	151.244	115.06	23.4574	72.326	21.3628	49.0875	287.43	15.5248	10.9656	103.945	100.154	66.8454	29.7555	35.3639	152.069	61.9754	19.749	35.4993	10.9027	7.4737	159.947	71.9983	3.8193	116.521
LCL28	ERR188042	2782.7		14.1576	0.31019	1.7161	146.714	31.8858	24.9493	225.871	0	1019.81	41.5045	202.353	40.4399	58.7296	20.6703	0	69.1067	22.67	206.237	11.1901	0	17.787	30.2404	77.5549	59.5621	10.1449	38.362	14.3671	19.6793	121.293	9.0355	7.12245	64.2093	41.3397	34.912	11.0778	17.211	65.6438	24.5919	9.47473	17.1059	4.68298	4.66686	64.5327	17.9723	5.3263	269.276
LCL29	ERR188041	2499.37		21.2758	0.391149	4.25932	78.5127	29.7293	21.167	136.922	0	380.134	13.9916	251.29	77.6152	85.2456	5.37644	0	102.96	25.2194	247.471	6.27143	0	14.4125	63.9838	169.858	101.553	10.9836	45.0898	20.2878	36.4014	217.594	8.23775	9.23461	55.7779	70.3848	45.3165	11.1585	39.6046	131.441	36.3785	7.13615	28.0437	4.31176	2.87707	82.8023	93.5148	6.01475	97.147
LCL30	ERR188052	2306.98		7.11961	0	0.918547	23.2963	10.0769	8.53417	65.2074	0	403.861	4.18974	143.148	59.9574	51.6056	8.13577	0	81.7109	61.8414	413.525	15.3778	0	19.6719	38.6166	52.2533	40.125	5.61517	57.959	13.7214	31.6166	183.412	7.50983	4.71321	60.9287	44.2143	49.0747	13.9288	12.796	31.6132	12.3688	6.42526	14.6306	2.50657	1.65142	35.3744	17.9567	1.0425	74.7248
LCL31	ERR188025	2299.32		17.2264	0.41126	5.05615	59.3437	21.1055	13.1721	84.8694	0	254.207	2.94219	141.896	65.6371	69.1883	2.9607	0	86.7253	21.1928	279.69	6.70413	0	13.0067	78.3856	144.215	73.0266	9.37452	41.6626	20.0859	29.9433	221.334	10.0486	7.48564	62.7171	68.7223	53.8976	14.2022	32.5252	95.9655	27.5102	6.56832	25.501	3.74502	2.74999	73.4367	79.8176	1.96746	33.291
LCL32	ERR188034	2131		15.1037	0.194086	2.76112	54.3371	27.6034	16.5057	70.0459	0	192.979	4.49095	140.003	50.4568	47.6676	2.00326	0	54.6823	13.2247	172.412	4.63654	0	10.1907	44.4335	153.241	102.085	13.5609	34.8045	16.9215	34.5699	230.863	4.45911	8.44743	27.599	63.6492	37.8282	11.0528	32.9403	132.266	37.5544	7.18913	21.6808	5.19054	0.973353	61.4055	120.265	1.89017	28.5712
LCL33	ERR188021	1996.93		18.4607	0.287093	2.72284	69.9329	37.0669	20.0029	100.931	0	574.241	11.4376	135.528	37.473	49.1713	10.2523	0	64.5016	14.1352	116.129	11.6385	0	20.1518	22.5168	76.3136	66.2766	12.6331	23.8676	17.9384	29.5528	129.913	8.10358	7.24147	40.8246	48.112	30.2633	12.0819	17.811	73.6447	30.2956	10.1898	16.8335	4.50765	4.60732	71.8148	37.5404	2.70766	83.7297
LCL34	ERR188054	1993.2		10.0905	0.195682	4.79437	39.653	17.2218	12.8654	62.729	0	313.124	6.3981	226.824	69.3261	48.1422	2.56521	0	64.0178	17.2045	208.505	9.4438	0	16.6285	48.1214	143.557	66.5487	7.12712	46.418	18.9267	36.0199	201.285	11.6409	7.54451	37.7324	78.5198	53.4936	15.4878	24.6785	82.1456	24.4358	9.97988	26.4477	3.75611	1.96272	56.0672	53.8245	4.11234	57.1887
LCL35	ERR188027	1865.04		6.57758	0.0526449	0.665725	20.2611	6.55653	5.60984	91.7092	0	310.356	13.9822	179.776	39.1904	29.9766	3.91864	0	52.5108	10.6457	136.673	5.48789	0	12.3661	28.0261	74.1257	30.1936	2.97397	27.8153	11.6659	19.6319	104.293	7.60266	3.50014	58.5148	39.1685	27.4583	10.4676	11.0793	30.7959	9.36248	4.10377	7.8907	1.81666	2.53457	58.7765	20.4204	3.88573	164.509
LCL36	ERR188053	1780.27		8.28179	0.292916	2.54656	40.35	20.8984	12.7053	75.1546	0	182.344	8.39855	201.024	49.3731	33.0035	4.03846	0	48.2919	26.0753	211.951	6.43205	0	8.29706	32.0859	83.033	53.185	11.7572	48.15	14.0991	23.3819	155.921	9.13321	6.02312	33.0849	40.7303	48.1116	13.995	22.18	72.1186	26.8105	10.9713	21.6758	2.2111	0.293798	20.8913	35.372	5.2549	46.4172
LCL37	ERR188036	1581.4		7.82835	0.219413	1.90754	49.4306	16.0662	10.8285	103.342	0	219.065	22.405	215.379	38.4224	30.4933	3.8516	0	44.2973	16.5179	158.95	5.05628	0	7.27614	29.0816	68.8139	44.3842	10.1116	45.2257	10.5612	16.665	126.779	5.04101	4.85009	29.2258	31.5398	38.699	8.78893	14.2654	55.3947	17.5942	6.55034	17.0898	1.79822	1.21041	22.959	28.637	10.0656	96.3287
LCL38	ERR188072	1581.27		8.70883	0.365861	0.693978	130.675	37.4139	29.5895	214.37	0	335.281	18.9925	161.138	40.529	36.4363	9.50397	0	49.6137	17.8526	182.856	6.95676	0	9.9083	37.0304	58.415	48.0824	6.5267	35.9462	14.354	16.3023	100.356	7.80523	5.11568	67.1062	31.3961	32.9088	8.89901	12.6863	40.3936	14.2082	6.79614	20.6933	3.59814	3.37606	43.2671	22.135	1.80028	92.5512
LCL39	ERR188071	1462.25		8.1665	0.170382	2.4239	58.3766	15.5417	11.7548	81.5404	0	377.536	10.6275	139.438	23.5931	28.9998	2.86254	0	38.6845	11.6096	97.8808	6.49601	0	8.94612	19.0368	44.6549	26.9466	3.54608	19.3742	5.72531	16.9501	84.565	3.91452	3.73707	27.2952	32.3685	21.944	6.90715	10.0098	34.1209	12.2518	4.4272	11.0824	1.83735	2.22164	45.3281	16.8341	3.49332	127.376
LCL40	ERR188050	1302.54		6.15318	0.0544075	0.860018	42.2874	12.6498	8.13903	68.9067	0	166.384	6.13046	129.459	25.6866	25.3168	2.14789	0	25.2113	9.92587	91.8832	3.8336	0	4.9617	18.1177	51.549	28.8916	3.7206	20.9712	9.88239	14.3905	89.4754	3.34824	2.68503	26.491	21.6155	17.7236	5.88169	10.9388	38.6009	10.3424	4.21109	9.23195	1.6428	0.764	30.8825	24.8206	2.39834	86.0604
LCL41	ERR188040	1184.21		5.17951	0.131748	0.833015	58.9599	17.3977	10.7993	135.372	0	153.14	19.6165	156.816	16.9729	23.4248	2.9579	0	22.9785	7.38442	70.6777	3.24272	0	4.55105	13.71	35.3963	26.627	3.52544	17.0631	7.05943	11.537	65.8082	3.24311	2.61878	25.3154	22.2692	13.2611	6.10395	7.91212	26.0369	9.17489	2.84064	6.86181	1.81853	1.1893	28.6773	17.6774	1.21554	69.8963
LCL42	ERR188059	1173.5		9.58686	0.169537	0.267987	69.1476	21.4064	20.6716	118.671	0	245.417	16.5445	95.5726	30.1462	42.6878	11.6488	0	46.8911	13.4153	132.773	7.15927	0	10.7758	32.4993	44.9913	42.5099	7.30903	23.6463	20.94	12.9273	98.2298	6.53823	4.93869	65.0007	27.9218	30.1348	6.21834	19.7434	36.353	13.3064	4.78017	17.1406	2.77892	3.40096	38.9948	27.5042	2.3463	79.9127
LCL43	ERR188069	1146.33		6.14385	0.136626	1.29578	65.2467	20.3291	14.7455	113.119	0	192.958	10.0339	93.4196	16.9689	24.9455	2.06895	0	23.0889	4.65475	57.1927	3.26387	0	6.04101	11.9727	36.5569	25.4471	2.84352	12.8604	5.58365	10.1736	58.6296	2.7466	3.18397	18.26	27.3373	13.9396	3.82433	8.52611	33.796	10.8472	3.47454	7.79202	1.29653	0.959261	27.2439	20.1651	1.96085	53.7517
LCL44	ERR188067	986.03		5.79614	0.481908	1.26958	24.5595	7.36402	4.25191	47.938	0	170.198	5.41382	92.3116	15.6758	17.7829	1.99081	0	17.3862	5.20794	56.8958	2.28697	0	4.32817	6.86243	22.2833	12.0082	1.67162	9.85036	4.01188	7.27258	36.7614	2.04301	2.17454	9.93935	11.8355	8.4335	2.5583	4.5928	18.2539	5.17427	1.62074	3.00962	0.762188	0.805599	16.5708	11.7564	5.02257	191.796
LCL45	ERR188048	969.87		5.14901	0.0446775	0.988701	29.9229	9.31102	7.32436	78.5884	0	124.202	1.16863	67.7637	24.3326	26.747	1.56181	0	31.6994	7.95436	92.5871	2.4796	0	4.19783	14.2903	53.0106	25.6884	2.92239	16.2385	5.92399	11.9766	58.3914	2.12624	1.99048	18.979	20.848	10.568	2.50116	9.12254	28.5191	9.20222	2.54409	7.55988	1.88861	1.70286	31.4899	26.0494	0.595409	37.5787
LCL46	ERR188051	968.33		5.62361	0.0762207	2.16867	16.2771	6.6783	5.67504	45.8624	0	89.522	0.766813	63.2756	23.7547	29.4628	1.32076	0	31.858	6.70139	94.6574	2.79564	0	4.63397	14.3606	47.8097	21.3633	3.17269	14.8728	8.58356	12.8043	61.7867	3.18963	2.50767	24.6955	25.1062	15.7276	5.00273	7.5229	24.2518	8.95614	2.78115	7.11329	1.57812	1.68191	33.7082	15.8053	0.468822	39.9533
LCL47	ERR188037	815.93		3.14753	0.0885533	0	65.8758	15.4623	13.0051	106.244	0	84.3711	16.7486	145.935	8.33413	9.8654	2.09487	0	11.1038	5.64462	37.2562	1.70946	0	2.69187	7.17806	11.4587	7.84794	1.57973	10.4649	4.66451	7.59626	23.0533	1.59854	1.39601	6.61493	5.2452	7.00912	0.683786	2.95962	9.15857	3.09345	2.44784	3.92342	0.68755	0.888201	7.34293	4.96872	5.71912	113.744
[truncated: 14 more columns]

## Sheet: Modified Namalwa cell lines_EBV
	Geneid	BNRF1	oriP	BCRF1	EBNA1	EBNA-3B/EBNA-3C	EBNA-3A	EBNA2	EBNA-LP	BHLF1	oriLyt-1	BHRF1	BFLF1/2	BFRF1/2/3	BOLF1/BPLF1	EBNA-1.2	BORF1/2	BaRF1	BMRF1/2	BSLF1	BSLF2/BMLF1	BSRF1	BLLF3	BLRF1/2	BLLF1/2	BZLF2	BRLF1/BZLF1	BRRF1	BRRF2	BKRF2/3/4	BBLF4	BBRF1/2	BBLF2/BBLF3	BBRF3	BGLF3/3.5/4/5	BGRF1/BDRF1	BDLF3.5/4/BGLF1/2	BDLF1/2/3	BcLF1	BcRF1/BTRF1	BXLF1/2	BXRF1/BVRF1	BVLF1	BVRF2/BdRF1	BILF2	RPMS1	RPMS1/BAREs	BARE1	BARE2
PTRE-0ng-1	GX01_1_HV_tpm.txt	0.569819	0	0	16.8844	2.57234	2.5574	28.6333	0	0	7.20561	78.7978	0.0627867	0.0915897	0	0	0.25199	0	0.13752	0	0	0.674762	0	0.535513	0	0	0	0.295668	1.35757	1.20585	0	0.223146	0	0.117583	0	0.314237	0	0	0	0.314976	0	0.14043	0	0.160689	0	0.417182	7.51771	1.21538	0.654961
PTRE-0ng-2	GX01_2_HV_tpm.txt	0.524605	0	0.27996	24.6886	2.68797	2.78257	30.7246	0	0	8.73092	79.1786	0	0.298961	0	0	0.091392	0.583943	0.374069	0	0	0.244723	0	0.388441	0	0	0	0.965099	1.79362	1.2183	0	0.182094	0	0.127936	0	0.170952	0	0	0	0.244791	0	0	0	0.174837	0	0.36313	7.77062	1.05791	0.81443
PTRE-0ng-3	GX01_3_HV_tpm.txt	1.08803	0.0777043	0	18.9644	3.06373	3.6093	23.3775	0	0	8.44277	79.1521	0	0.131163	0	0.80861	0.240578	0.341591	0.196938	0	0	0.214735	0	0.340841	0	0	0	0.705696	2.40703	1.64463	0	0.319561	0	0	0	0	0	0	0	0.128876	0	0.201105	0	0.230118	0	0.398289	11.2145	2.78481	1.78657
PTRE-50ng-1	GX01_4_HV_tpm.txt	0.757737	0	0	22.4527	2.66487	3.13621	34.2271	5.47993	0	10.8771	90.4697	0	0.25	0	0	0.267486	0.488311	0.750739	0	0	0.204645	0	0.324826	0	0	0	0.807045	1.14696	1.56735	0	0.253788	0	0.641901	0	0	0	0	0	0.122821	0	0.255541	0	0.292407	0	0.835064	8.76378	2.4328	0.68105
PTRE-50ng-2	GX01_5_HV_tpm.txt	0.537346	0	0	19.8847	2.40173	2.72623	44.9716	0	0.0601373	11.5823	99.1911	0	0.302296	0	0	0.435654	0.168702	0.194525	0	0	0.636308	0	0.336663	0	0	0	0.836456	1.09732	1.05591	0	0.631287	0	0.887058	0	0.444493	0	0	0	0.169729	0	0	0	0	0	0.865496	7.66529	1.14612	0.529402
PTRE-50ng-3	GX01_6_HV_tpm.txt	0.681005	0.632265	0.571096	24.8422	2.45898	2.34452	24.7635	0	0.0707711	15.993	125.85	0	0.508213	0	0	0.326256	0	0.152614	0	0	0.249608	0	0.396194	0	0	0	0.984362	1.82942	1.62496	0	0.557186	0	0.130489	0	0	0	0	0	0.399483	0	0.0779216	0	0	0	0.833349	10.6893	1.61853	0.415343
PTRE-1000ng-1	GX01_7_HV_tpm.txt	0.960455	0.118895	0	16.406	2.04626	4.06073	14.856	0	0	25.5973	122.444	0	0.334487	0	0	0.552162	0	0.301335	0	0	1.64283	0	0	0	0	0	0	1.55819	1.25822	0	0.488959	0	0.343532	0	0	0	0	0	0.328656	0	0.20514	0	0.117368	0	1.21884	15.306	4.61612	1.09345
PTRE-1000ng-2	GX01_8_HV_tpm.txt	0.761966	0.101062	0	20.2538	3.2573	2.27808	22.9261	0	0.0791847	16.8776	95.1217	0	0.568631	0	0	0.312894	0	0.341515	0	0	0.279282	0	0.886591	0	0	0	1.83565	0.963249	1.0695	0	0.138539	0	0.584009	0	0.975464	0	0	0	0.391103	0	0.261556	0	0.0997634	0	0.621614	11.61	3.01825	1.7427
PTRE-1000ng-3	GX01_9_HV_tpm.txt	0.897843	0	0	23.3095	2.16914	3.41641	29.2725	0	0	18.1848	109.166	0	0.197483	0	0	0.452778	0	0.593034	0	0	0	0	0.384886	0	0	0	0.79689	1.46358	1.67144	0	0.541284	0	0.887354	0	0	0	0	0	0.339571	0	0.151395	0	0.173237	0	0.53971	10.5868	2.09645	0.806977
PTRE-RPMS1-0ng-1	GX01_10_HV_tpm.txt	1.08805	0	0	30.0138	5.90978	4.32016	43.3705	0	0.0688261	20.679	169.2	0	0.247123	0	1.82819	0.498598	0	0.51947	0	0	0.728243	0	0.770611	0	0	0	1.91462	2.93034	1.48734	0	0.0602081	0	0.126903	0	0	0	0	0	0.679882	0	0.30312	0	0.173426	0	1.26069	19.1176	2.88576	0.605892
PTRE-RPMS1-0ng-2	GX01_11_HV_tpm.txt	0.923732	0	0.258216	26.8346	6.28745	3.06858	32.698	0	0	21.5289	160.169	0	0.321698	0	0	0.463615	0.17953	0.483022	0	0	0.225716	0	0.895678	0	0	0	1.92864	1.65431	2.5931	0	0.44787	0	0.353997	0	0.630696	0	0	0	0.451557	0	0.281853	0	0.322515	0	1.50717	17.5405	2.43935	1.03286
PTRE-RPMS1-0ng-3	GX01_12_HV_tpm.txt	0.768268	0	0	23.7867	6.08516	5.43642	42.6271	0	0.176488	18.884	159.701	0	0.126737	0	0	0.348691	0.165032	0.317155	0	0	0	0	0	0	0.223236	0	1.50014	2.68362	1.50968	0	0.720481	0	0.867763	0	0.579766	0	0	0	0.788676	0	0.453412	0	0.296471	0	1.30849	18.4213	3.58779	0.690516
PTRE-RPMS1-50ng-1	GX01_13_HV_tpm.txt	0.498082	0	0	22.4144	4.10436	2.87161	31.9251	0	0	8.9662	92.248	0	0.141923	0	0	0.3037	0	0.710315	0	0	0.23235	0	0	0	0	0	1.52718	2.30397	0.711819	0	0.172888	0	0.364402	0	0	0	0	0	0.418347	0	0.290137	0	0.248996	0	46.0269	199.976	2.51105	1.54651
PTRE-RPMS1-50ng-2	GX01_14_HV_tpm.txt	0.810751	0	0	19.0775	3.91746	3.08501	33.5459	11.7267	0	11.4787	108.888	0	0.267491	0	0	0.204429	0.174158	0.334693	0	0	0.437925	0	0.347552	0	0	0	1.5831	1.32161	1.34161	0	0.43447	0	1.03022	0	0.152956	0	0	0	0.131414	0	0.0683549	0	0.312865	0	39.5572	178.207	1.89309	0.728699
PTRE-RPMS1-50ng-3	GX01_15_HV_tpm.txt	0.924283	0	0	22.9908	3.66987	2.34468	29.9291	0	0	7.62596	100.922	0	0.0402362	0	0	0.405906	0.314365	0.120828	0	0	0.395239	0	0.156837	0	0	0	0.519559	2.64117	1.13516	0	0.19606	0.257439	0.309932	0	0.276094	0	0	0	0.316279	0	0.185076	0	0.141185	0	40.3931	194.028	1.495	0.493253
Pro-re-0ng-1	GX01_16_HV_tpm.txt	0.546673	0	0	17.1514	4.22013	3.41741	34.0401	0	0.113622	11.963	95.5757	0	0.367169	0	1.50905	0.374144	0	0.490041	0	0	0.601114	0	0.159021	0	0	0	1.18529	1.81409	1.84155	0	0.19879	0	0.942745	0	0.279939	0	0	0	0.60128	0	1.12592	0	1.50308	0	0.817626	10.1295	3.8978	1.16695
Pro-re-0ng-2	GX01_17_HV_tpm.txt	0.740868	0	0	20.3386	3.94607	2.8713	34.4899	0	0	14.1475	89.4258	0	0.344018	0	0	0.512685	0.167988	0.322835	0	0	0.211205	0	0	0	0	0	1.38819	3.00485	1.13232	0	0.366692	0	0.441652	0	0.737687	0	0	0	0.63379	0	1.45053	0	2.26336	0	0.548439	10.1036	3.19554	0.878603
Pro-re-0ng-3	GX01_18_HV_tpm.txt	0.790027	0	0	23.3007	3.769	2.74246	39.2449	0	0	12.2727	84.5373	0	0.0434422	0	0	0.199203	0.339413	0.130455	0	0	0	0	0.169334	0	0	0	1.68287	3.03559	1.63414	0	0.476284	0	0.780797	0	0.298093	0	0	0	0.725643	0	1.53197	0	1.60056	0	0.554049	10.0732	2.76705	0.798831
Pro-re-1000ng-1	GX01_19_HV_tpm.txt	3.38574	0	0	24.0383	3.17388	2.86292	33.6589	0	0.131358	13.4929	72.5971	0.323323	0.235822	0.0884138	0	0.259526	0.368495	0.354083	0	0	1.15824	0.367283	0.551529	0.181191	0	4.72264	1.3703	1.79765	1.33062	1.10049	0.632004	9.58112	0.484399	3.48999	0.323635	2.84534	1.98791	1.52117	1.11222	1.10627	2.24176	1.34523	2.89616	29.2427	86.963	431.986	66.8422	49.4349
Pro-re-1000ng-2	GX01_20_HV_tpm.txt	2.3284	0	0.278944	21.5345	2.81627	1.50678	30.506	0	0.0691344	11.8949	74.4369	0.4084	0.546106	0.0531803	0	0.409771	0	0.596339	0.0851656	0	0	0.193304	0.193516	0.190724	0.524681	4.12239	1.28213	1.57686	1.30726	0.579196	0.181433	9.05287	0.127471	2.58364	1.02199	0.967629	0.697499	0.480362	0.585366	0.748589	1.06567	1.41601	2.00333	32.5033	62.0507	357.985	57.9737	39.6608
Pro-re-1000ng-3	GX01_21_HV_tpm.txt	2.66104	0	0	12.421	1.72964	1.02972	27.7359	0	0.0656196	7.91994	77.7929	0.258425	0.471219	0.0252383	0	0.259292	0.184081	0.28301	0	0	0.231438	0	0.183677	0.120685	0	5.06363	0.76059	1.19735	0.265884	0.549749	0.287015	11.08	0.725943	1.37941	0	0.874699	0.496528	0.341955	0.370404	0.355265	1.22824	0.168002	2.14949	30.6465	39.9222	309.858	36.2673	25.2246
[truncated: 16 more columns]

## Sheet: LMP1BNLF2
	Total number of EBV+ samples		TPM of LMP-1 > 5	TPM of LMP1/BNLF2 > 5
NPC	106	Number	29	61
		%	27.3585	57.5472
			ratio >2	ratio >5	ratio >10
		BNLF2/LMP1	49	22	19
		%	0.803279	0.360656	0.311475
	Total number of EBV+ samples		TPM of LMP-1 > 5	TPM of LMP1/BNLF2 > 5
GAC	30	Number	0	9
		%	0	30
			ratio >10
		BNLF2/LMP1	9
		%	100
	Total number of EBV+ samples		TPM of LMP-1 > 5	TPM of LMP1/BNLF2 > 5
eBL	16	Number	2	2
		%	0.125	0.125
			ratio >2
		BNLF2/LMP1	1
		%	0.5
	Total number of EBV+ samples		TPM of LMP-1 > 5	TPM of LMP1/BNLF2 > 5
sBL	4	Number	0	1
		%	0	0.25
			ratio >2
	1	BNLF2/LMP1	1
		%	1
