# Supplementary figures and images for: Landscape of Epstein-Barr virus gene expression and perturbations in cancer
Source: Research Square preprint supplement (doi:10.21203/rs.3.rs-3911441/v1), 2024-02-02

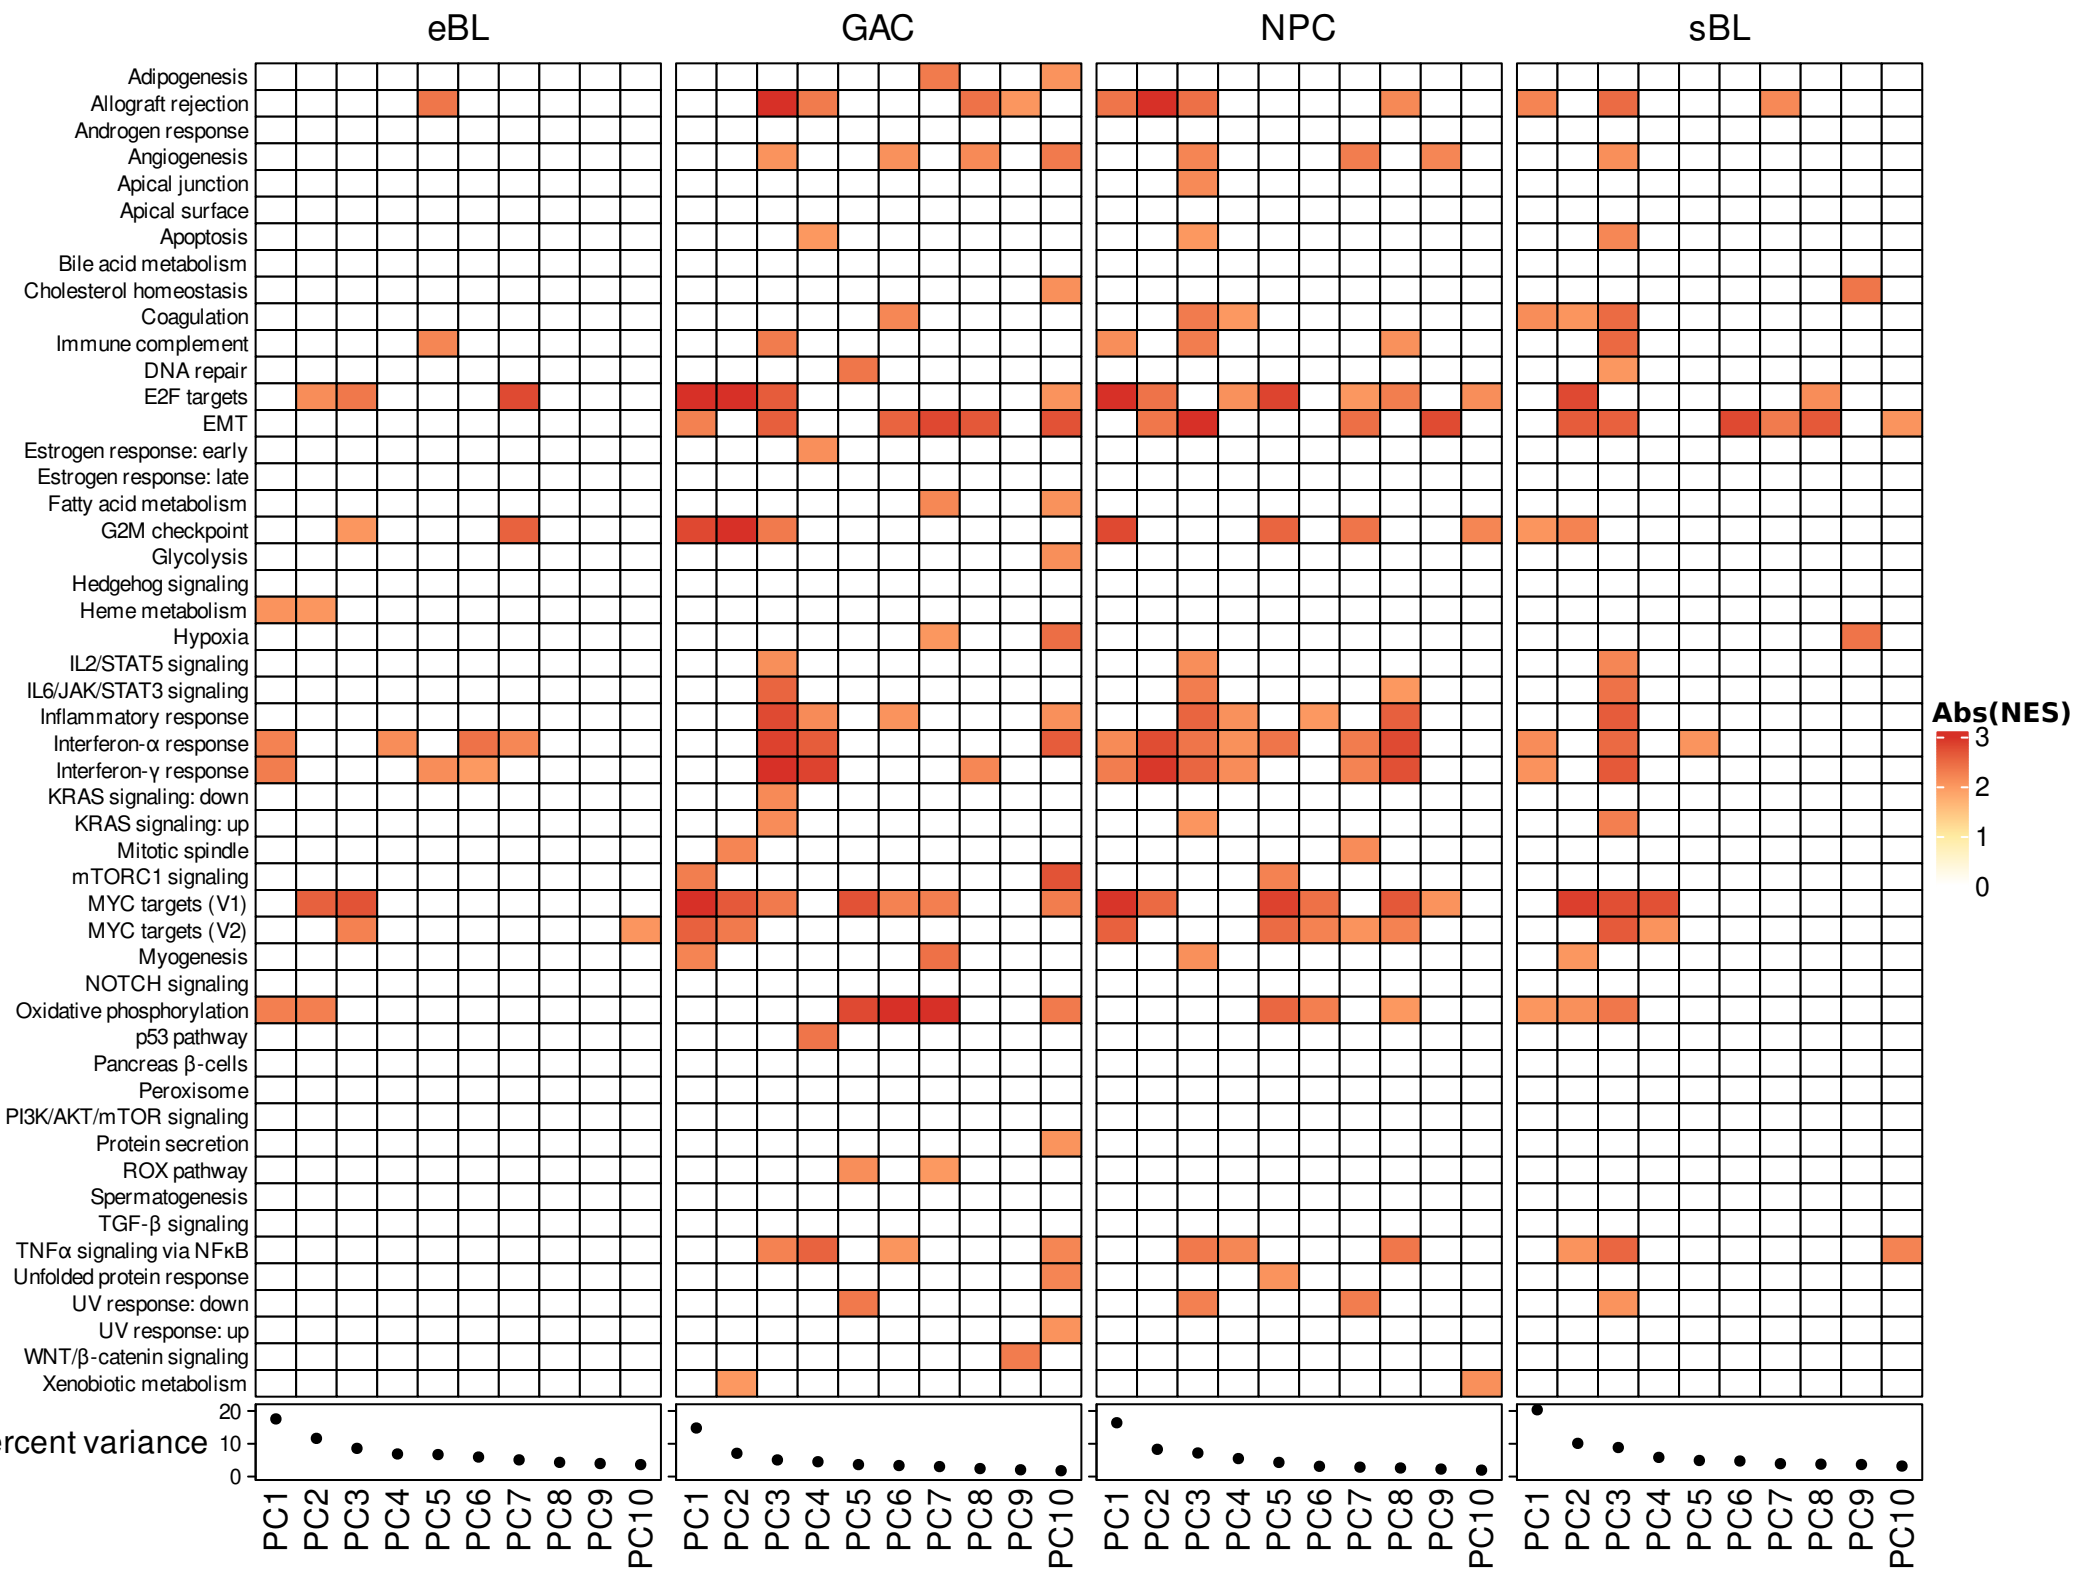

# NPC

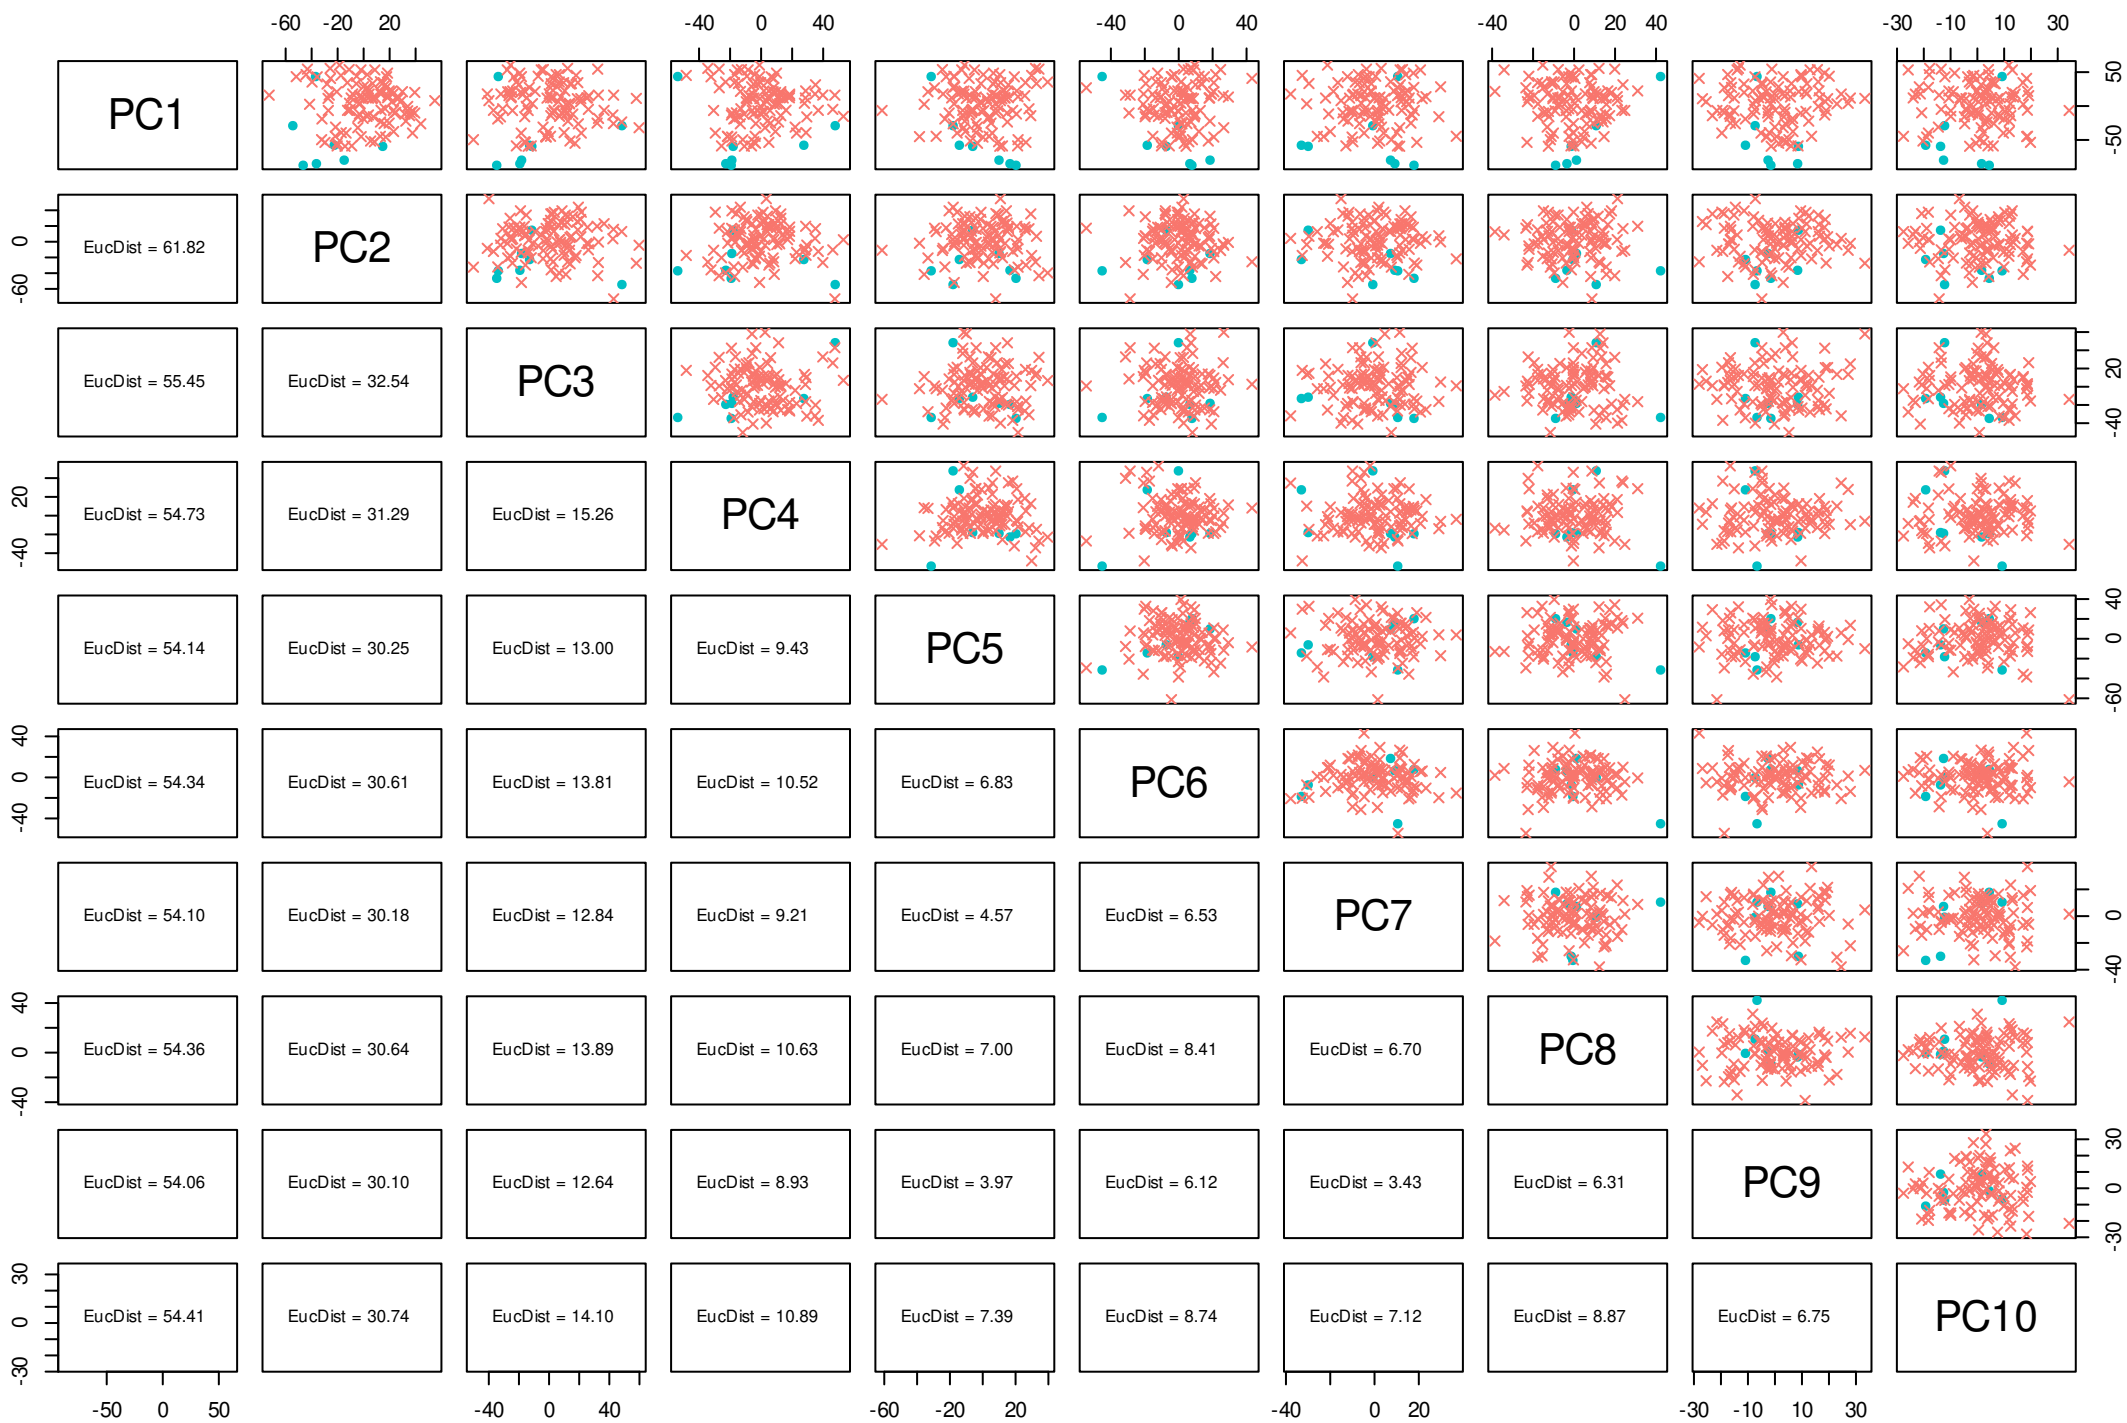

# GAC

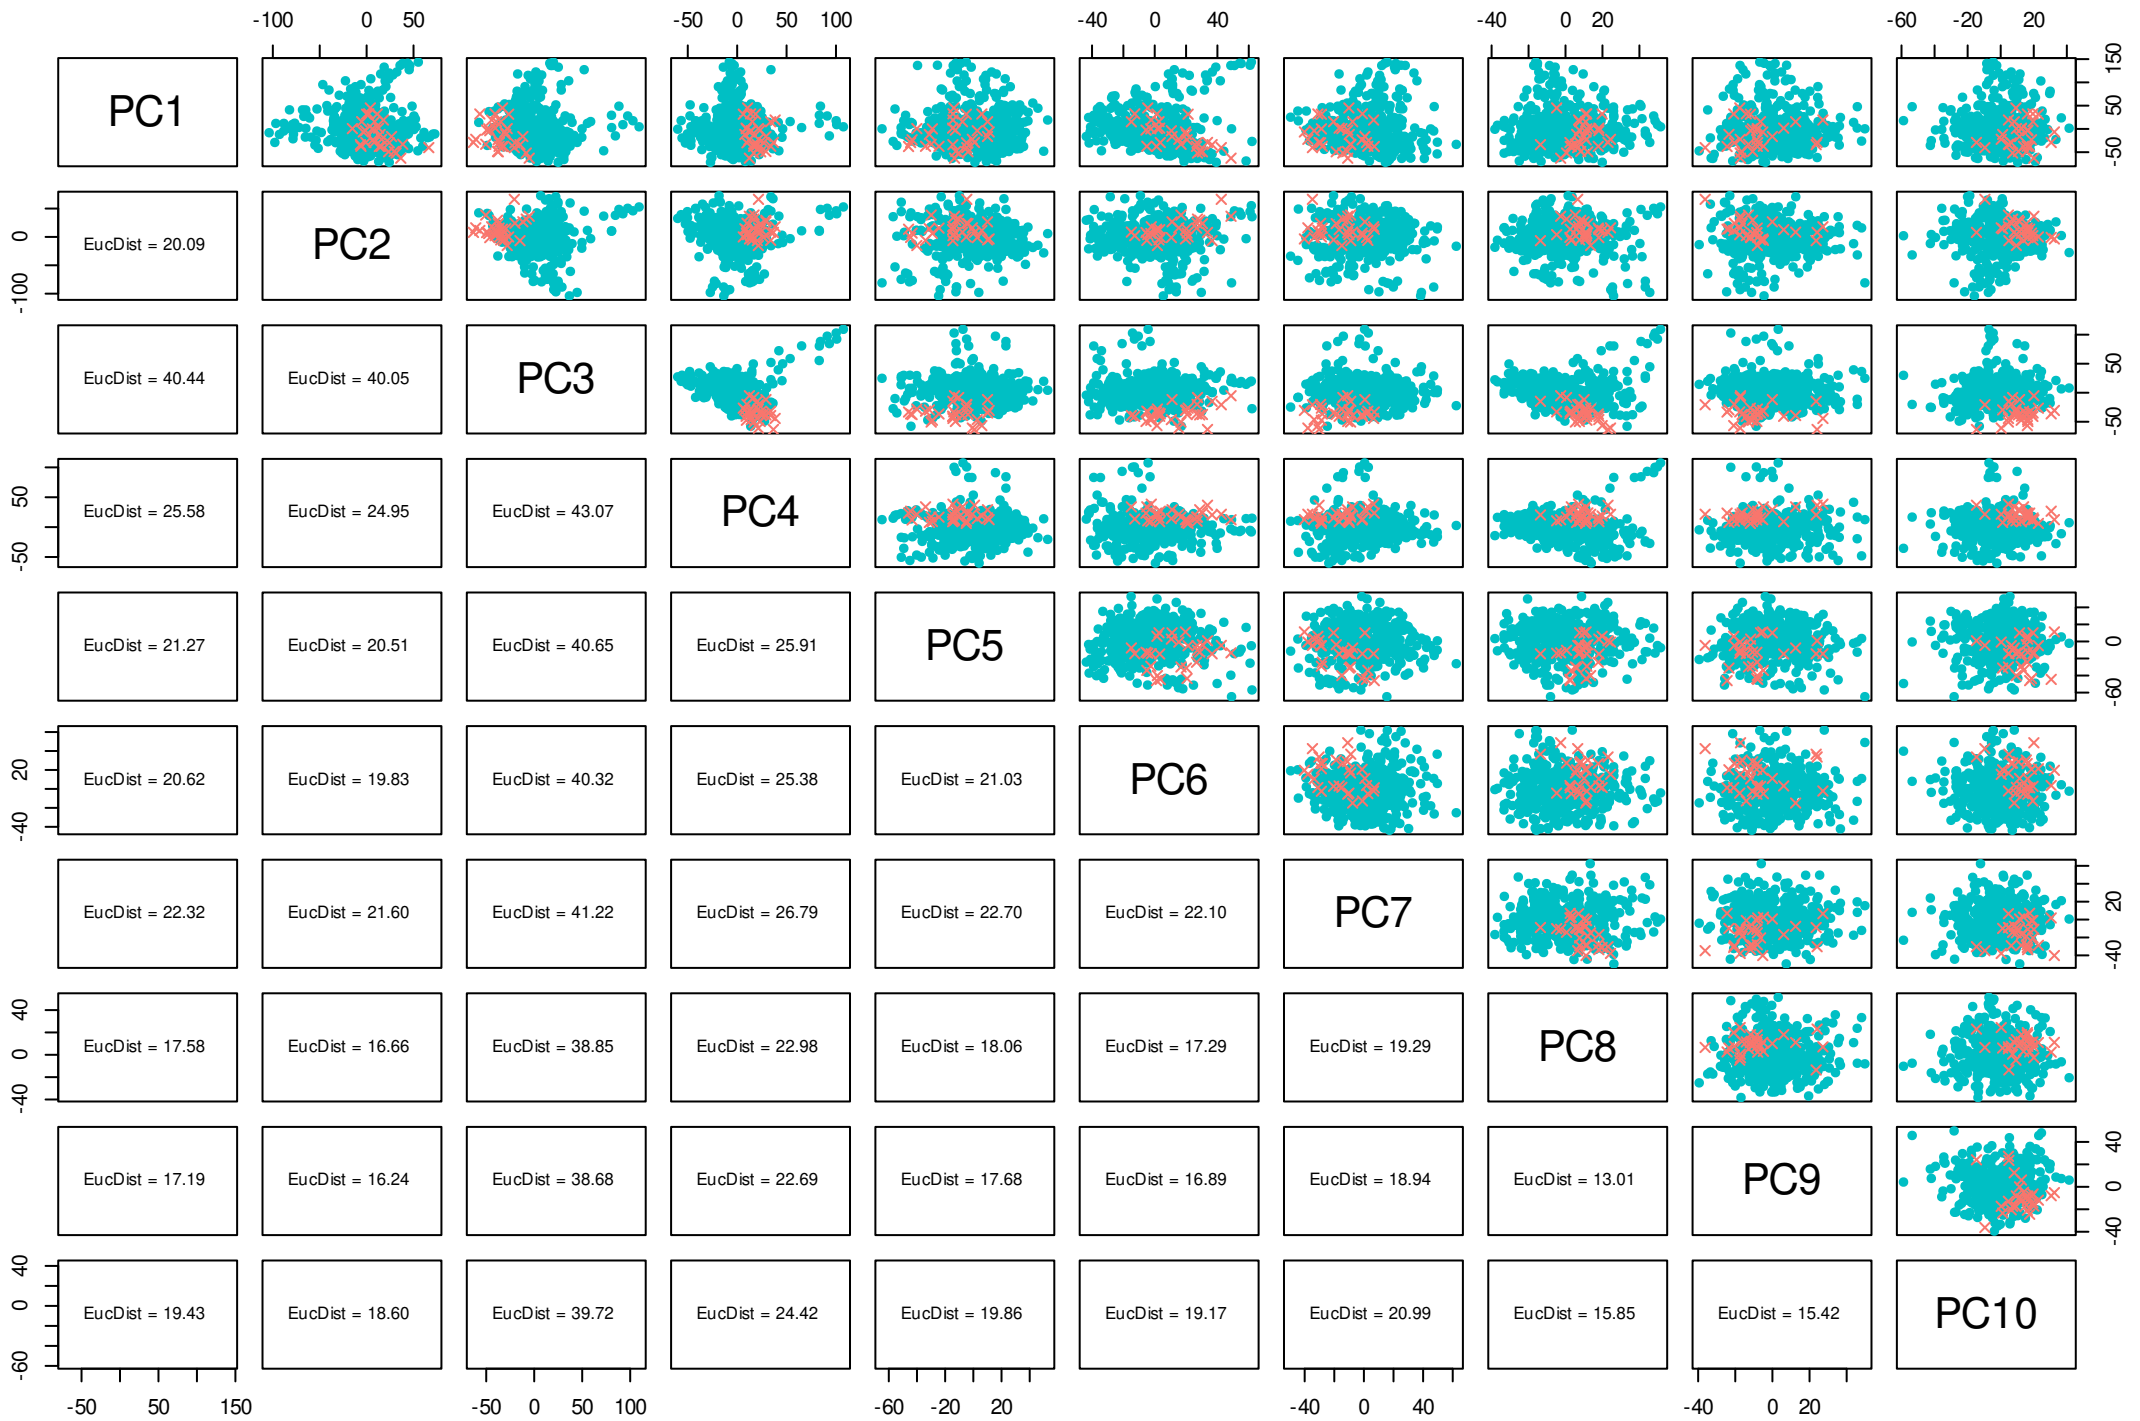



# sBL

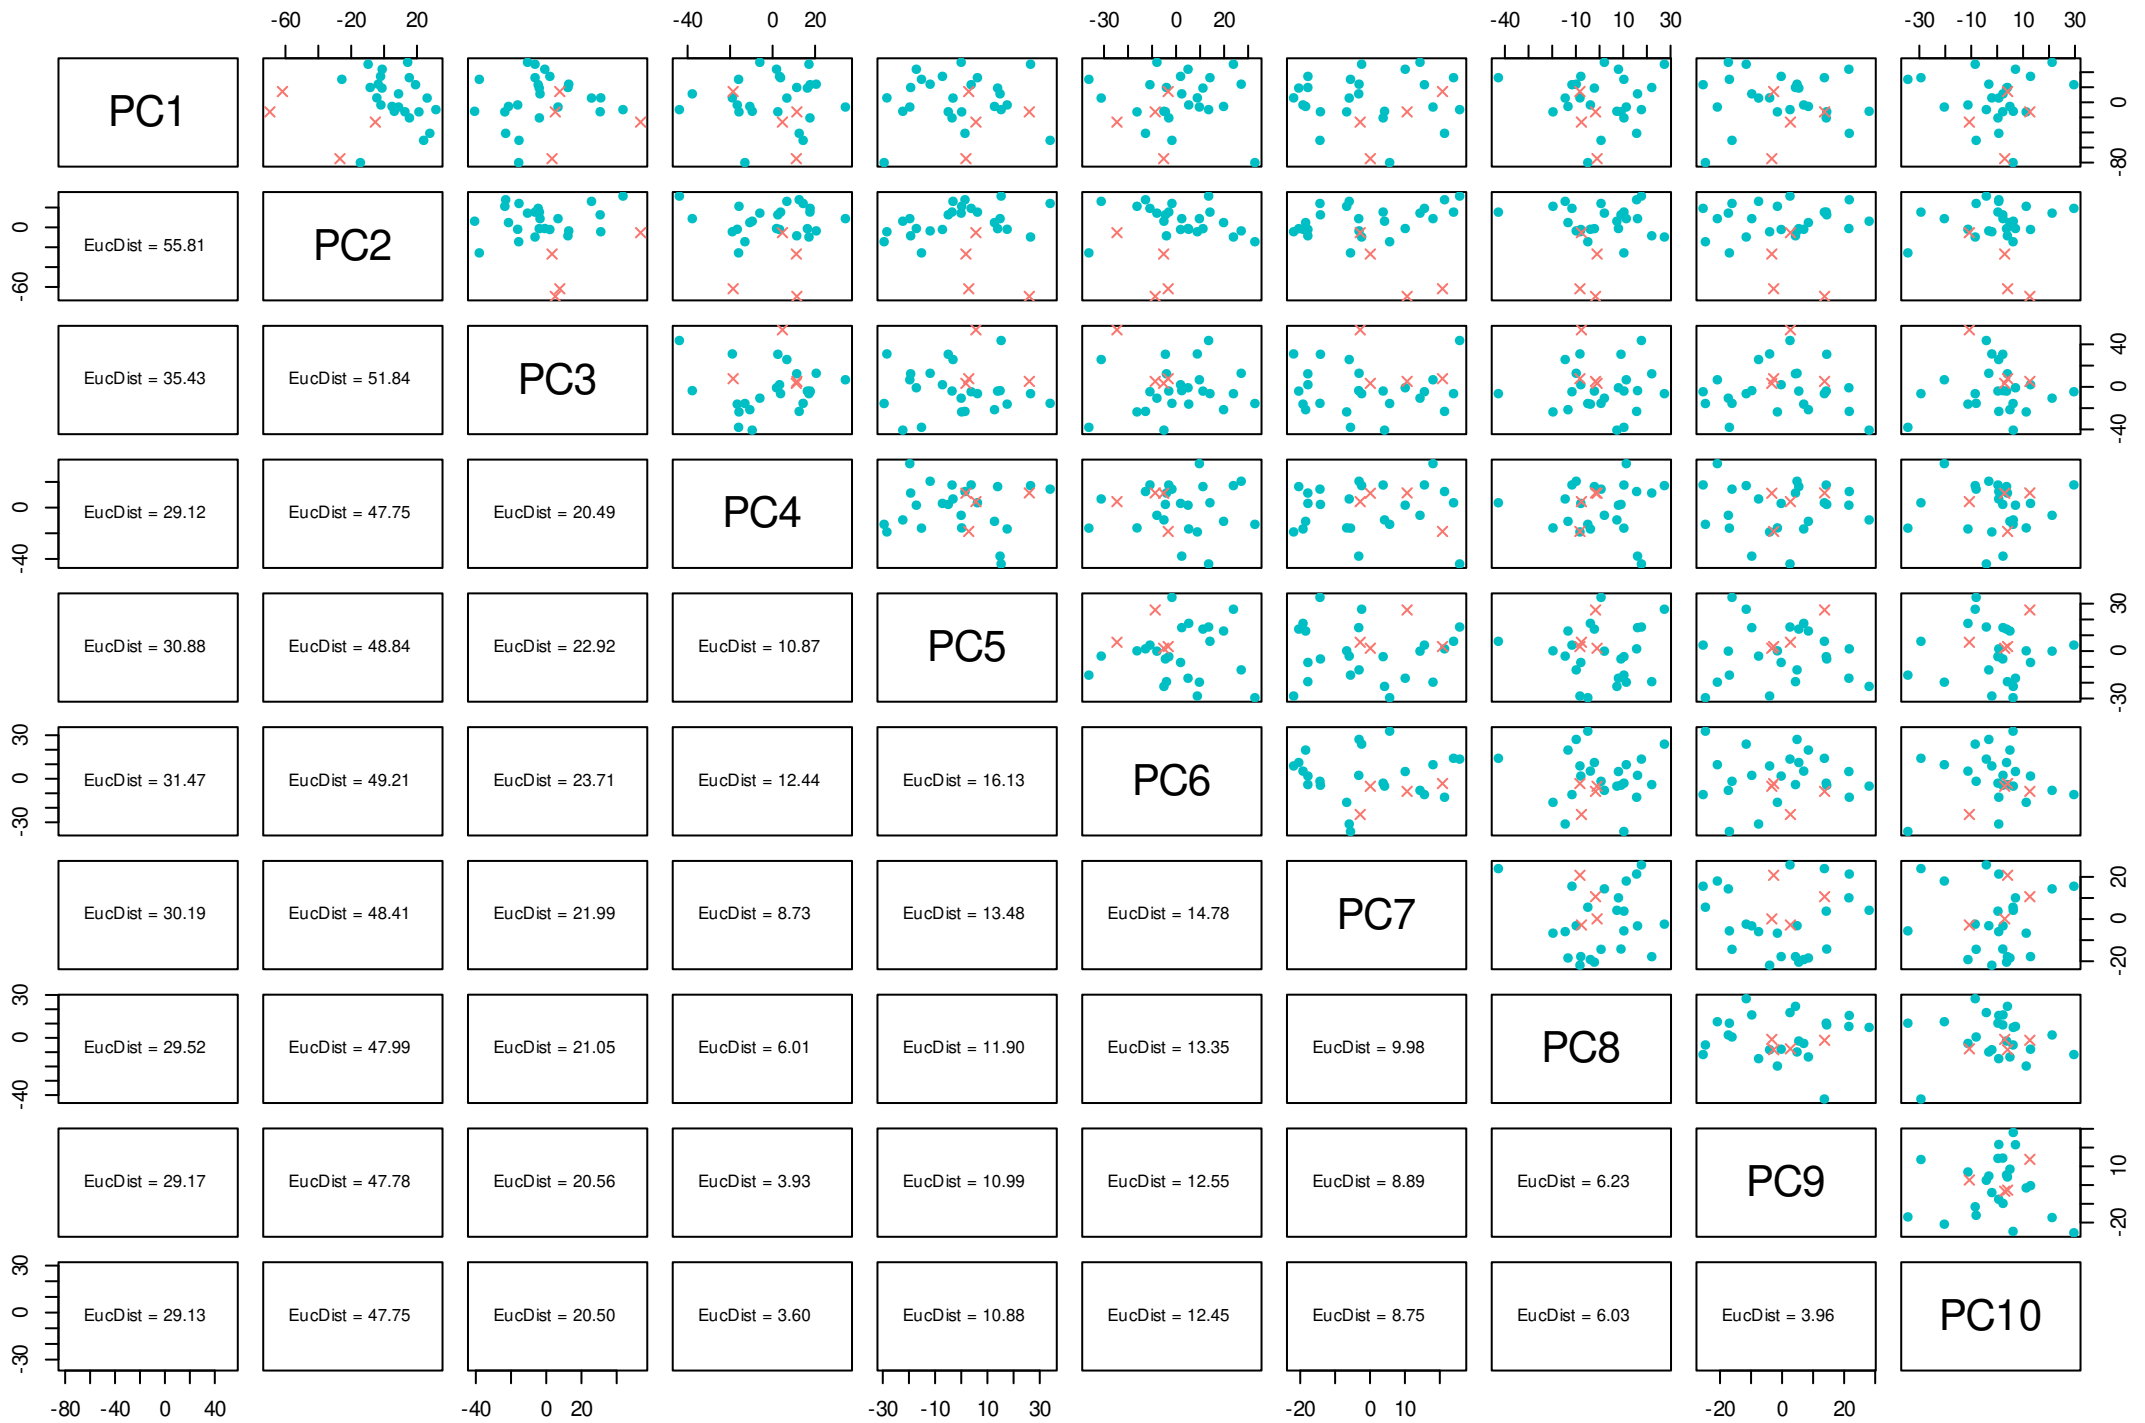

Supplement: Supplementary file 1 [file 6de97a6203a4af19a204f930.pdf]
